# Supplementary material for: Straightforward and Efficient Protocol for the Synthesis of Pyrazolo [4,3-b]pyridines and Indazoles
Source: MDPI journal article supplement (doi:10.3390/ijms24021758), 2023-01-16

# Supplementary materials.

## **Straightforward and efficient protocol for the synthesis of pyrazolo[4,3-b]pyridines and indazoles**

Vladislav V. Nikol'skiy, Mikhail E. Minyaev, Maxim A. Bastrakov and Alexey M. Starosotnikov\*

N.D. Zelinsky Institute of Organic Chemistry RAS, Leninsky prosp. 47, 11991 Moscow, Russia

E-mail: alexey41@list.ru

---

## X-ray crystallographic data and refinement details.

X-ray diffraction data for **2a**, **5a'**, **5c** and **5q'** were collected at 100K on a Rigaku Synergy S diffractometer equipped with a HyPix6000HE area-detector (kappa geometry, shutterless  $\omega$ -scan technique), using monochromatized Cu K $\alpha$ -radiation. The intensity data were integrated and analytically corrected for absorption and decay by the CrysAlisPro program<sup>1</sup>. X-ray diffraction data for **2b** were collected at 100K on a Bruker Quest D8 diffractometer equipped with a Photon-III area-detector (shutterless  $\phi$ - and  $\omega$ -scan technique), using graphite-monochromatized Mo K $\alpha$ -radiation. The intensity data were integrated by the SAINT program<sup>2</sup> and were corrected for absorption and decay using SADABS.<sup>3</sup> All structures were solved by direct methods using SHELXT<sup>4</sup> and refined on  $F^2$  using SHELXL-2018<sup>5</sup> within the OLEX2 program<sup>6</sup> (for **2a**, **5a'**, **5c** and **5q'**) or the ShelXle program<sup>7</sup> (for **2b**). Positions of all atoms were found from the electron density-difference map. Atoms were refined with individual anisotropic (non-hydrogen atoms) or isotropic (hydrogen atoms) displacement parameters. The disordered fragment in **5a'** was modeled by applying similarity constraints on anisotropic displacement parameters on similar atoms and by constraining similar distances between neighboring atoms to be equal within the deviation of 0.003 Å.

Crystal data, data collection and structure refinement details are summarized in Table S1. The structures have been deposited at the Cambridge Crystallographic Data Center with the reference CCDC numbers 2232898-2232902; they also contain the supplementary crystallographic data. These data can be obtained free of charge from the CCDC via <https://www.ccdc.cam.ac.uk/structures/>

## References

1. CrysAlisPro. Version 1.171.42. *Rigaku Oxford Diffraction*, **2021**.
2. Bruker. APEX-III. *Bruker AXS Inc.*, Madison, Wisconsin, USA, **2019**.
3. Krause, L.; Herbst-Irmer, R.; Sheldrick, G. M.; Stalke, D. Comparison of silver and molybdenum microfocus X-ray sources for single-crystal structure determination. *J. Appl. Cryst.* **2015**, 48, 3–10. <https://doi.org/10.1107/S1600576714022985>
4. Sheldrick, G. M. SHELXT - Integrated space-group and crystal-structure determination. *Acta Cryst.* **2015**, A71(1), 3-8. <https://doi.org/10.1107/S2053273314026370>
5. Sheldrick, G. M. Crystal structure refinement with SHELXL. *Acta Cryst.* **2015**, C71(1), 3-8. <https://doi.org/10.1107/S2053229614024218>
6. Dolomanov, O.V.; Bourhis L.J.; Gildea R.J.; Howard J.A.K.; Puschmann H. OLEX2: a complete structure solution, refinement and analysis program. *J. Appl. Cryst.* **2009**, 42(2), 339-341. <https://doi.org/10.1107/S0021889808042726>
7. Hübschle, C.B.; Sheldrick, G. M.; Dittrich, B. ShelXle: a Qt graphical interface for SHELXL. *J. Appl. Cryst.* 2011, **44**, 1281-1284. <https://doi.org/10.1107/S0021889811043202>

Table S1. Crystal data and structure refinement for **2a**, **2b**, **5a'**, **5c** and **5q'**.

| Identification code                                                     | <b>2a</b>                                                     | <b>2b</b>                                                                    | <b>5a'</b>                                                    | <b>5c</b>                                                     | <b>5q'</b>                                                     |
|-------------------------------------------------------------------------|---------------------------------------------------------------|------------------------------------------------------------------------------|---------------------------------------------------------------|---------------------------------------------------------------|----------------------------------------------------------------|
| Empirical formula                                                       | C <sub>11</sub> H <sub>11</sub> N <sub>3</sub> O <sub>7</sub> | C <sub>12</sub> H <sub>11</sub> F <sub>3</sub> N <sub>2</sub> O <sub>5</sub> | C <sub>18</sub> H <sub>14</sub> N <sub>6</sub> O <sub>7</sub> | C <sub>17</sub> H <sub>14</sub> N <sub>4</sub> O <sub>6</sub> | C <sub>19</sub> H <sub>17</sub> FN <sub>4</sub> O <sub>7</sub> |
| Formula weight                                                          | 297.23                                                        | 320.23                                                                       | 426.35                                                        | 370.32                                                        | 432.36                                                         |
| Temperature, K                                                          | 100.0(1)                                                      | 100(2)                                                                       | 100.0(1)                                                      | 100.0(1)                                                      | 100.0(1)                                                       |
| Wavelength, Å                                                           | 1.54184                                                       | 0.71073                                                                      | 1.54184                                                       | 1.54184                                                       | 1.54184                                                        |
| Crystal system                                                          | Triclinic                                                     | Orthorhombic                                                                 | Triclinic                                                     | Triclinic                                                     | Triclinic                                                      |
| Space group                                                             | P $\bar{1}$                                                   | P2 <sub>1</sub> 2 <sub>1</sub> 2 <sub>1</sub>                                | P $\bar{1}$                                                   | P1                                                            | P $\bar{1}$                                                    |
| Unit cell dimensions                                                    |                                                               |                                                                              |                                                               |                                                               |                                                                |
| a, Å                                                                    | 7.74419(6)                                                    | 8.09850(10)                                                                  | 9.04170(10)                                                   | 4.89510(10)                                                   | 10.54644(11)                                                   |
| b, Å                                                                    | 10.79552(10)                                                  | 10.8223(2)                                                                   | 9.63200(10)                                                   | 9.4778(2)                                                     | 12.45588(15)                                                   |
| c, Å                                                                    | 16.71942(16)                                                  | 15.0333(3)                                                                   | 12.3591(2)                                                    | 9.8235(2)                                                     | 16.4948(2)                                                     |
| $\alpha$ , °                                                            | 78.7491(8)                                                    | 90.0                                                                         | 73.5870(10)                                                   | 116.202(2)                                                    | 79.7936(11)                                                    |
| $\beta$ , °                                                             | 78.6511(7)                                                    | 90.0                                                                         | 85.1740(10)                                                   | 92.5690(10)                                                   | 80.1675(10)                                                    |
| $\gamma$ , °                                                            | 70.7659(8)                                                    | 90.0                                                                         | 69.2910(10)                                                   | 96.3260(10)                                                   | 68.9608(10)                                                    |
| Volume, Å <sup>3</sup>                                                  | 1281.08(2)                                                    | 1317.58(4)                                                                   | 965.63(2)                                                     | 404.198(16)                                                   | 1976.80(4)                                                     |
| Z                                                                       | 4                                                             | 4                                                                            | 2                                                             | 1                                                             | 4                                                              |
| Calcd density, g·cm <sup>-3</sup>                                       | 1.541                                                         | 1.614                                                                        | 1.466                                                         | 1.521                                                         | 1.453                                                          |
| $\mu$ , mm <sup>-1</sup>                                                | 1.138                                                         | 0.152                                                                        | 0.993                                                         | 1.003                                                         | 1.019                                                          |
| F(000)                                                                  | 616                                                           | 656                                                                          | 440                                                           | 192                                                           | 896                                                            |
| Crystal size, mm                                                        | 0.71×0.40×0.33                                                | 0.50×0.29×0.24                                                               | 0.11×0.08×0.06                                                | 0.41×0.24×0.09                                                | 0.21×0.13×0.11                                                 |
| $\theta$ range, °                                                       | 2.723–7.850                                                   | 2.319–33.740                                                                 | 3.729–77.897                                                  | 5.046–77.748                                                  | 2.741–77.857                                                   |
| Completeness $\theta_{\text{full}} / \theta_{\text{max}}$               | 0.999 / 0.992                                                 | 0.999 / 1.000                                                                | 0.999 / 0.989                                                 | 1.000 / 0.984                                                 | 1.000 / 0.992                                                  |
|                                                                         |                                                               |                                                                              |                                                               |                                                               |                                                                |
| Index ranges                                                            | -8 ≤ h ≤ 9,<br>-13 ≤ k ≤ 13,<br>-21 ≤ l ≤ 21                  | -12 ≤ h ≤ 12,<br>-16 ≤ k ≤ 16,<br>-23 ≤ l ≤ 23                               | -11 ≤ h ≤ 11,<br>-12 ≤ k ≤ 12,<br>-15 ≤ l ≤ 15                | -6 ≤ h ≤ 5,<br>-11 ≤ k ≤ 11,<br>-12 ≤ l ≤ 12                  | -13 ≤ h ≤ 11,<br>-15 ≤ k ≤ 15,<br>-20 ≤ l ≤ 20                 |
| Reflections                                                             |                                                               |                                                                              |                                                               |                                                               |                                                                |
| collected                                                               | 32895                                                         | 48435                                                                        | 21004                                                         | 16296                                                         | 52168                                                          |
| independent [R <sub>int</sub> ]                                         | 5411 [0.0386]                                                 | 5269 [0.0392]                                                                | 4097 [0.0320]                                                 | 3174 [0.0402]                                                 | 8381 [0.0268]                                                  |
| observed, I>2 $\sigma$ (I)                                              | 5309                                                          | 4804                                                                         | 3844                                                          | 3160                                                          | 7985                                                           |
| T <sub>max</sub> / T <sub>min</sub>                                     | 0.802 / 0.603                                                 | 0.6957 / 0.6630                                                              | 0.956 / 0.934                                                 | 0.773 / 0.451                                                 | 0.927 / 0.869                                                  |
| Data / restr. / param.                                                  | 5411 / 0 / 466                                                | 5269 / 0 / 243                                                               | 4097 / 4 / 346                                                | 3174 / 3 / 300                                                | 8381 / 0 / 696                                                 |
| GooF on F <sup>2</sup>                                                  | 1.063                                                         | 1.064                                                                        | 1.025                                                         | 1.085                                                         | 1.038                                                          |
| R1/wR2 (I>2 $\sigma$ (I))                                               | 0.0362 / 0.0953                                               | 0.0320 / 0.0772                                                              | 0.0416 / 0.1133                                               | 0.0284 / 0.0773                                               | 0.0314 / 0.0841                                                |
| R1/wR2 (all data)                                                       | 0.0368 / 0.0958                                               | 0.0378 / 0.0811                                                              | 0.0434 / 0.1148                                               | 0.0284 / 0.0773                                               | 0.0326 / 0.0851                                                |
| Extinction coeff.                                                       | 0.0057(4)                                                     | -                                                                            | -                                                             | -                                                             | 0.00088(11)                                                    |
| Flack x                                                                 | -                                                             | 0.03(17)                                                                     | -                                                             | 0.15(9)                                                       | -                                                              |
| $\Delta\rho_{\text{max}} / \Delta\rho_{\text{min}}$ , e·Å <sup>-3</sup> | 0.350 / -0.243                                                | 0.330 / -0.227                                                               | 0.360 / -0.295                                                | 0.165 / -0.194                                                | 0.297 / -0.196                                                 |
| CCDC number                                                             | 2232898                                                       | 2232899                                                                      | 2232900                                                       | 2232901                                                       | 2232902                                                        |

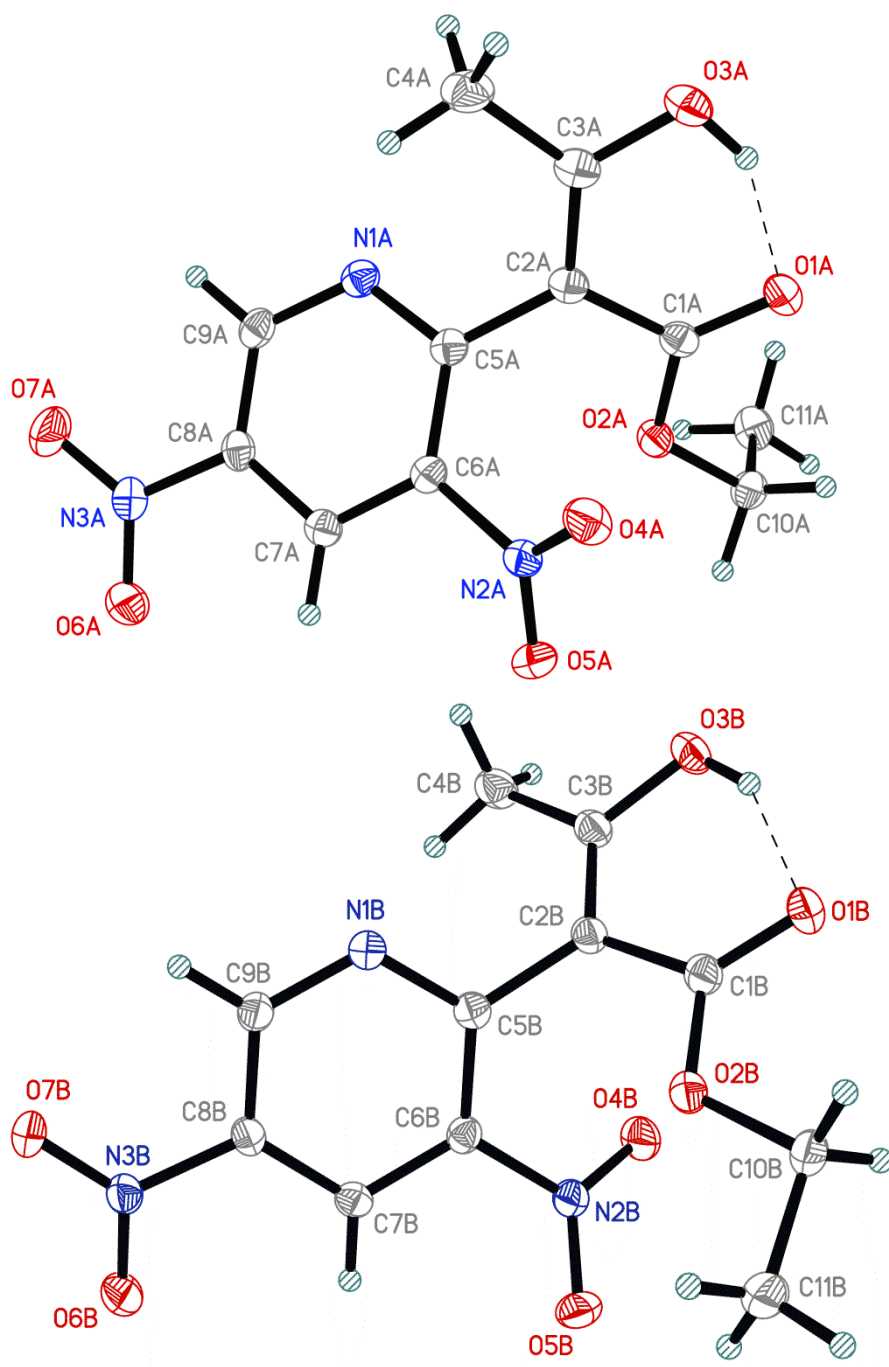

**Figure S1.** Structures of two crystallographically non-equivalent molecules in crystals of **2a**. A thermal ellipsoids probability level is set to 50%.

**Table S2.** Selected bond distances for **2a**, Å

|          |            |         |            |         |            |
|----------|------------|---------|------------|---------|------------|
| O1A-C1A  | 1.2317(15) | O7A-N3A | 1.2242(15) | C2A-C5A | 1.4790(16) |
| O2A-C1A  | 1.3290(14) | N1A-C5A | 1.3454(15) | C3A-C4A | 1.4917(18) |
| O2A-C10A | 1.4609(14) | N1A-C9A | 1.3333(16) | C5A-C6A | 1.4061(16) |
| O3A-C3A  | 1.3312(15) | N2A-C6A | 1.4671(14) | C6A-C7A | 1.3779(16) |
| O4A-N2A  | 1.2273(14) | N3A-C8A | 1.4649(15) | C7A-C8A | 1.3802(17) |
| O5A-N2A  | 1.2249(14) | C1A-C2A | 1.4634(16) | C8A-C9A | 1.3900(17) |



|          |            |         |            |           |            |
|----------|------------|---------|------------|-----------|------------|
| O6A-N3A  | 1.2252(15) | C2A-C3A | 1.3719(16) | C10A-C11A | 1.5042(17) |
| O1B-C1B  | 1.2289(15) | O7B-N3B | 1.2258(14) | C2B-C5B   | 1.4826(15) |
| O2B-C1B  | 1.3330(15) | N1B-C5B | 1.3479(15) | C3B-C4B   | 1.4912(17) |
| O2B-C10B | 1.4585(14) | N1B-C9B | 1.3338(15) | C5B-C6B   | 1.4026(16) |
| O3B-C3B  | 1.3402(14) | N2B-C6B | 1.4718(14) | C6B-C7B   | 1.3836(16) |
| O4B-N2B  | 1.2244(13) | N3B-C8B | 1.4627(14) | C7B-C8B   | 1.3785(16) |
| O5B-N2B  | 1.2238(14) | C1B-C2B | 1.4617(16) | C8B-C9B   | 1.3880(16) |
| O6B-N3B  | 1.2274(14) | C2B-C3B | 1.3598(17) | C10B-C11B | 1.5027(18) |

**Table S2.** Hydrogen bond parameters for **2a**, Å and °.

| D-H...A       | d(D-H)  | d(H...A) | d(D...A)   | <(DHA)    |
|---------------|---------|----------|------------|-----------|
| O3A-H3A...O1A | 0.91(2) | 1.72(2)  | 2.5483(13) | 150.9(18) |
| O3B-H3B...O1B | 0.87(2) | 1.78(2)  | 2.5745(13) | 150.1(18) |

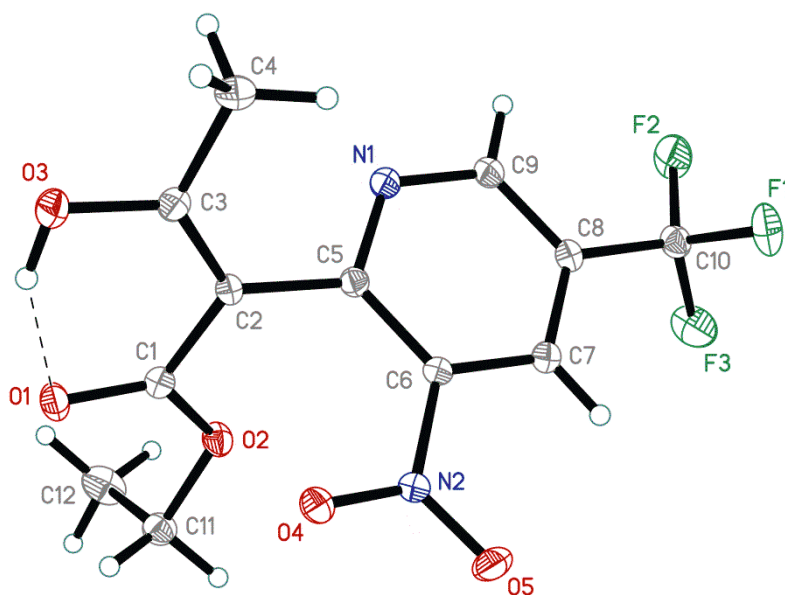

**Figure S2.** The crystal structure of **2b** (p=50%).

**Table S3.** Selected bond distances for **2b**, Å

|        |            |        |            |         |            |
|--------|------------|--------|------------|---------|------------|
| O1-C1  | 1.2317(16) | C5-N1  | 1.3510(16) | C9-N1   | 1.3389(17) |
| O2-C1  | 1.3336(16) | C5-C6  | 1.4102(17) | N2-O4   | 1.2234(14) |
| O2-C11 | 1.4655(16) | C6-C7  | 1.3824(17) | N2-O5   | 1.2273(15) |
| C1-C2  | 1.4626(18) | C6-N2  | 1.4779(16) | C10-F1  | 1.3371(16) |
| C2-C3  | 1.3696(18) | C7-C8  | 1.3898(18) | C10-F2  | 1.3379(16) |
| C2-C5  | 1.4776(17) | C8-C9  | 1.3869(18) | C10-F3  | 1.3382(17) |
| C3-O3  | 1.3346(16) | C8-C10 | 1.4979(18) | C11-C12 | 1.505(2)   |
| C3-C4  | 1.4929(19) |        |            |         |            |

**Table S4.** Hydrogen bond parameters for **2b**, Å and °.

| D-H...A      | d(D-H)  | d(H...A) | d(D...A)   | <(DHA) |
|--------------|---------|----------|------------|--------|
| O3-H3...O1   | 0.90(3) | 1.74(3)  | 2.5674(15) | 151(3) |
| O3-H3...O5#1 | 0.90(3) | 2.45(3)  | 2.9027(16) | 111(2) |

Symmetry transformation used to generate equivalent atoms: #1 -x+3/2, -y+1, +z+1/2.

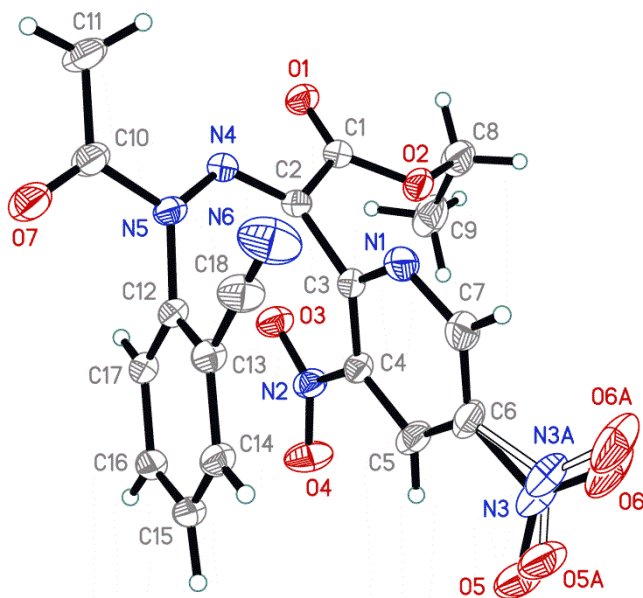**Figure S3.** The crystal structure of **5a'** (p=50%). The disorder ratio for atoms N3, O5, O6 and N3A, O5A, O6A is 0.786(14):0.214(14).**Table S5.** Selected bond distances for **5a'**, Å

|       |            |         |            |         |            |
|-------|------------|---------|------------|---------|------------|
| C1-O1 | 1.2024(16) | C6-N3   | 1.4732(19) | N5-C12  | 1.4409(15) |
| C1-O2 | 1.3347(16) | C6-N3A  | 1.477(3)   | C10-O7  | 1.2126(18) |
| C1-C2 | 1.5096(18) | C7-N1   | 1.3367(19) | C10-C11 | 1.4972(19) |
| O2-C8 | 1.4677(18) | N2-O3   | 1.2266(15) | C12-C13 | 1.3996(18) |
| C2-C3 | 1.5038(17) | N2-O4   | 1.2260(15) | C12-C17 | 1.3817(18) |
| C2-N4 | 1.2819(17) | N3-O5   | 1.227(3)   | C13-C14 | 1.3976(18) |
| C3-C4 | 1.4008(18) | N3-O6   | 1.209(3)   | C13-C18 | 1.4396(19) |
| C3-N1 | 1.3355(17) | N3A-O5A | 1.228(4)   | C14-C15 | 1.387(2)   |
| C4-C5 | 1.3831(18) | N3A-O6A | 1.211(4)   | C15-C16 | 1.390(2)   |
| C4-N2 | 1.4645(17) | C8-C9   | 1.499(3)   | C16-C17 | 1.3940(18) |
| C5-C6 | 1.375(2)   | N4-N5   | 1.3737(15) | C18-N6  | 1.147(2)   |
| C6-C7 | 1.382(2)   | N5-C10  | 1.3984(17) |         |            |

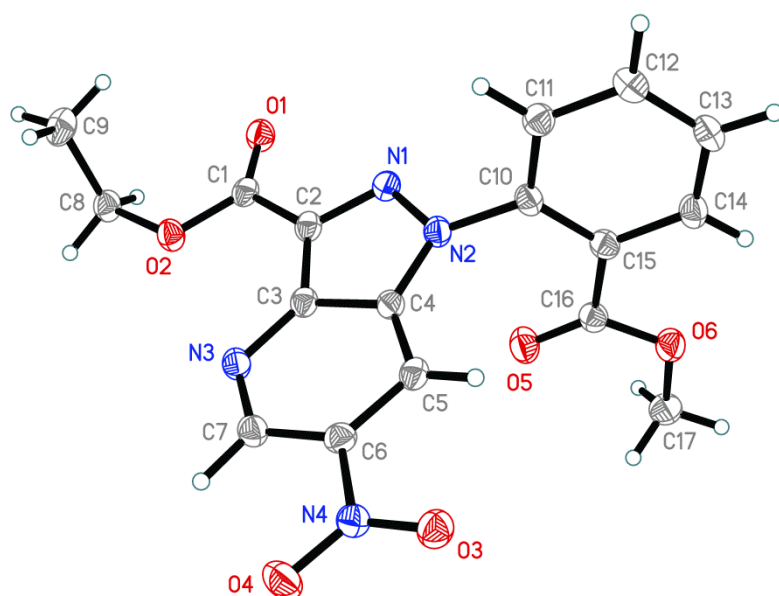

**Figure S4.** The crystal structure of **5c** (p=50%).

**Table S6.** Selected bond distances for **5c**, Å

|        |          |        |          |         |          |
|--------|----------|--------|----------|---------|----------|
| O1-C1  | 1.206(3) | N2-C4  | 1.372(3) | C6-C7   | 1.414(3) |
| O2-C1  | 1.340(3) | N2-C10 | 1.438(3) | C8-C9   | 1.505(3) |
| O2-C8  | 1.460(3) | N3-C3  | 1.356(3) | C10-C11 | 1.385(3) |
| O3-N4  | 1.228(3) | N3-C7  | 1.324(3) | C10-C15 | 1.406(3) |
| O4-N4  | 1.229(2) | N4-C6  | 1.465(3) | C11-C12 | 1.393(3) |
| O5-C16 | 1.211(3) | C1-C2  | 1.481(3) | C12-C13 | 1.385(3) |
| O6-C16 | 1.334(3) | C2-C3  | 1.424(3) | C13-C14 | 1.387(3) |
| O6-C17 | 1.448(3) | C3-C4  | 1.408(3) | C14-C15 | 1.400(3) |
| N1-N2  | 1.345(3) | C4-C5  | 1.393(3) | C15-C16 | 1.493(3) |
| N1-C2  | 1.334(3) | C5-C6  | 1.378(3) |         |          |

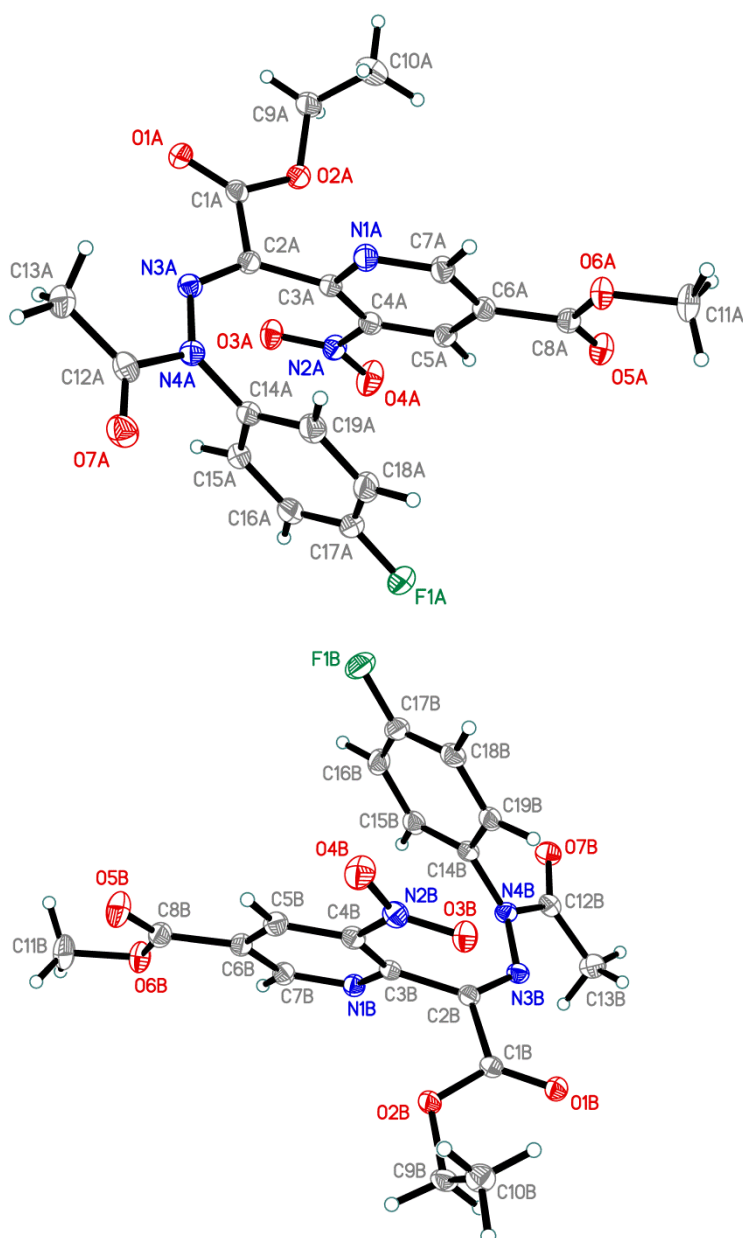

**Figure S5.** The crystal structure of **5q'** (p=50%). Two crystallographically non-equivalent molecules are shown.

**Table S7.** Selected bond distances for **5q'**, Å

|          |            |          |            |           |            |
|----------|------------|----------|------------|-----------|------------|
| F1A-C17A | 1.3621(12) | N1A-C7A  | 1.3366(13) | C6A-C7A   | 1.3909(14) |
| O1A-C1A  | 1.2036(12) | N2A-C4A  | 1.4668(13) | C6A-C8A   | 1.4971(13) |
| O2A-C1A  | 1.3291(12) | N3A-N4A  | 1.3725(11) | C9A-C10A  | 1.4972(16) |
| O2A-C9A  | 1.4602(12) | N3A-C2A  | 1.2817(13) | C12A-C13A | 1.5034(15) |
| O3A-N2A  | 1.2270(11) | N4A-C12A | 1.3998(13) | C14A-C15A | 1.3864(15) |
| O4A-N2A  | 1.2228(12) | N4A-C14A | 1.4428(13) | C14A-C19A | 1.3906(14) |
| O5A-C8A  | 1.2051(13) | C1A-C2A  | 1.5086(13) | C15A-C16A | 1.3895(15) |
| O6A-C8A  | 1.3315(12) | C2A-C3A  | 1.5060(13) | C16A-C17A | 1.3771(17) |
| O6A-C11A | 1.4532(12) | C3A-C4A  | 1.3965(14) | C17A-C18A | 1.3778(19) |

|          |            |          |            |           |            |
|----------|------------|----------|------------|-----------|------------|
| O7A-C12A | 1.2125(13) | C4A-C5A  | 1.3839(14) | C18A-C19A | 1.3900(16) |
| N1A-C3A  | 1.3398(13) | C5A-C6A  | 1.3867(14) |           |            |
| F1B-C17B | 1.3630(12) | N1B-C7B  | 1.3384(12) | C6B-C7B   | 1.3914(14) |
| O1B-C1B  | 1.2032(12) | N2B-C4B  | 1.4664(12) | C6B-C8B   | 1.4963(13) |
| O2B-C1B  | 1.3315(11) | N3B-N4B  | 1.3797(11) | C9B-C10B  | 1.5069(14) |
| O2B-C9B  | 1.4670(11) | N3B-C2B  | 1.2812(12) | C12B-C13B | 1.5011(14) |
| O3B-N2B  | 1.2287(11) | N4B-C12B | 1.3996(12) | C14B-C15B | 1.3897(14) |
| O4B-N2B  | 1.2252(11) | N4B-C14B | 1.4403(12) | C14B-C19B | 1.3907(14) |
| O5B-C8B  | 1.2035(13) | C1B-C2B  | 1.5089(12) | C15B-C16B | 1.3925(15) |
| O6B-C8B  | 1.3312(13) | C2B-C3B  | 1.5007(12) | C16B-C17B | 1.3773(16) |
| O6B-C11B | 1.4558(12) | C3B-C4B  | 1.3966(13) | C17B-C18B | 1.3783(16) |
| O7B-C12B | 1.2149(12) | C4B-C5B  | 1.3829(13) | C18B-C19B | 1.3885(14) |
| N1B-C3B  | 1.3384(13) | C5B-C6B  | 1.3860(14) |           |            |

## NMR spectra of synthesized compounds.

$^1\text{H}$  and  $^{13}\text{C}$  NMR spectra of compound **2a** in  $\text{CDCl}_3$

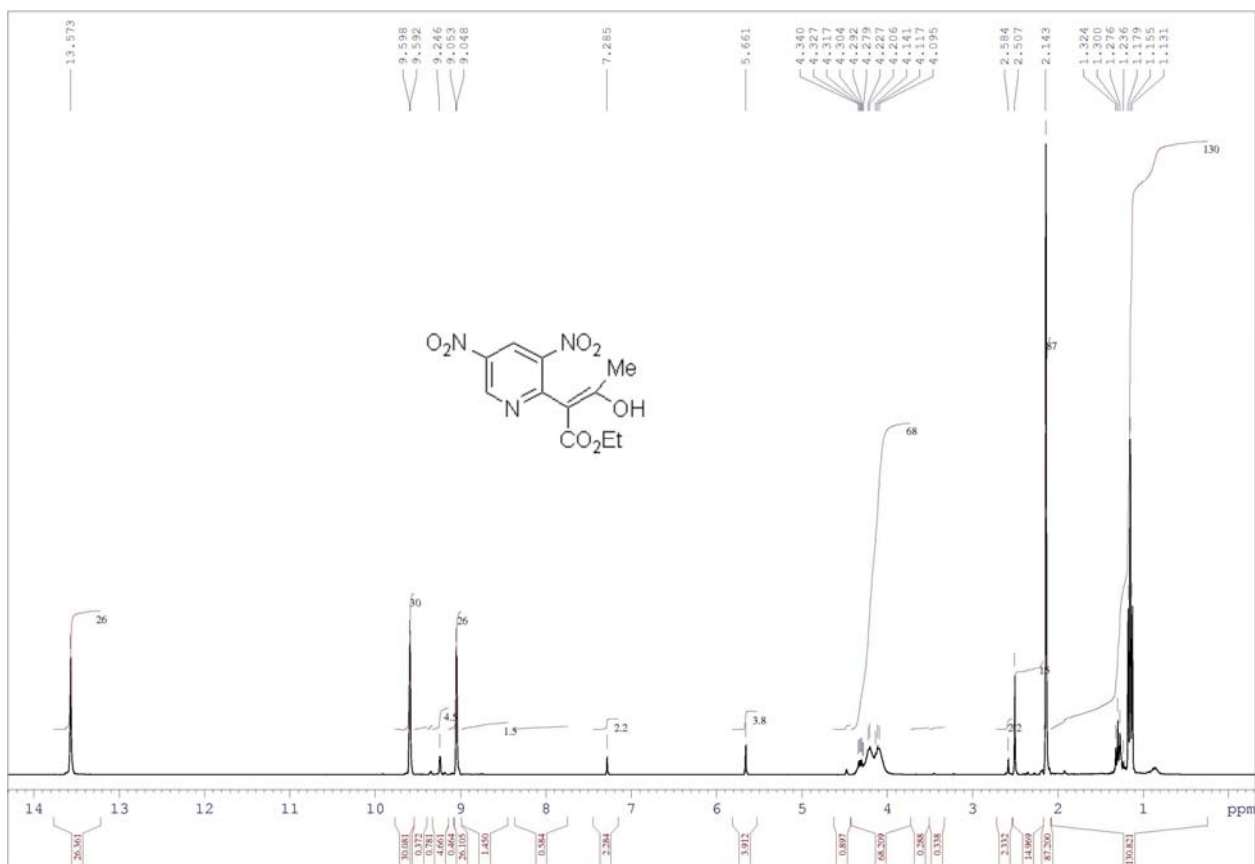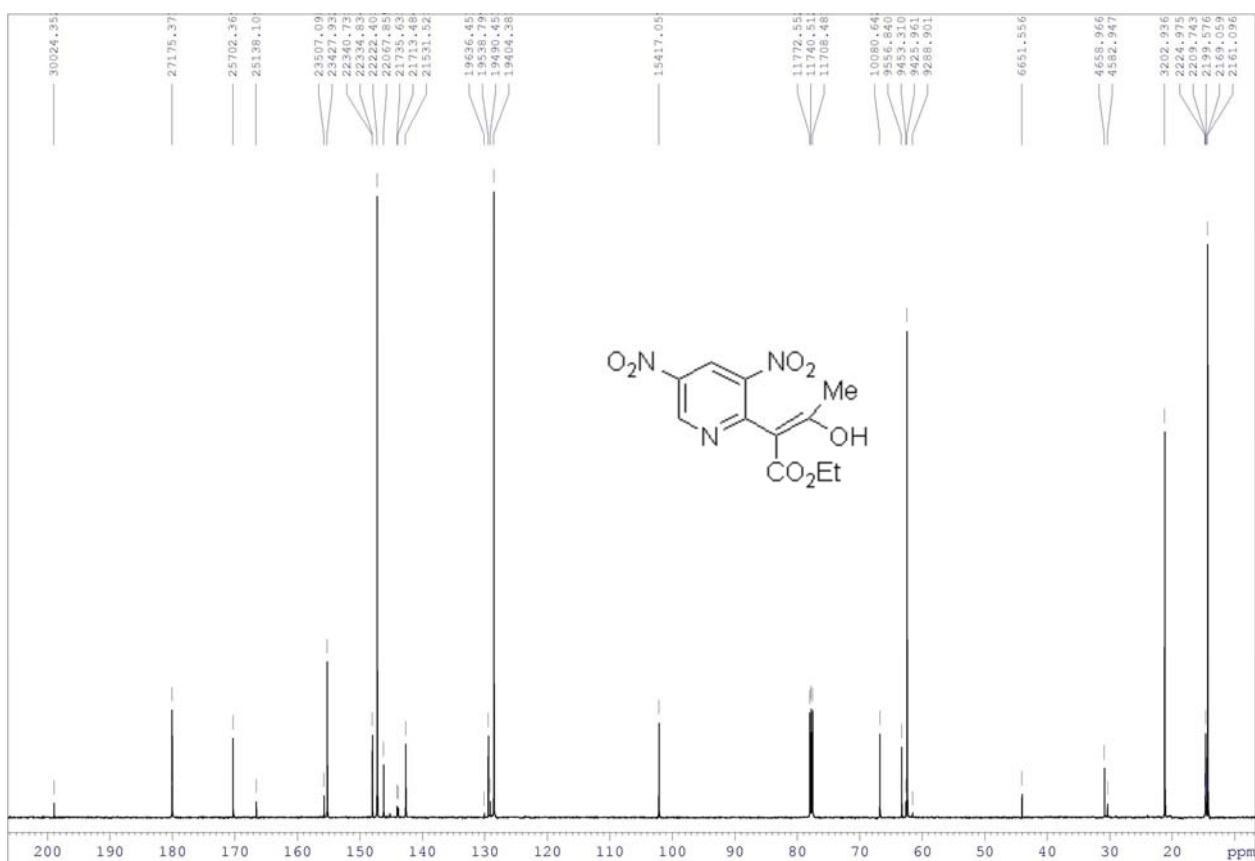

# HRMS spectrum of compound **2a**

## Display Report

### Analysis Info

Analysis Name D:\Data\Kolotyrykina\2022\Bastrakov\0412023.d  
 Method tune\_50-1600\_pos\_15\_12.m  
 Sample Name /LPIK VN-497  
 Comment C11H11N3O7 mH 298.0669 clb added CH3CN

Acquisition Date 12.04.2022 14:37:29

Operator BDAL@DE  
 Instrument / Ser# microTOF 10248

### Acquisition Parameter

|             |            |                      |          |                  |           |
|-------------|------------|----------------------|----------|------------------|-----------|
| Source Type | ESI        | Ion Polarity         | Positive | Set Nebulizer    | 0.4 Bar   |
| Focus       | Not active |                      |          | Set Dry Heater   | 180 °C    |
| Scan Begin  | 50 m/z     | Set Capillary        | 4500 V   | Set Dry Gas      | 4.0 l/min |
| Scan End    | 1600 m/z   | Set End Plate Offset | -500 V   | Set Divert Valve | Waste     |

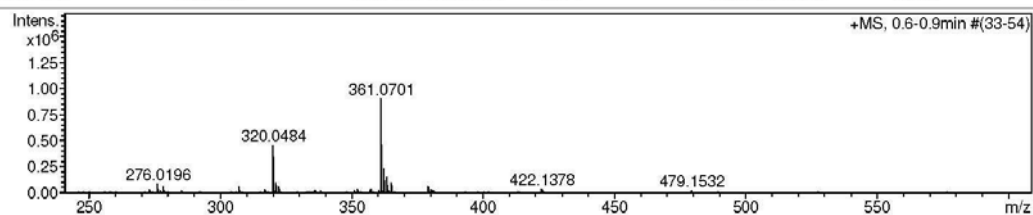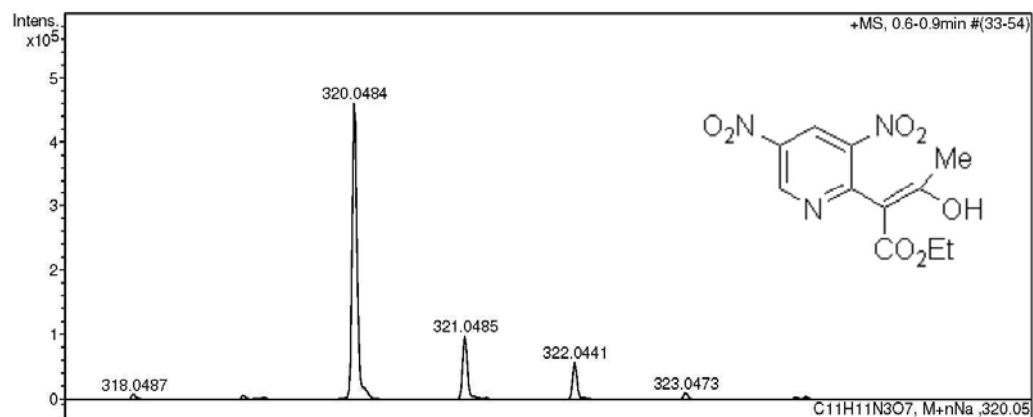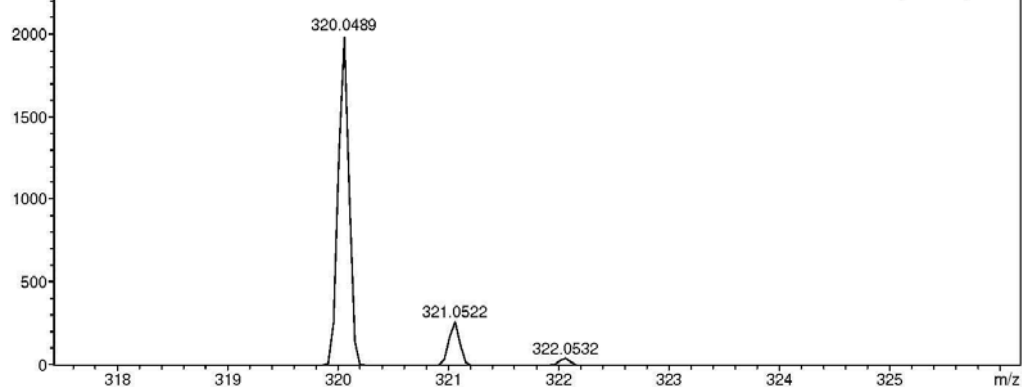

$^1\text{H}$  spectrum of compound **2b** in  $\text{CDCl}_3$

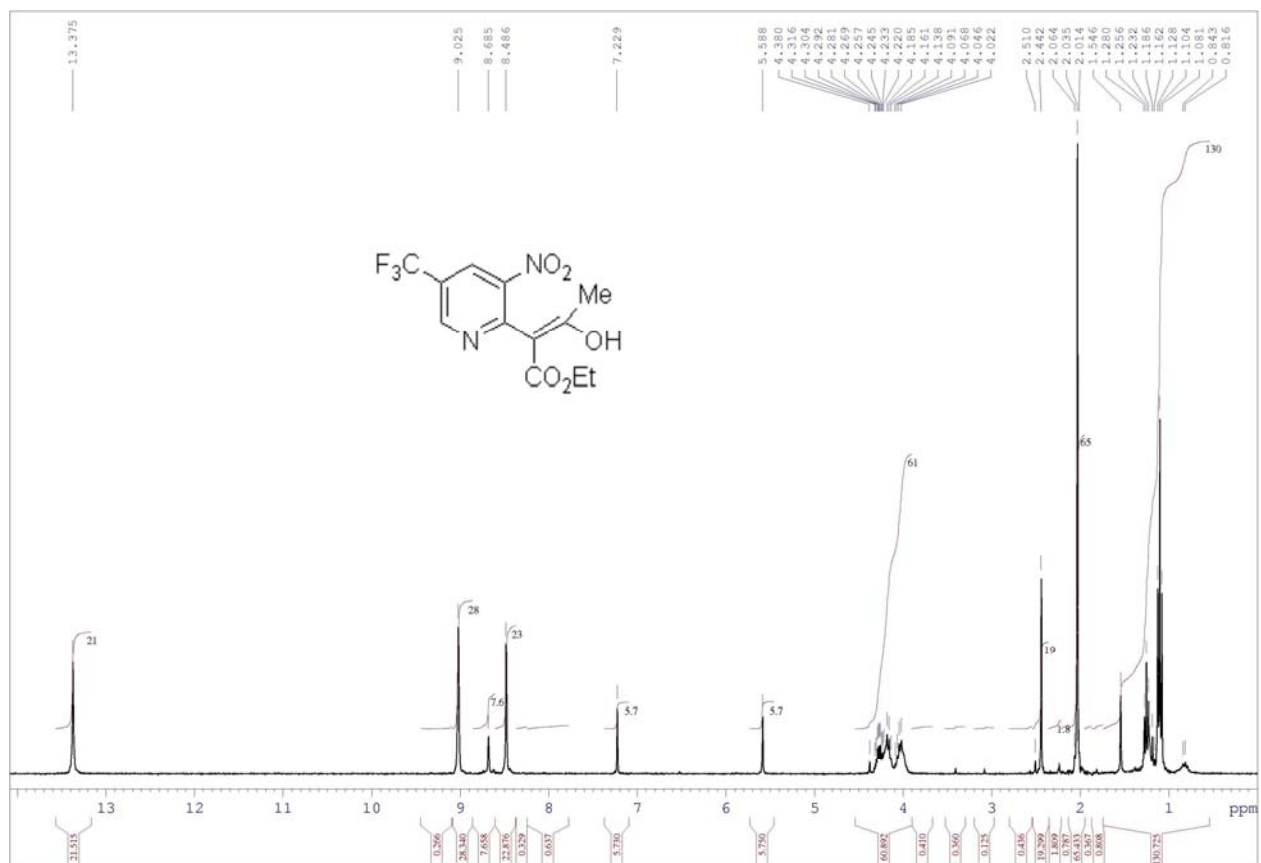



# HRMS spectrum of compound **2b**

## Display Report

### Analysis Info

Analysis Name D:\Data\Kolotyrkina\2022\Bastrakov\1221002.d  
 Method tune\_low.m  
 Sample Name /LPIK VN-583  
 Comment C12H11F3N2O5 mH 321.0692 calibrant added CH3CN

Acquisition Date 21.12.2022 9:40:14  
 Operator BDAL@DE  
 Instrument / Ser# microTOF 10248

### Acquisition Parameter

|             |            |                      |          |                  |           |
|-------------|------------|----------------------|----------|------------------|-----------|
| Source Type | ESI        | Ion Polarity         | Positive | Set Nebulizer    | 0.4 Bar   |
| Focus       | Not active |                      |          | Set Dry Heater   | 180 °C    |
| Scan Begin  | 50 m/z     | Set Capillary        | 4500 V   | Set Dry Gas      | 4.0 l/min |
| Scan End    | 2500 m/z   | Set End Plate Offset | -500 V   | Set Divert Valve | Waste     |

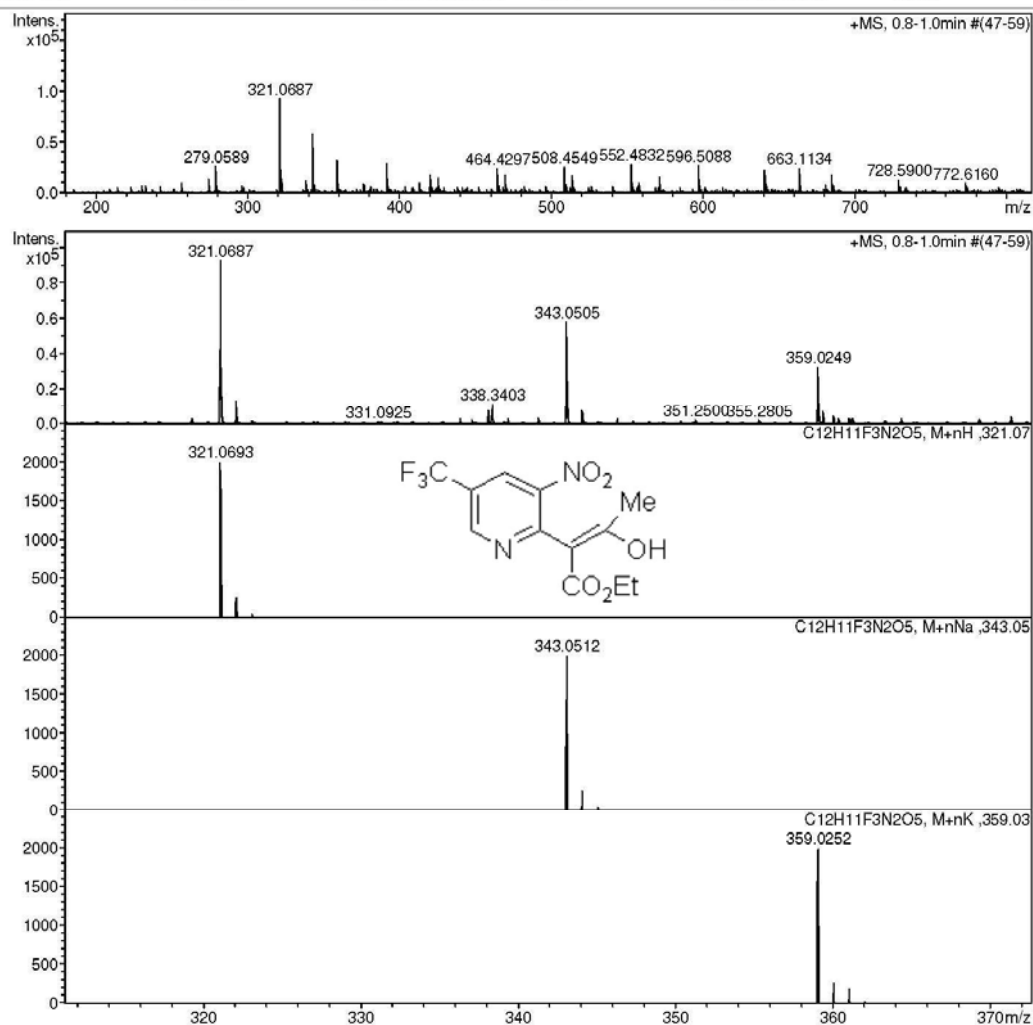

$^1\text{H}$  spectrum of compound **2c** in  $\text{CDCl}_3$

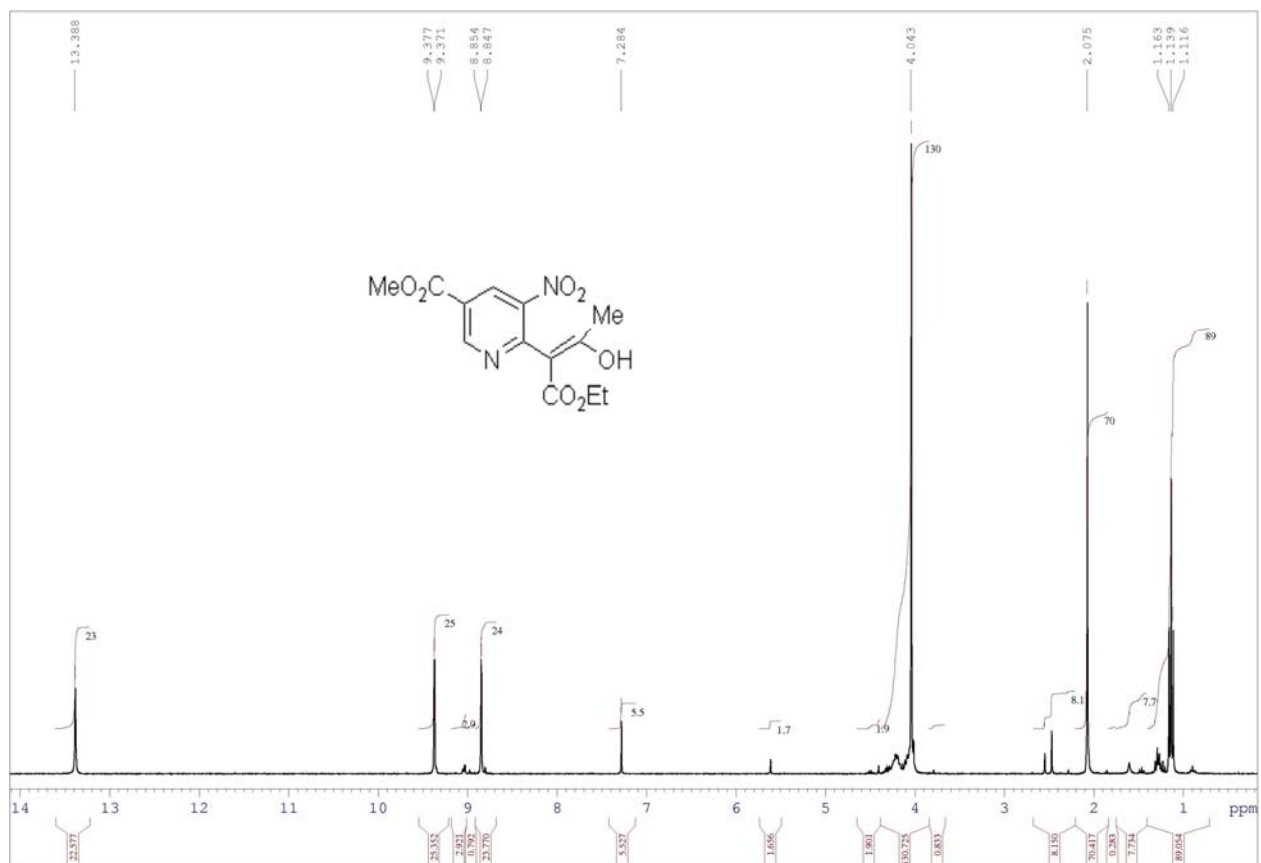

# HRMS spectrum of compound 2c

## Display Report

### Analysis Info

Analysis Name D:\Data\Kolotyrkina\2022\Bastrakov\1221003.d  
 Method tune\_low.m  
 Sample Name /LPIK VN-652  
 Comment C13H14N2O7 mH 311.0873 calibrant added CH3CN

Acquisition Date 21.12.2022 9:48:09

Operator BDAL@DE  
 Instrument / Ser# microTOF 10248

### Acquisition Parameter

|             |            |                      |          |                  |           |
|-------------|------------|----------------------|----------|------------------|-----------|
| Source Type | ESI        | Ion Polarity         | Positive | Set Nebulizer    | 0.4 Bar   |
| Focus       | Not active |                      |          | Set Dry Heater   | 180 °C    |
| Scan Begin  | 50 m/z     | Set Capillary        | 4500 V   | Set Dry Gas      | 4.0 l/min |
| Scan End    | 2500 m/z   | Set End Plate Offset | -500 V   | Set Divert Valve | Waste     |

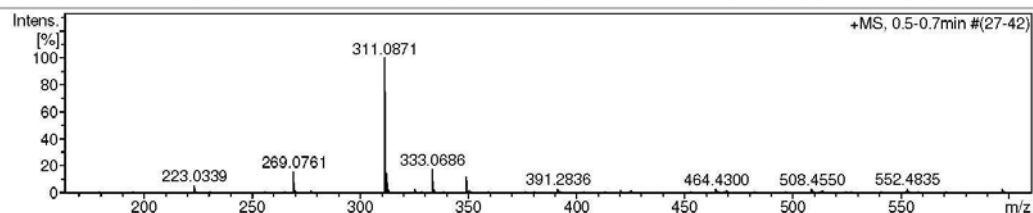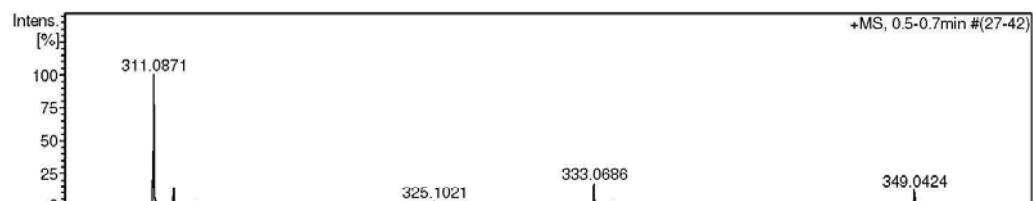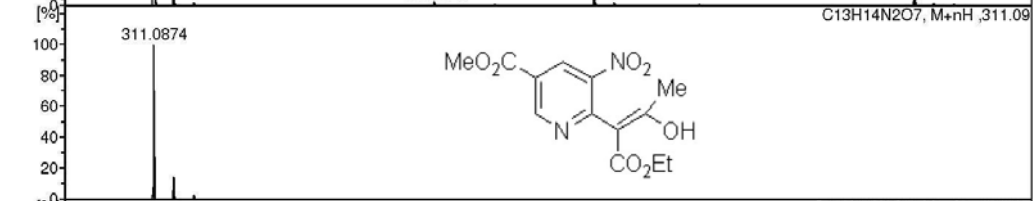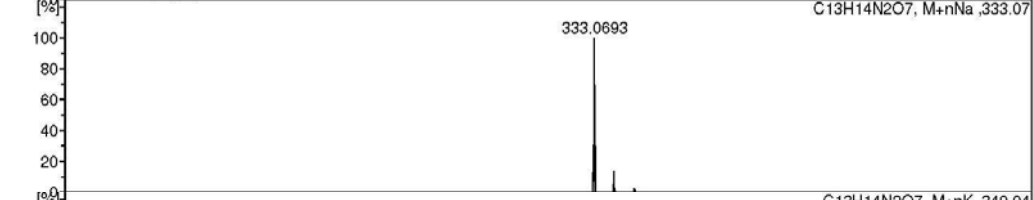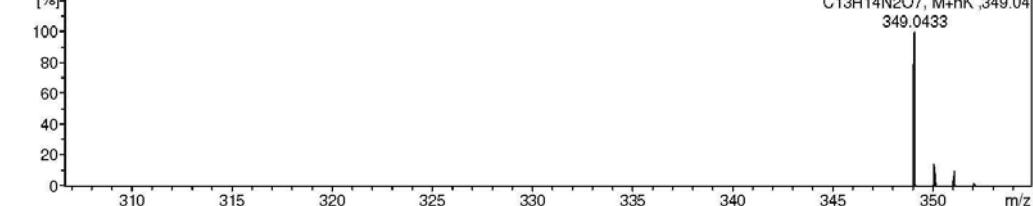

$^1\text{H}$  NMR spectrum of compound **4a** in  $\text{CDCl}_3$

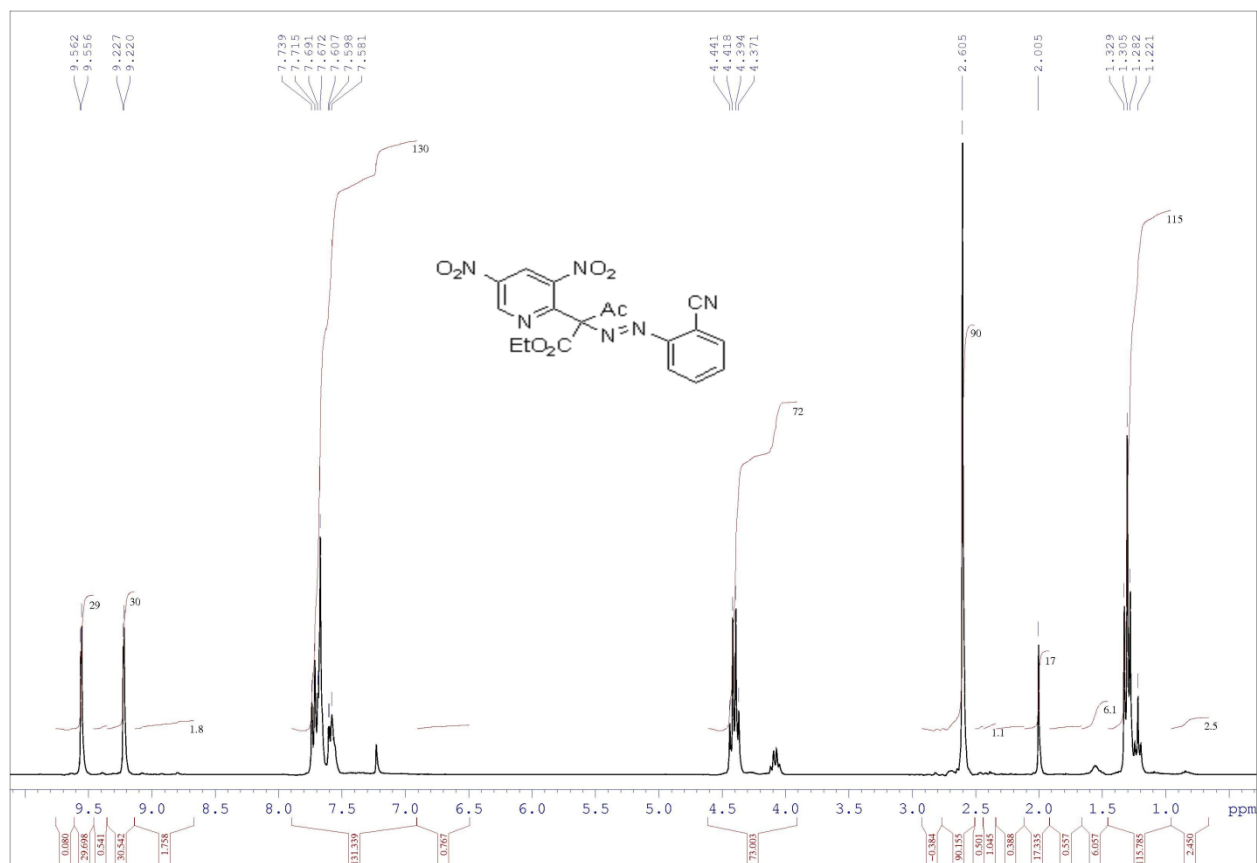

# HRMS spectrum of compound 4a

## Display Report

### Analysis Info

Analysis Name D:\Data\Chizhov\Dalinger\Nikol'skiy\vn-520\_&clblow.d  
 Method tune\_low.m  
 Sample Name /LPIK VN-520  
 Comment CH3OH 100 %, dil. 200, calibrant added

Acquisition Date 24.01.2022 17:23:05

Operator BDAL@DE  
 Instrument / Ser# micrOTOF 10248

### Acquisition Parameter

|             |            |                      |          |                  |           |
|-------------|------------|----------------------|----------|------------------|-----------|
| Source Type | ESI        | Ion Polarity         | Positive | Set Nebulizer    | 0.4 Bar   |
| Focus       | Not active |                      |          | Set Dry Heater   | 180 °C    |
| Scan Begin  | 50 m/z     | Set Capillary        | 4500 V   | Set Dry Gas      | 4.0 l/min |
| Scan End    | 3000 m/z   | Set End Plate Offset | -500 V   | Set Divert Valve | Waste     |

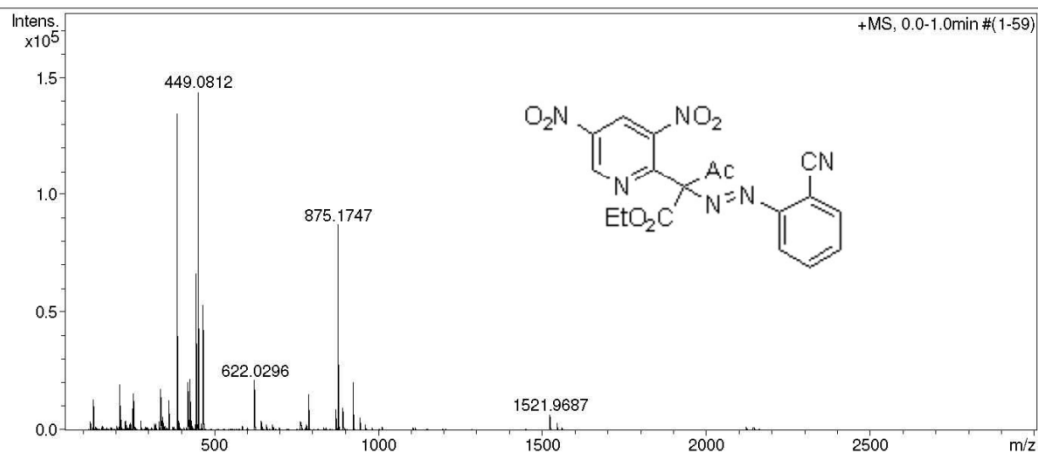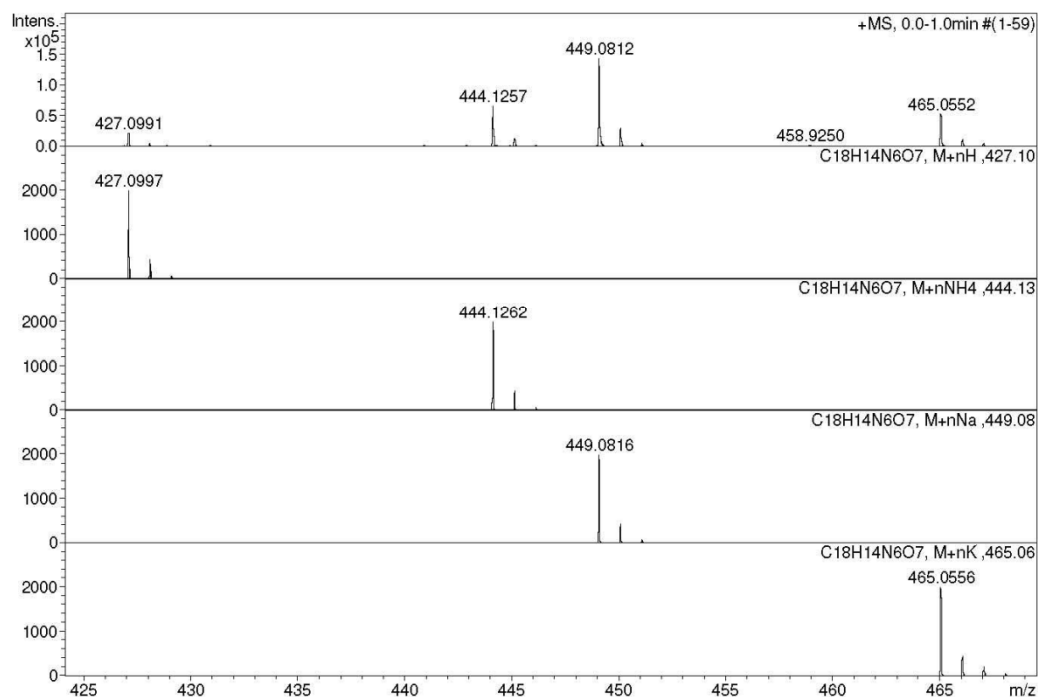

$^1\text{H}$  and  $^{13}\text{C}$  NMR spectra of compound **5a** in  $\text{CDCl}_3$

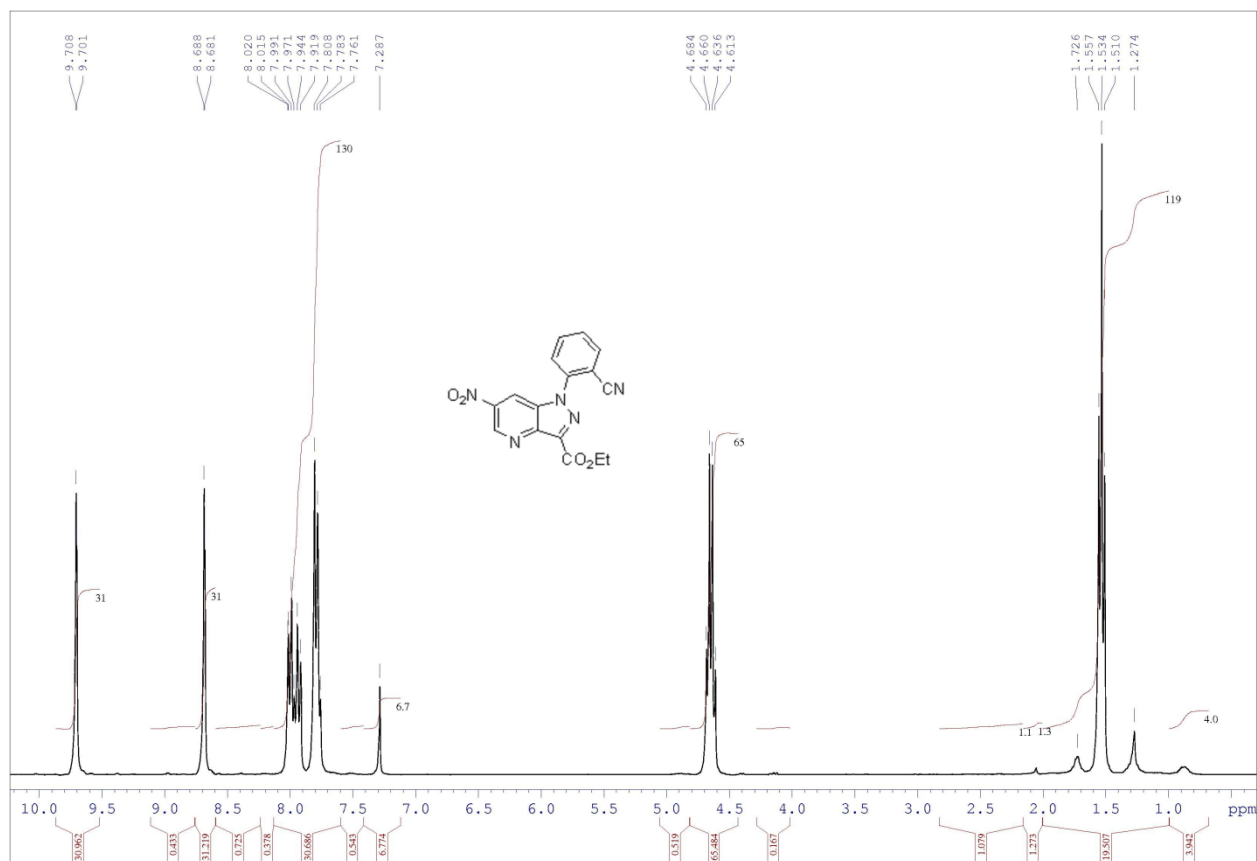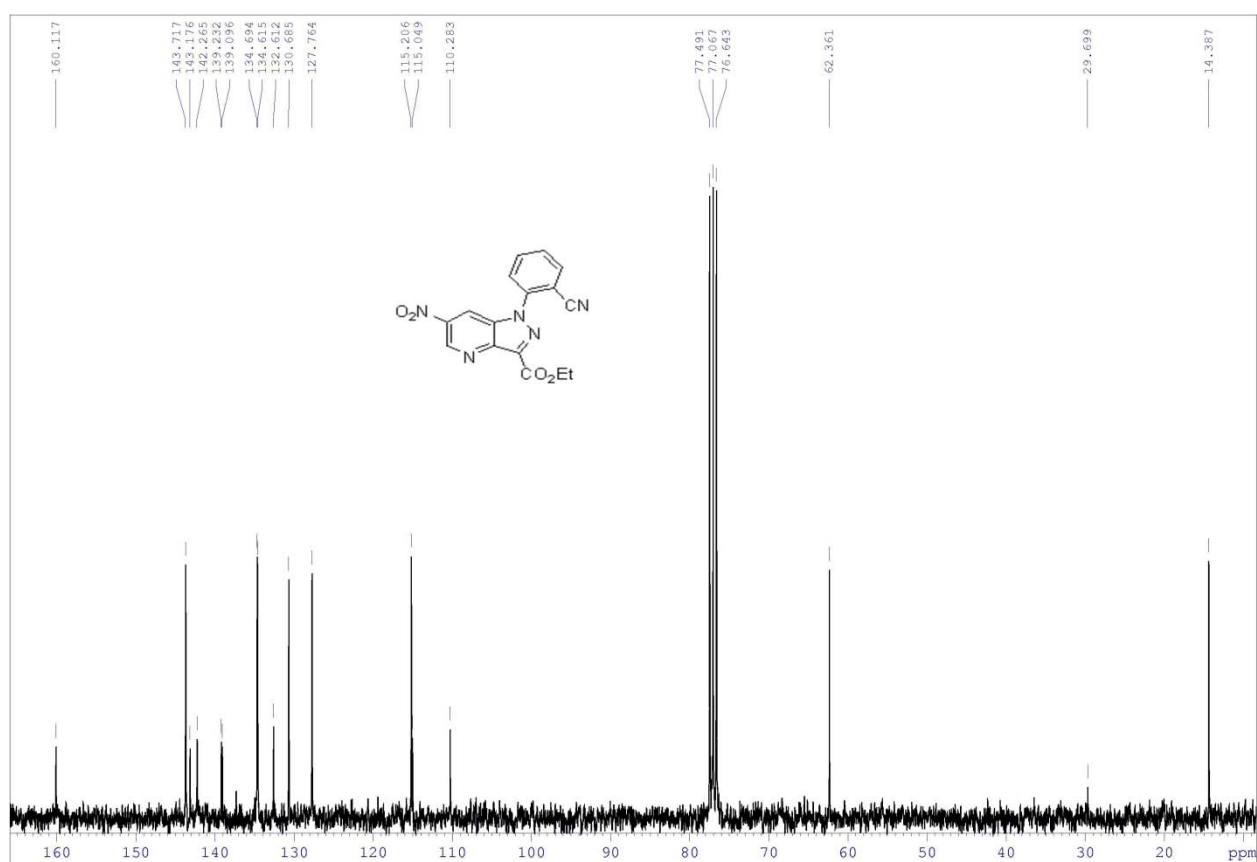

# HRMS spectrum of compound 5a

## Display Report

### Analysis Info

Analysis Name D:\Data\Chizhov\Dalinger\Nikol'skiy\vn-517\_&clblow.d  
 Method tune\_low.m  
 Sample Name /LPIK VN-517  
 Comment CH3OH 100 %, dil. 200, calibrant added

Acquisition Date 24.01.2022 17:16:16

Operator BDAL@DE  
 Instrument / Ser# micrOTOF 10248

### Acquisition Parameter

|             |            |                      |          |                  |           |
|-------------|------------|----------------------|----------|------------------|-----------|
| Source Type | ESI        | Ion Polarity         | Positive | Set Nebulizer    | 0.4 Bar   |
| Focus       | Not active |                      |          | Set Dry Heater   | 180 °C    |
| Scan Begin  | 50 m/z     | Set Capillary        | 4500 V   | Set Dry Gas      | 4.0 l/min |
| Scan End    | 3000 m/z   | Set End Plate Offset | -500 V   | Set Divert Valve | Waste     |

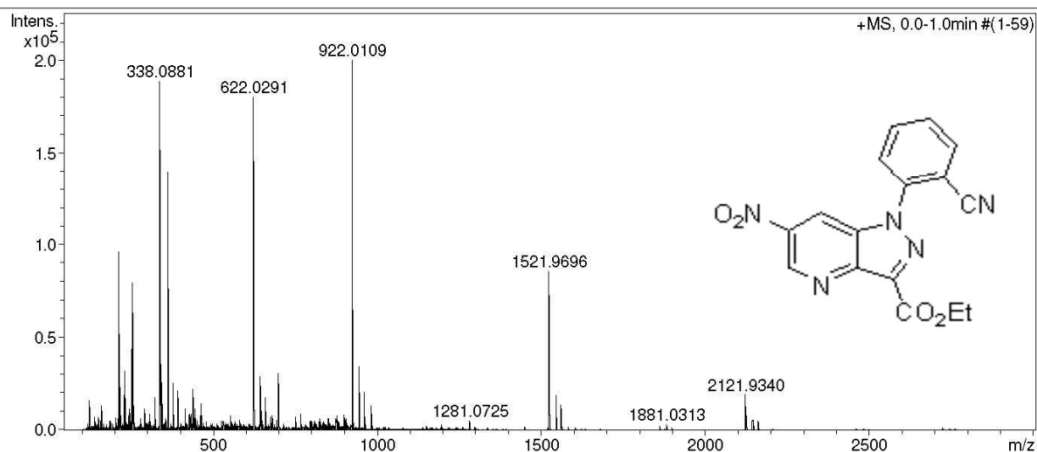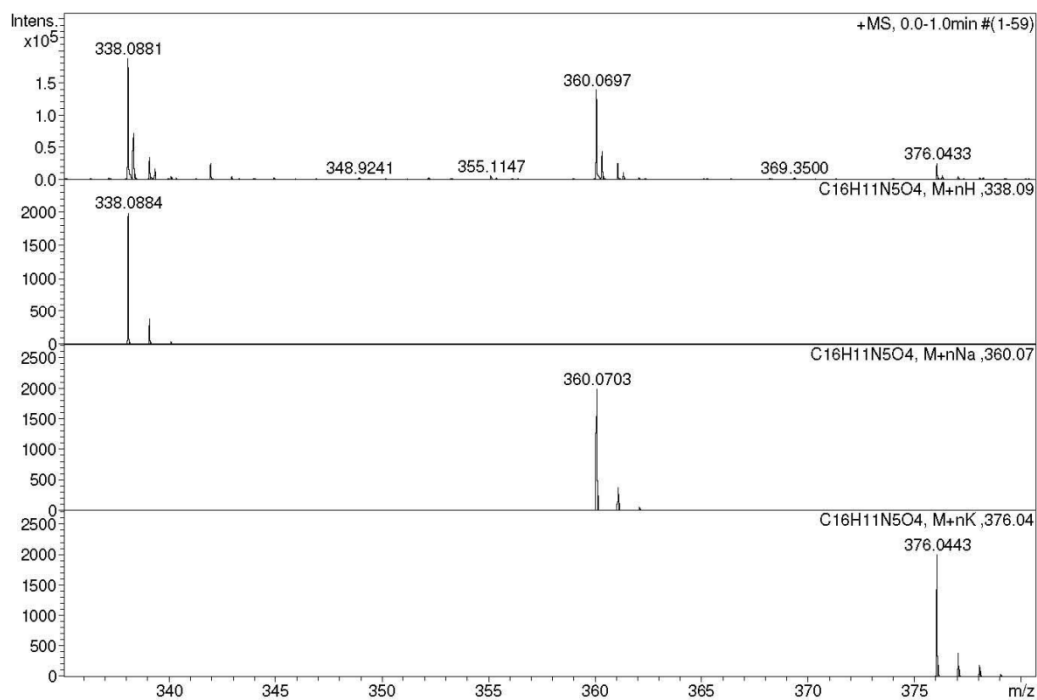

Chemical structure of compound 13a: CCOC(=O)c1cc([N+](=O)[O-])cc([N+](=O)[O-])n1C=C(NC(=O)c2ccccc2C#N)C

<sup>1</sup>H NMR spectrum (CDCl<sub>3</sub>) of compound 13a. The spectrum shows peaks from 0.8 to 9.6 ppm. The chemical structure of 13a is shown above the spectrum. The integration values are provided below the peaks: 29, 29, 1.6, 66.55, 0.97, 84.164, 1.9, 14, 1.7, 24.13, 0.471, 3.39, and 3.4. The list of chemical shifts (ppm) is shown at the top: 9.458, 8.857, 7.425, 7.405, 7.397, 7.268, 7.238, 7.213, 7.190, 7.022, 7.074, 4.374, 4.352, 4.329, 4.307, 4.150, 4.157, 4.132, 4.109, 2.764, 2.482, 2.064, 1.591, 1.574, 1.544, 1.375, 1.351, 1.327, 1.306, 1.282, 1.266, 1.166, 1.140, and 0.881.



# HRMS spectrum of compound 5a'

## Display Report

### Analysis Info

Analysis Name D:\Data\Chizhov\Dalinger\Nikol'skiy\vn-519\_&clblow.d  
 Method tune\_low.m  
 Sample Name /LPIK VN-519  
 Comment CH3OH 100 %, dil. 200, calibrant added

Acquisition Date 24.01.2022 17:20:03

Operator BDAL@DE  
 Instrument / Ser# micrOTOF 10248

### Acquisition Parameter

|             |            |                      |          |                  |           |
|-------------|------------|----------------------|----------|------------------|-----------|
| Source Type | ESI        | Ion Polarity         | Positive | Set Nebulizer    | 0.4 Bar   |
| Focus       | Not active |                      |          | Set Dry Heater   | 180 °C    |
| Scan Begin  | 50 m/z     | Set Capillary        | 4500 V   | Set Dry Gas      | 4.0 l/min |
| Scan End    | 3000 m/z   | Set End Plate Offset | -500 V   | Set Divert Valve | Waste     |

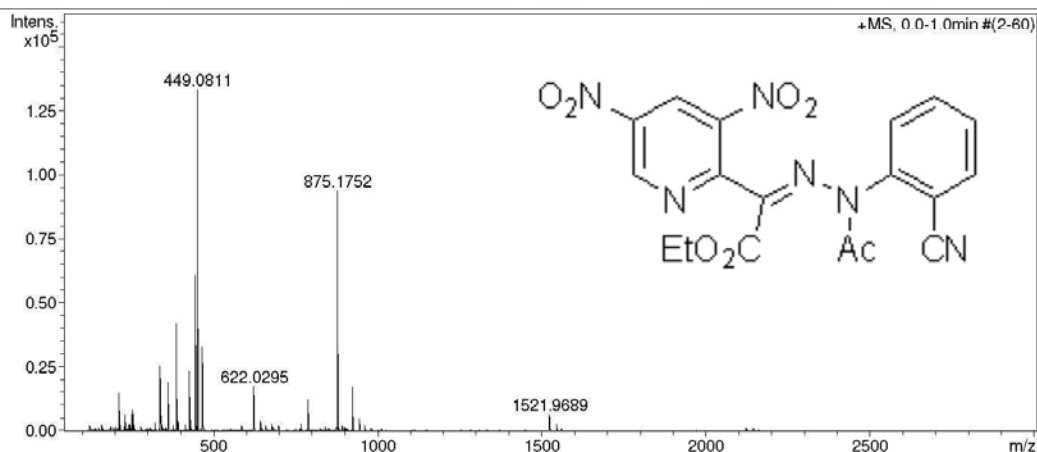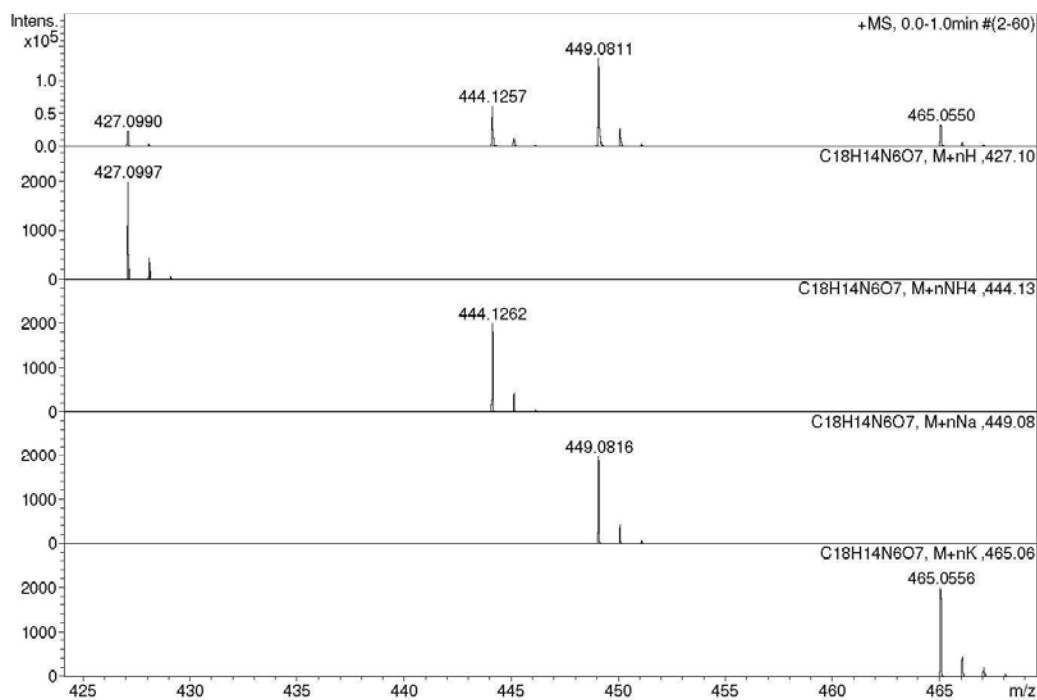

$^1\text{H}$  and  $^{13}\text{C}$  NMR spectra of compound **5b** in  $\text{CDCl}_3$

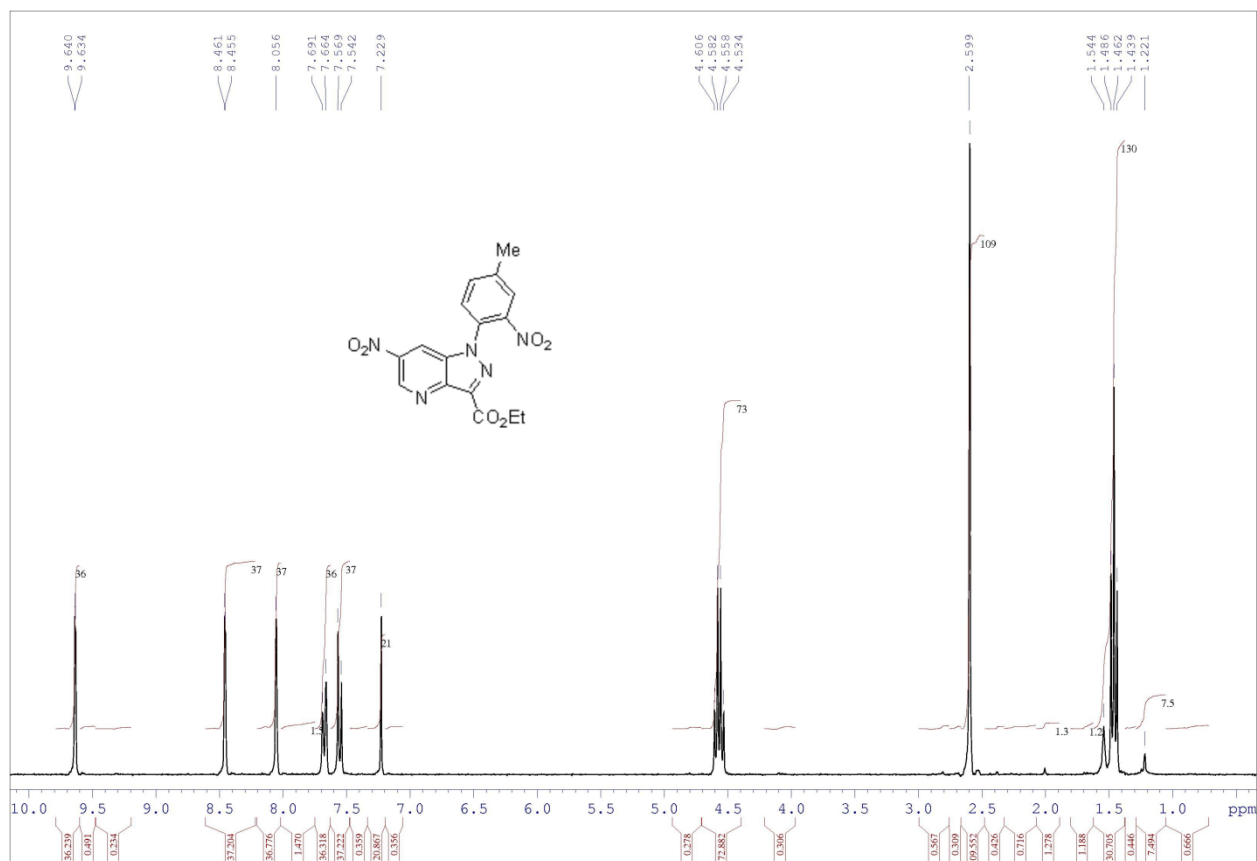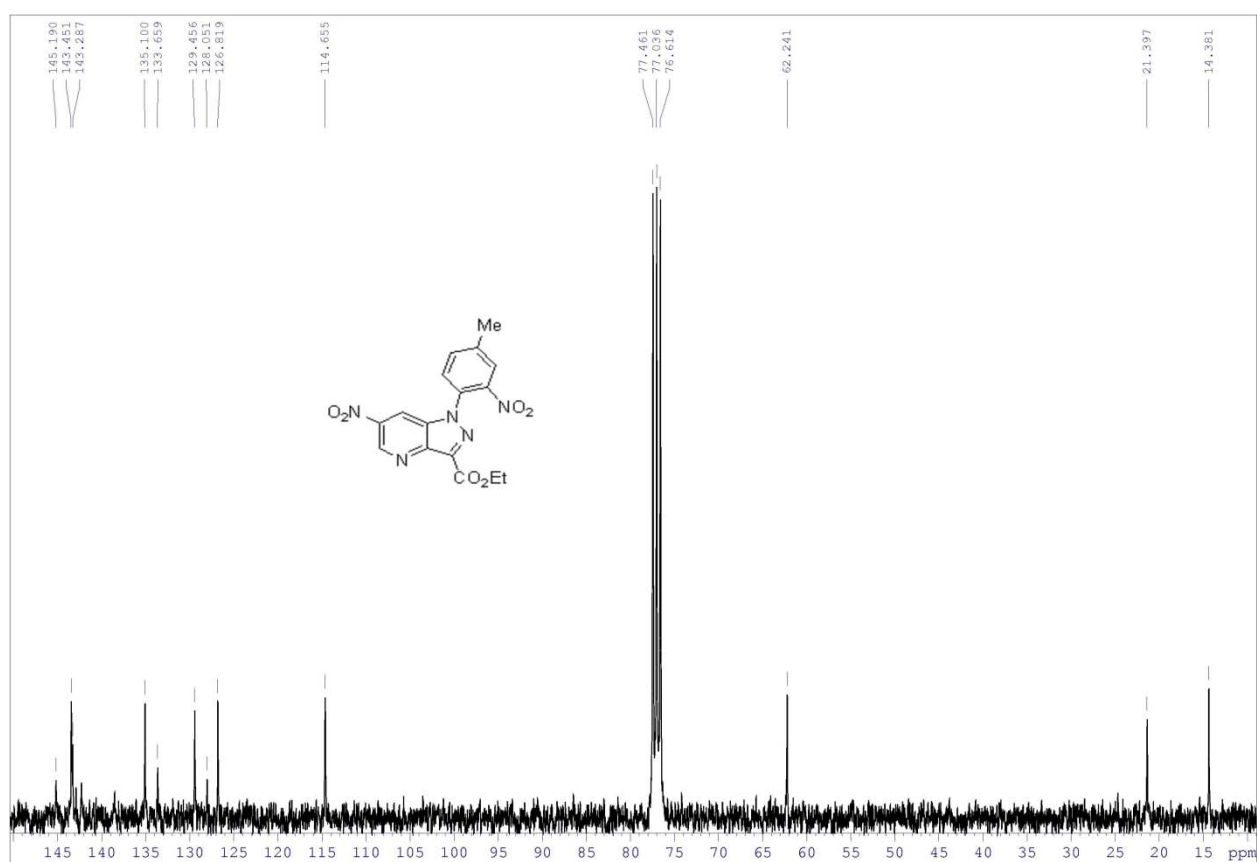

# HRMS spectrum of compound **5b**

## Display Report

### Analysis Info

Analysis Name D:\Data\Kolotyrkina\2022\Bastrakov\0412027.d  
 Method tune\_50-1600\_pos\_15\_12.m  
 Sample Name /LPIK VN-555  
 Comment C16H13N5O6 mH 372.0938 clb added CH3OH

Acquisition Date 12.04.2022 15:12:31

Operator BDAL@DE  
 Instrument / Ser# micrOTOF 10248

### Acquisition Parameter

|             |            |                      |          |                  |           |
|-------------|------------|----------------------|----------|------------------|-----------|
| Source Type | ESI        | Ion Polarity         | Positive | Set Nebulizer    | 0.4 Bar   |
| Focus       | Not active |                      |          | Set Dry Heater   | 180 °C    |
| Scan Begin  | 50 m/z     | Set Capillary        | 4500 V   | Set Dry Gas      | 4.0 l/min |
| Scan End    | 1600 m/z   | Set End Plate Offset | -500 V   | Set Divert Valve | Waste     |

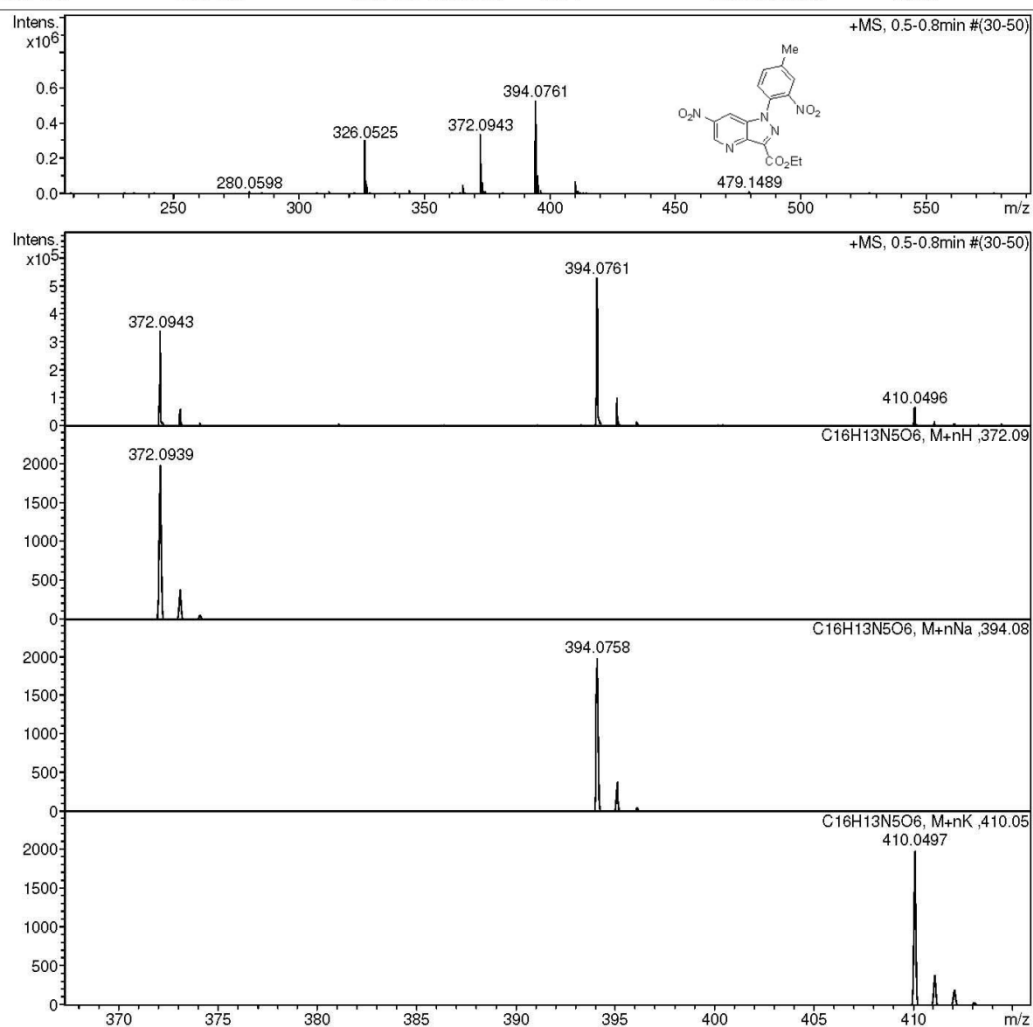

$^1\text{H}$  and  $^{13}\text{C}$  NMR spectra of compound **5c** in  $\text{CDCl}_3$

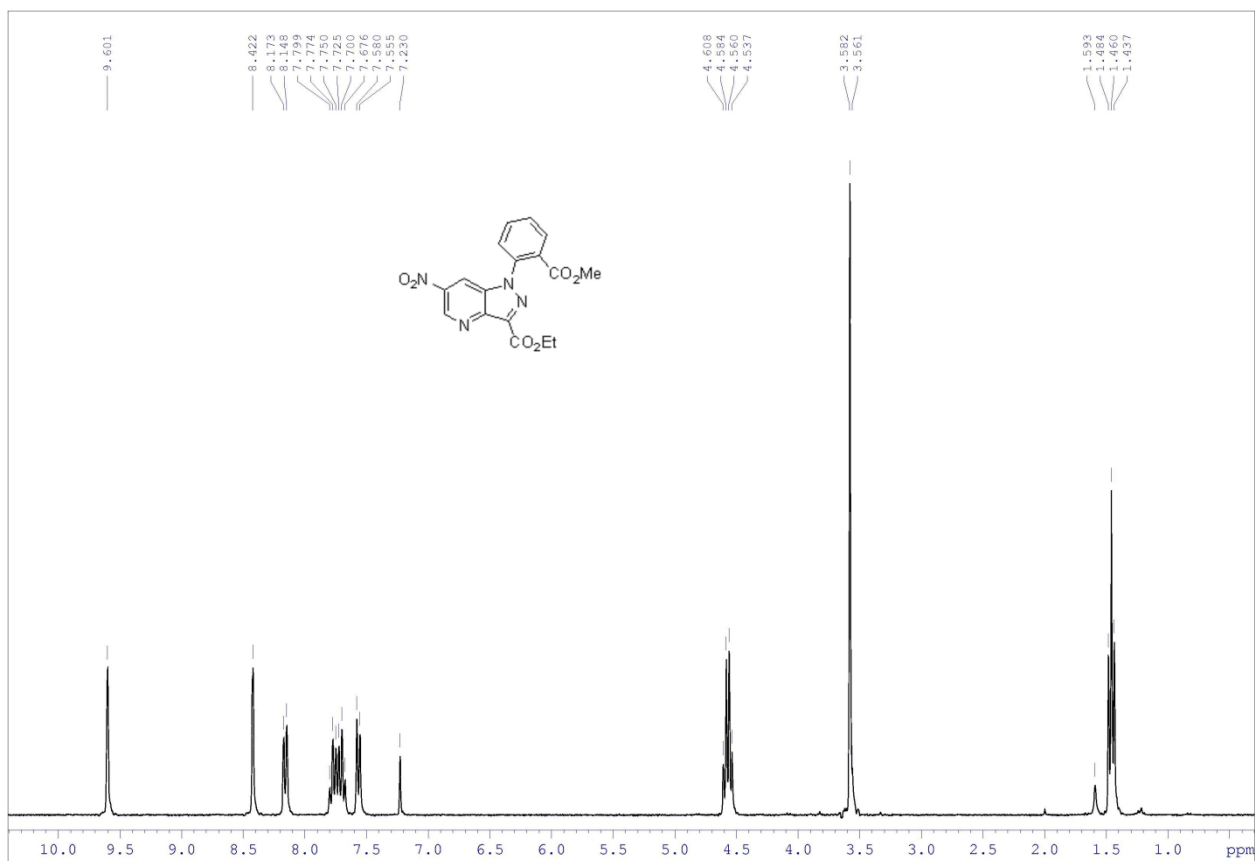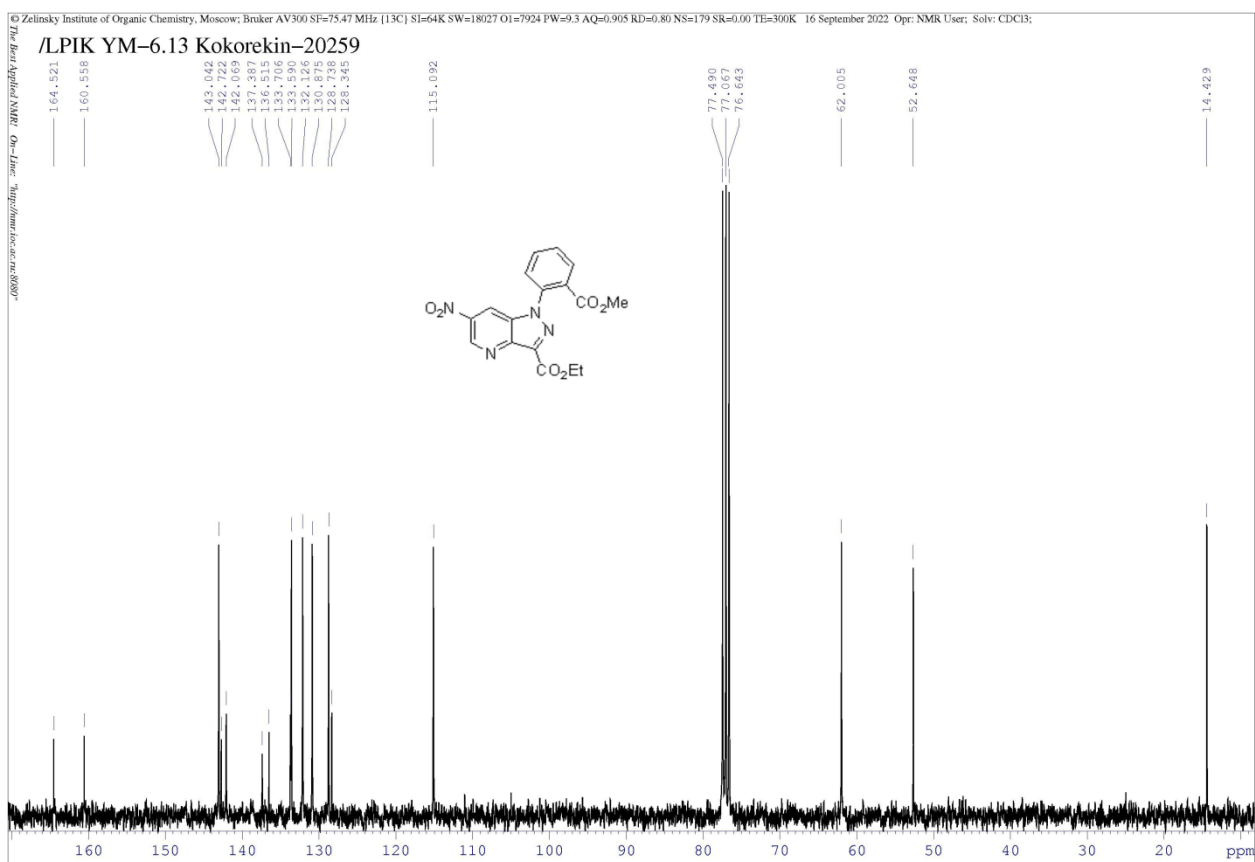

# HRMS spectrum of compound 5c

## Display Report

### Analysis Info

Analysis Name D:\Data\Kolotyrkina\2022\Bastrakov\1129002.d  
Method tune\_wide.m  
Sample Name /LPIK YM-6  
Comment C17H14N4O6 mH 371.0986 calibrant added CH3CN

Acquisition Date 29.11.2022 10:16:26  
Operator BDAL@DE  
Instrument / Ser# micrOTOF 10248

### Acquisition Parameter

|             |            |                      |          |                  |           |
|-------------|------------|----------------------|----------|------------------|-----------|
| Source Type | ESI        | Ion Polarity         | Positive | Set Nebulizer    | 0.4 Bar   |
| Focus       | Not active |                      |          | Set Dry Heater   | 180 °C    |
| Scan Begin  | 50 m/z     | Set Capillary        | 4500 V   | Set Dry Gas      | 4.0 l/min |
| Scan End    | 3000 m/z   | Set End Plate Offset | -500 V   | Set Divert Valve | Waste     |

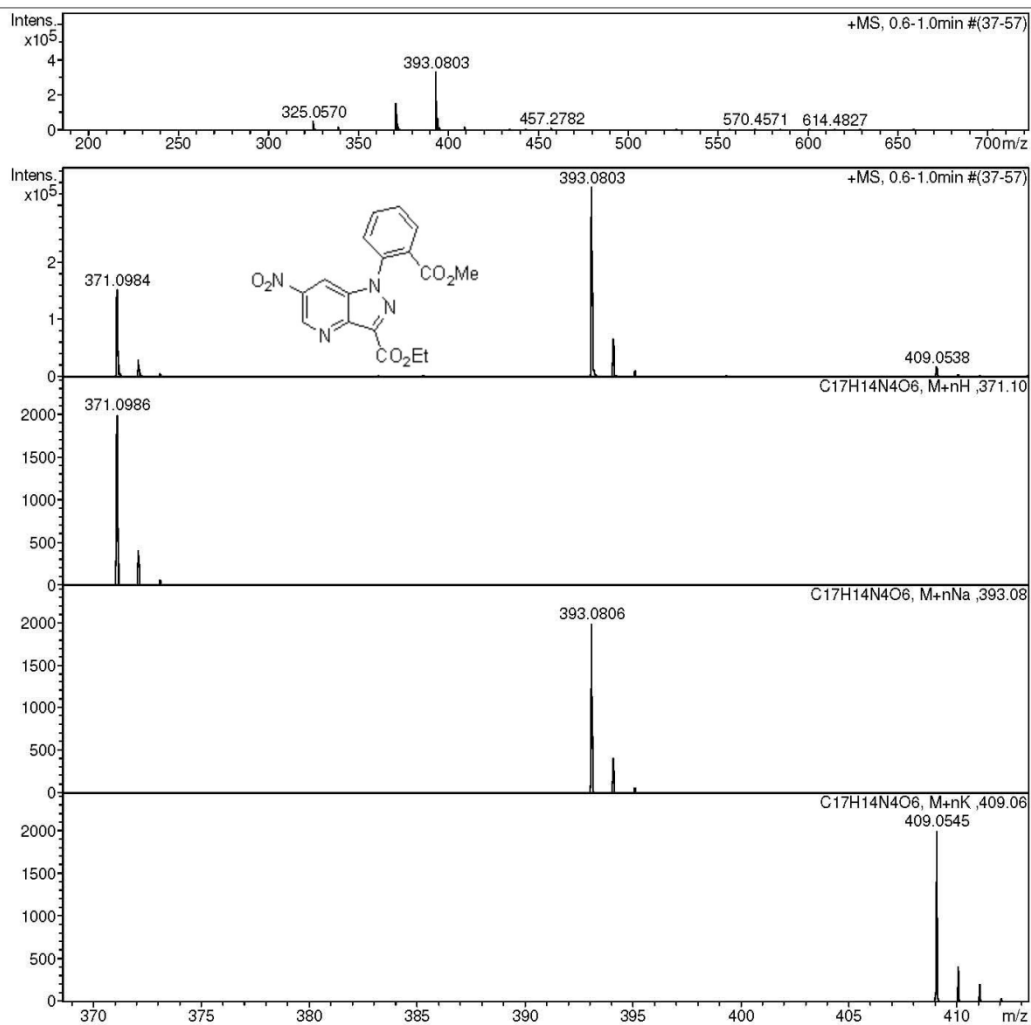

$^1\text{H}$  and  $^{13}\text{C}$  NMR spectra of compound **5d** in  $\text{CDCl}_3$

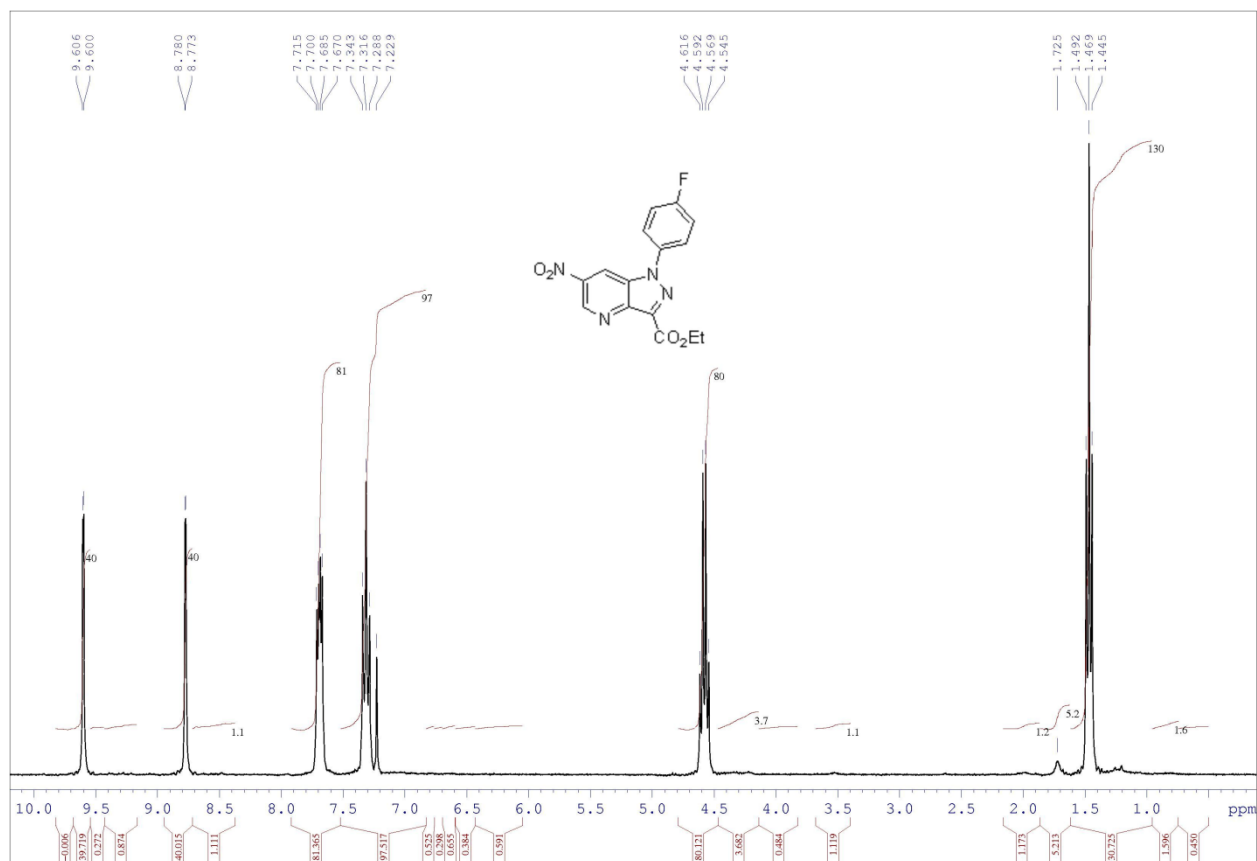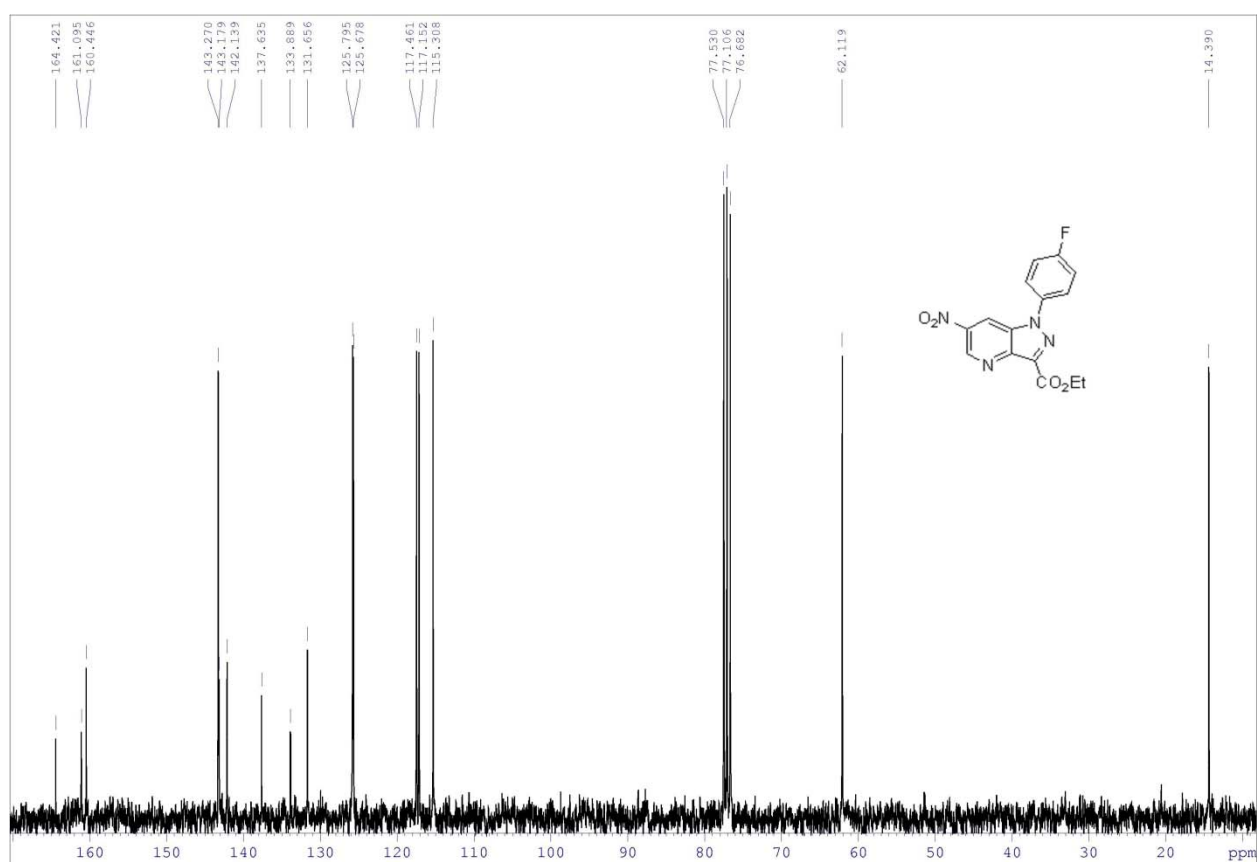

# HRMS spectrum of compound 5d

## Display Report

### Analysis Info

Analysis Name D:\Data\Kolotyrkina\2022\Bastrakov\1129003.d  
Method tune\_wide.m  
Sample Name /LPIK YM-8  
Comment C15H11FN4O4 mH 331.0837 calibrant added CH3CN

Acquisition Date 29.11.2022 10:21:44  
Operator BDAL@DE  
Instrument / Ser# micrOTOF 10248

### Acquisition Parameter

|             |            |                      |          |                  |           |
|-------------|------------|----------------------|----------|------------------|-----------|
| Source Type | ESI        | Ion Polarity         | Positive | Set Nebulizer    | 0.4 Bar   |
| Focus       | Not active |                      |          | Set Dry Heater   | 180 °C    |
| Scan Begin  | 50 m/z     | Set Capillary        | 4500 V   | Set Dry Gas      | 4.0 l/min |
| Scan End    | 3000 m/z   | Set End Plate Offset | -500 V   | Set Divert Valve | Waste     |

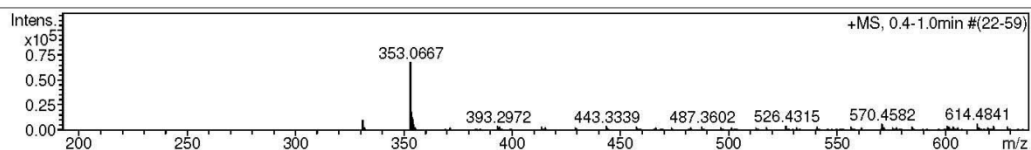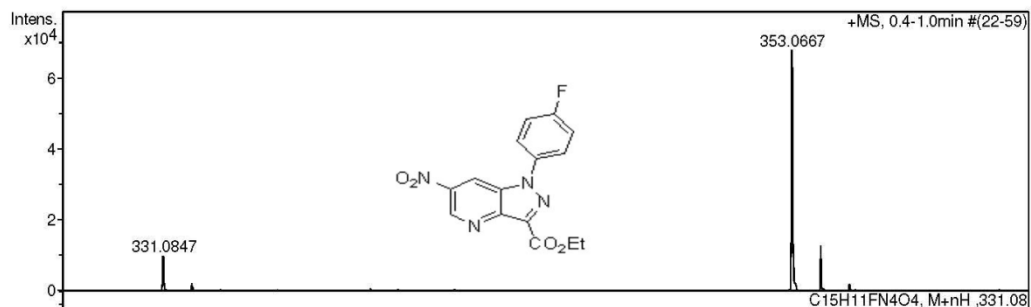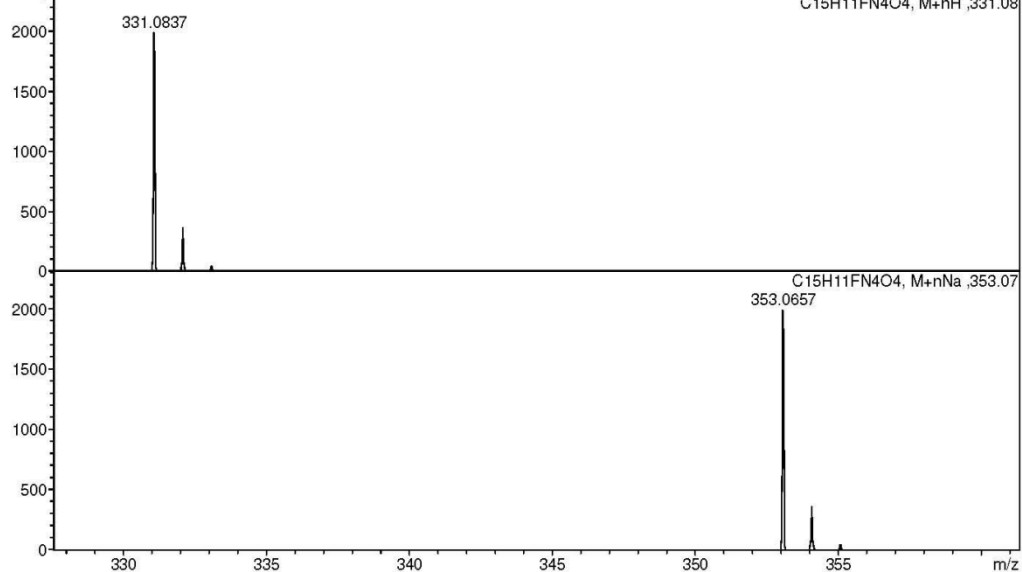

$^1\text{H}$  and  $^{13}\text{C}$  NMR spectra of compound **5e** in  $\text{CDCl}_3$

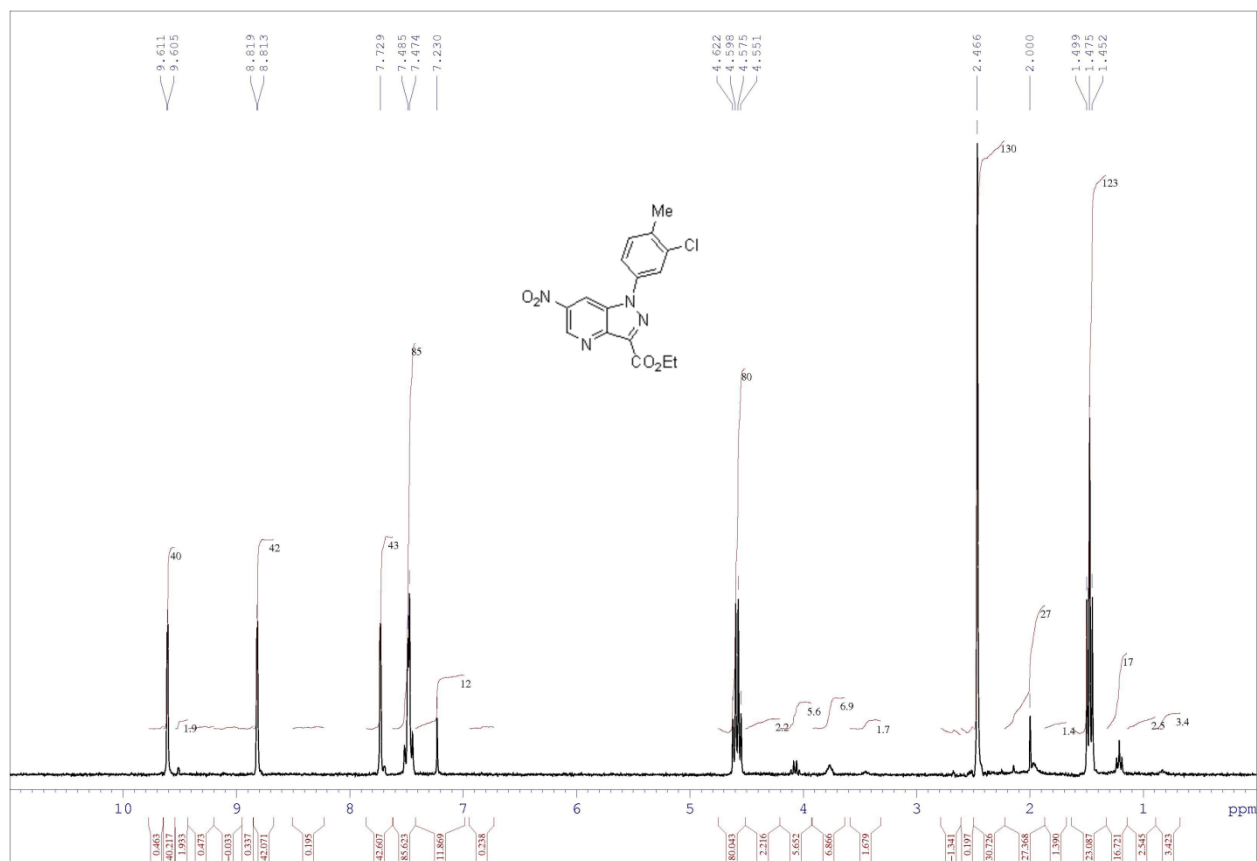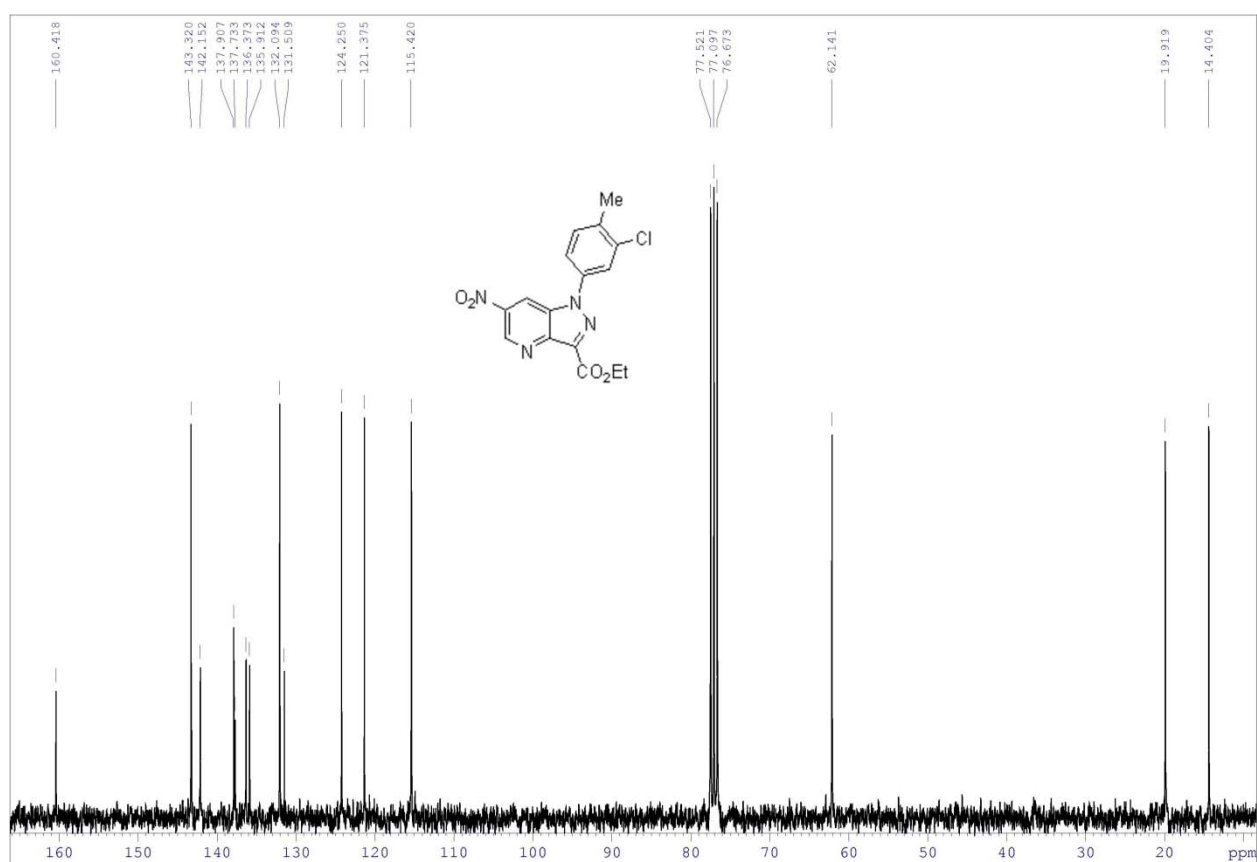



# HRMS spectrum of compound 5e

## Display Report

### Analysis Info

Analysis Name D:\Data\Kolotyrkina\2022\Bastrakov\0705020.d  
Method tune\_50-1600\_pos\_15\_12.m  
Sample Name /LPIK YM-9  
Comment C16H13ClN4O4 mH 361.0698 calibrant added CH3CN

Acquisition Date 05.07.2022 15:06:12

Operator BDAL@DE  
Instrument / Ser# micrOTOF 10248

### Acquisition Parameter

|             |            |                      |          |                  |           |
|-------------|------------|----------------------|----------|------------------|-----------|
| Source Type | ESI        | Ion Polarity         | Positive | Set Nebulizer    | 0.4 Bar   |
| Focus       | Not active |                      |          | Set Dry Heater   | 180 °C    |
| Scan Begin  | 50 m/z     | Set Capillary        | 4500 V   | Set Dry Gas      | 4.0 l/min |
| Scan End    | 1600 m/z   | Set End Plate Offset | -500 V   | Set Divert Valve | Waste     |

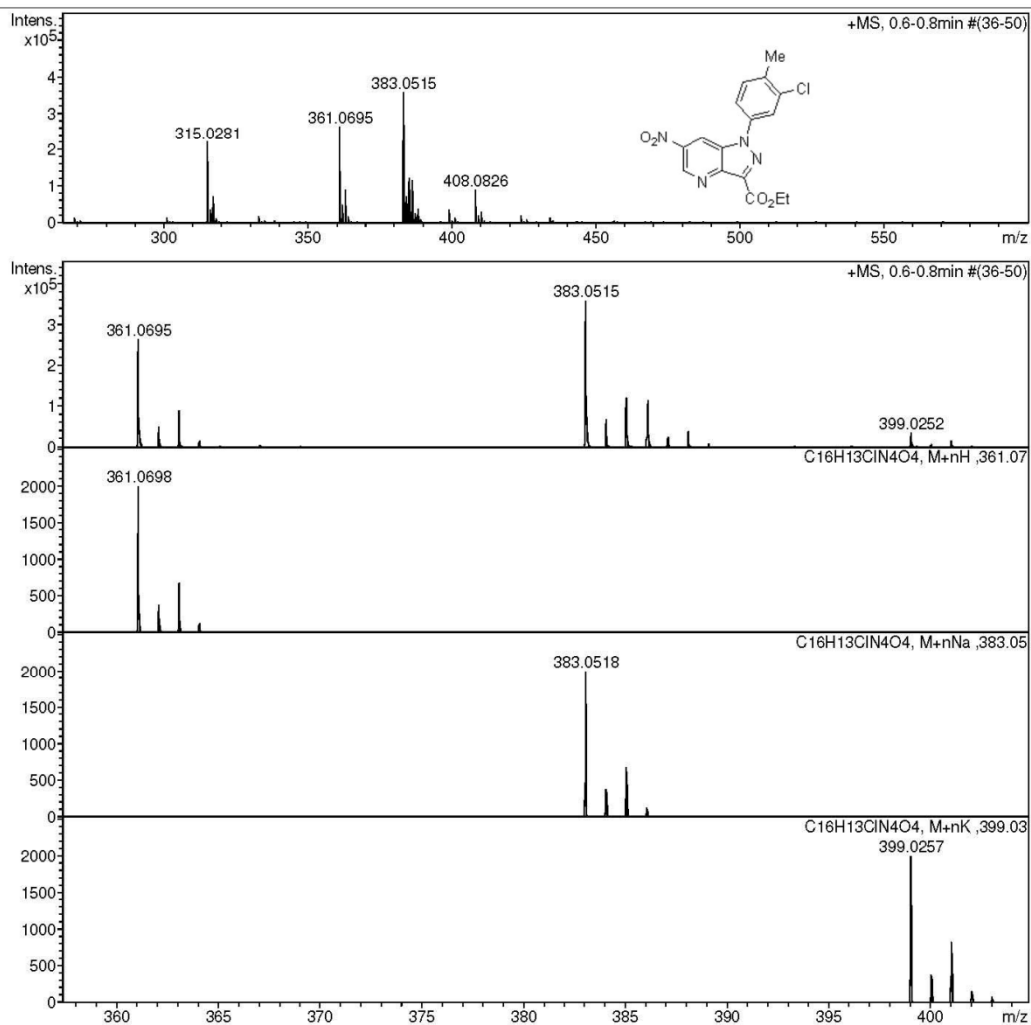

<sup>1</sup>H and <sup>13</sup>C NMR spectra of compound **5f** in CDCl<sub>3</sub>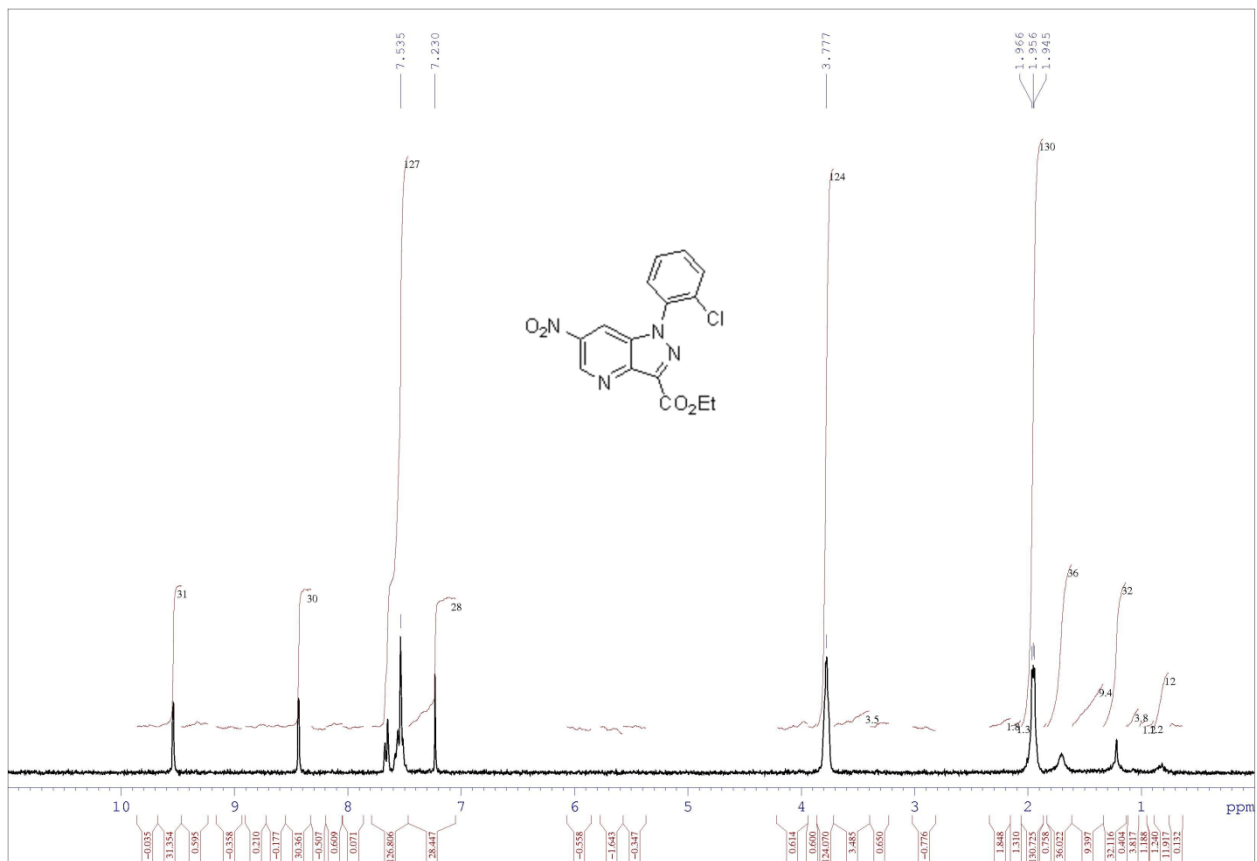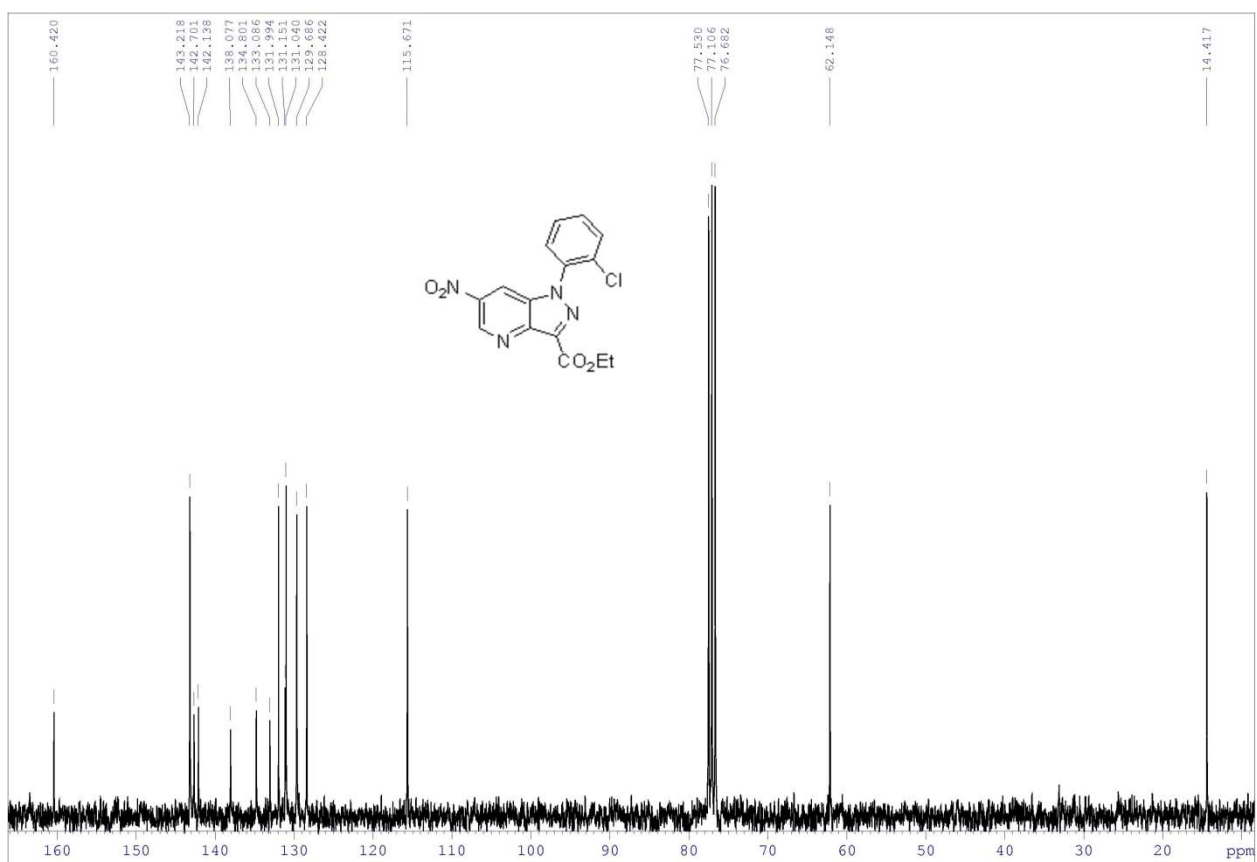

# HRMS spectrum of compound 5f

## Display Report

### Analysis Info

Analysis Name D:\Data\Kolotyrykina\2022\Bastrakov\0705021.d  
Method tune\_50-1600\_pos\_15\_12.m  
Sample Name /LPIK YM-11.1  
Comment C15H11ClN4O4 mH 347.0541 calibrant added CH3CN

Acquisition Date 05.07.2022 15:11:29

Operator BDAL@DE  
Instrument / Ser# micrOTOF 10248

### Acquisition Parameter

|             |            |                      |          |                  |           |
|-------------|------------|----------------------|----------|------------------|-----------|
| Source Type | ESI        | Ion Polarity         | Positive | Set Nebulizer    | 0.4 Bar   |
| Focus       | Not active |                      |          | Set Dry Heater   | 180 °C    |
| Scan Begin  | 50 m/z     | Set Capillary        | 4500 V   | Set Dry Gas      | 4.0 l/min |
| Scan End    | 1600 m/z   | Set End Plate Offset | -500 V   | Set Divert Valve | Waste     |

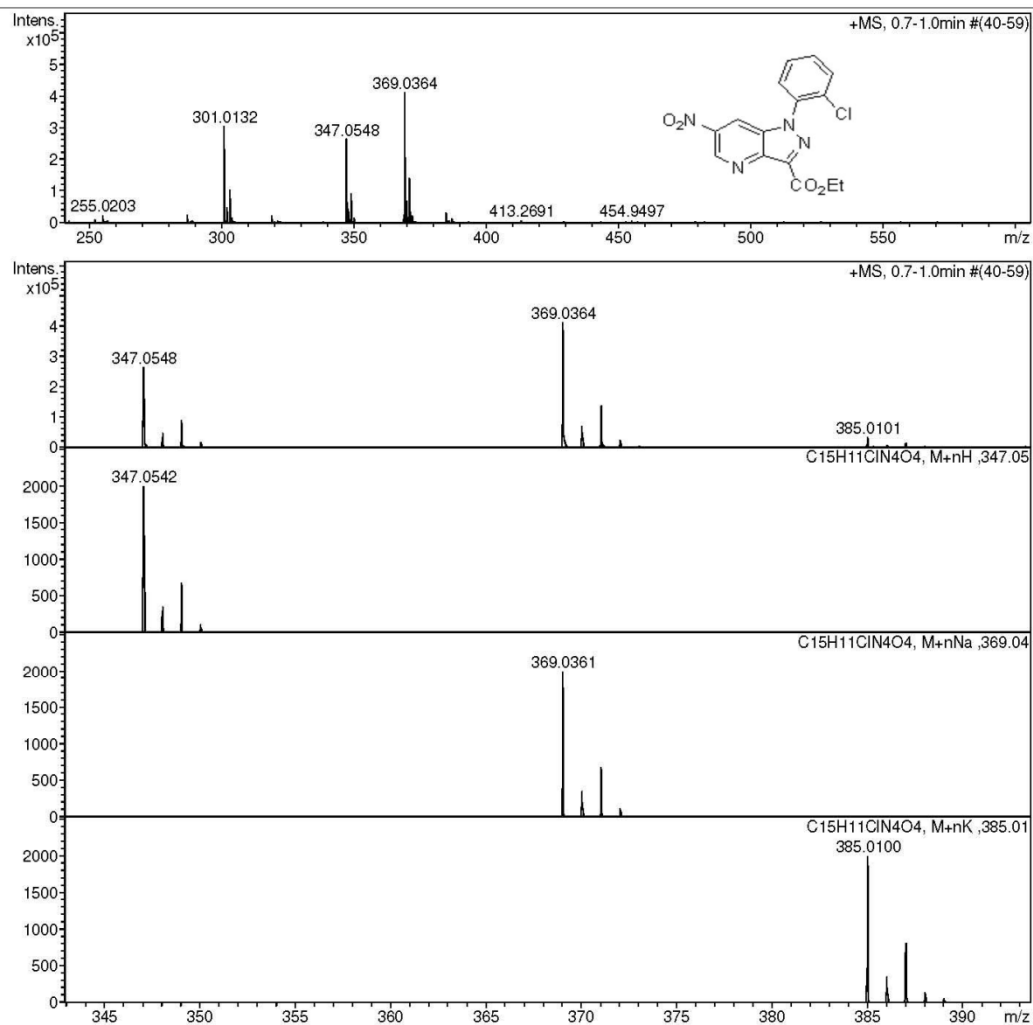

$^1\text{H}$  and  $^{13}\text{C}$  NMR spectra of compound **5g** in  $\text{CDCl}_3$

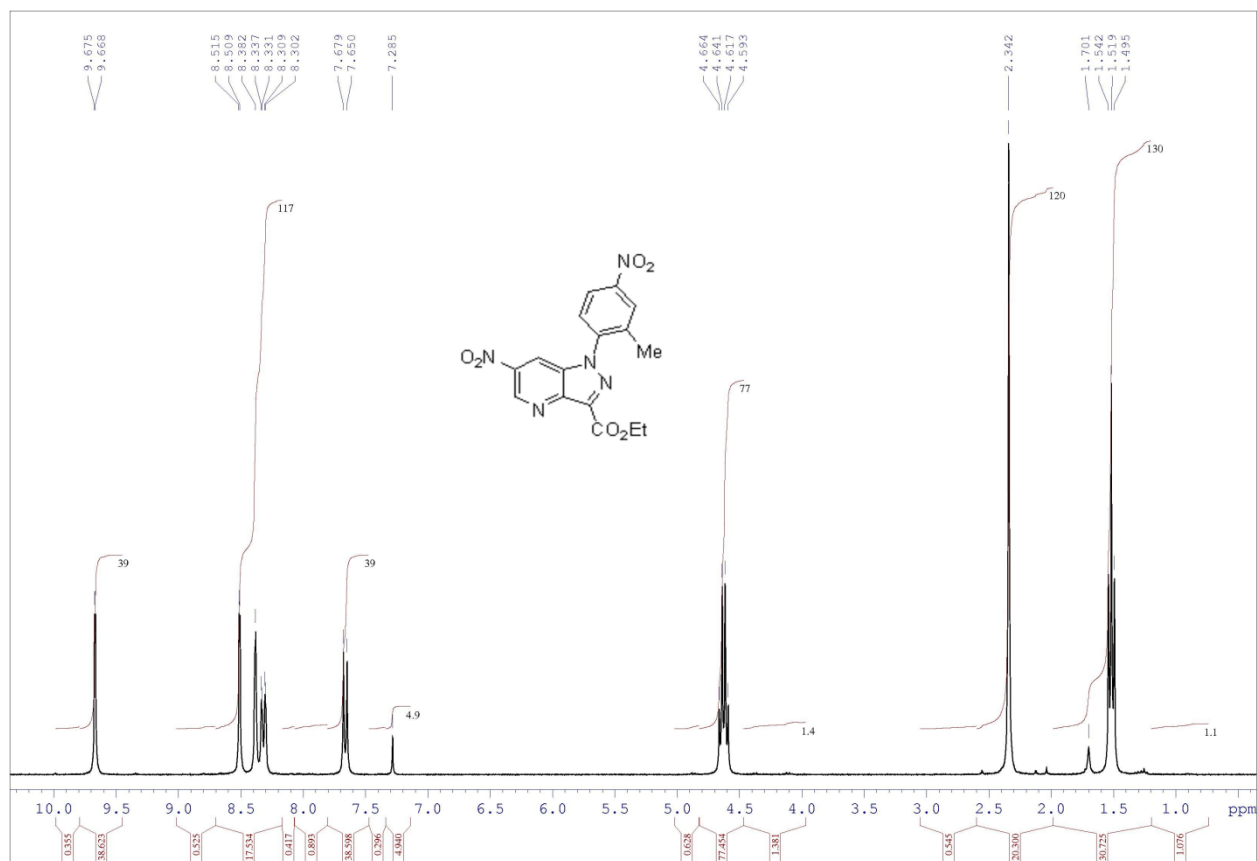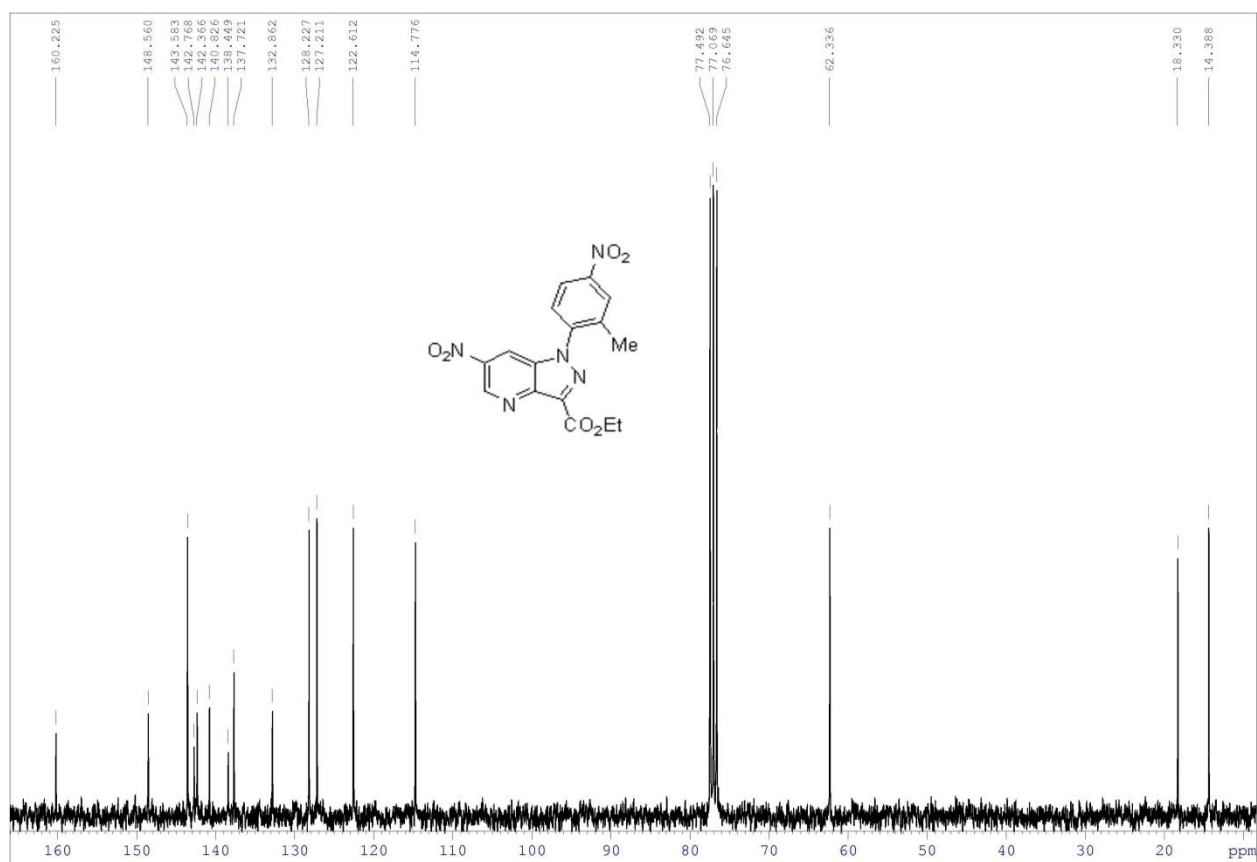

# HRMS spectrum of compound 5g

## Display Report

### Analysis Info

Analysis Name D:\Data\Kolotyrkina\2022\Bastrakov\1221007.d  
Method tune\_low.m  
Sample Name /LPIK VN-606  
Comment C16H13N5O6 mH 372.0938 calibrant added CH3CN

Acquisition Date 21.12.2022 10:09:22

Operator BDAL@DE  
Instrument / Ser# micrOTOF 10248

### Acquisition Parameter

|             |            |                      |          |                  |           |
|-------------|------------|----------------------|----------|------------------|-----------|
| Source Type | ESI        | Ion Polarity         | Positive | Set Nebulizer    | 0.4 Bar   |
| Focus       | Not active |                      |          | Set Dry Heater   | 180 °C    |
| Scan Begin  | 50 m/z     | Set Capillary        | 4500 V   | Set Dry Gas      | 4.0 l/min |
| Scan End    | 2500 m/z   | Set End Plate Offset | -500 V   | Set Divert Valve | Waste     |

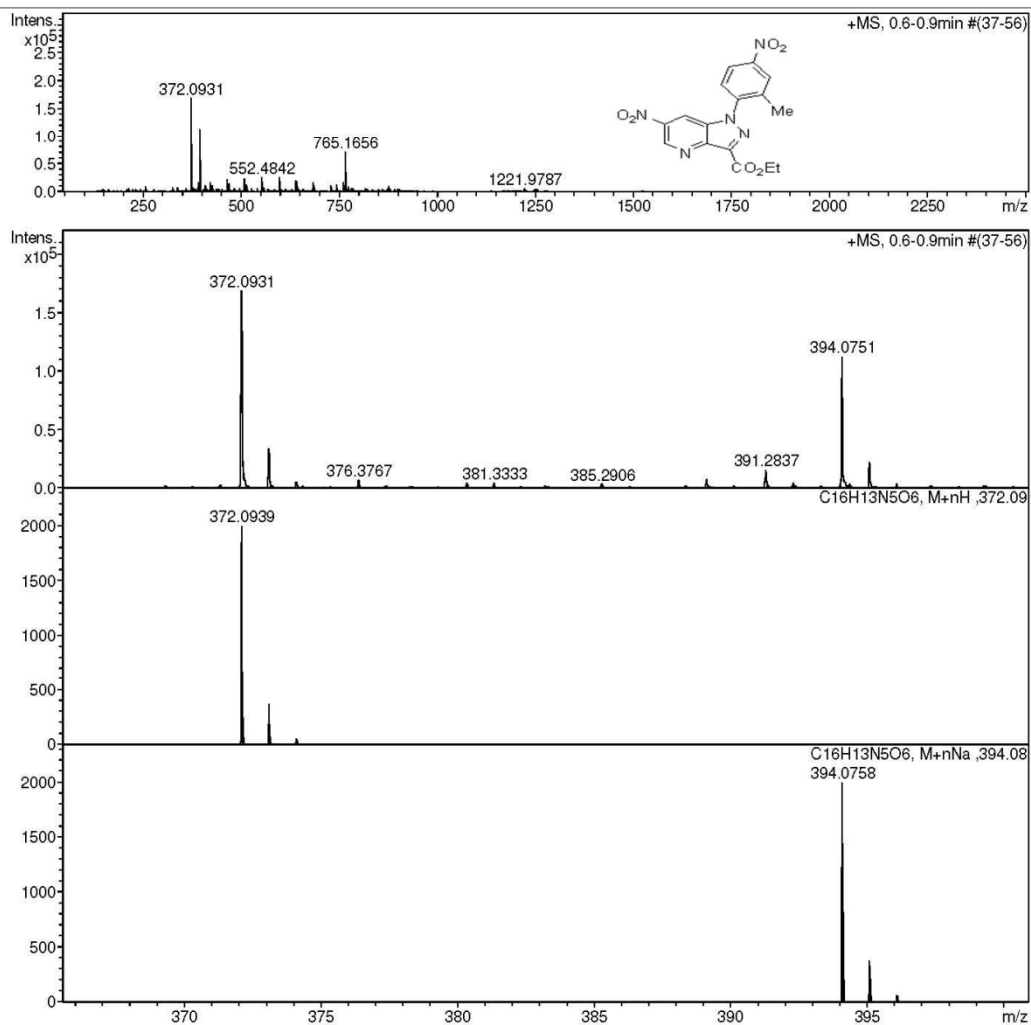

$^1\text{H}$  and  $^{13}\text{C}$  NMR spectra of compound **5h** in  $\text{CDCl}_3$

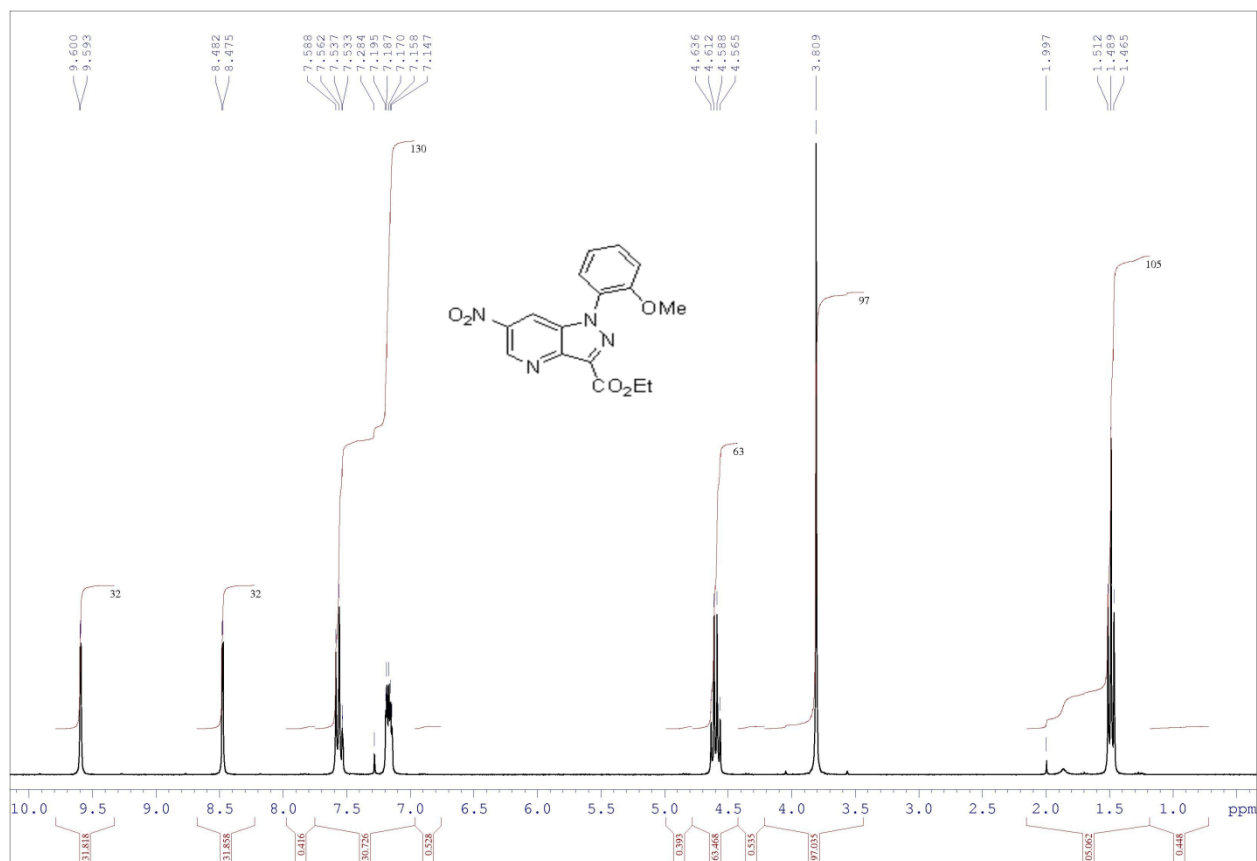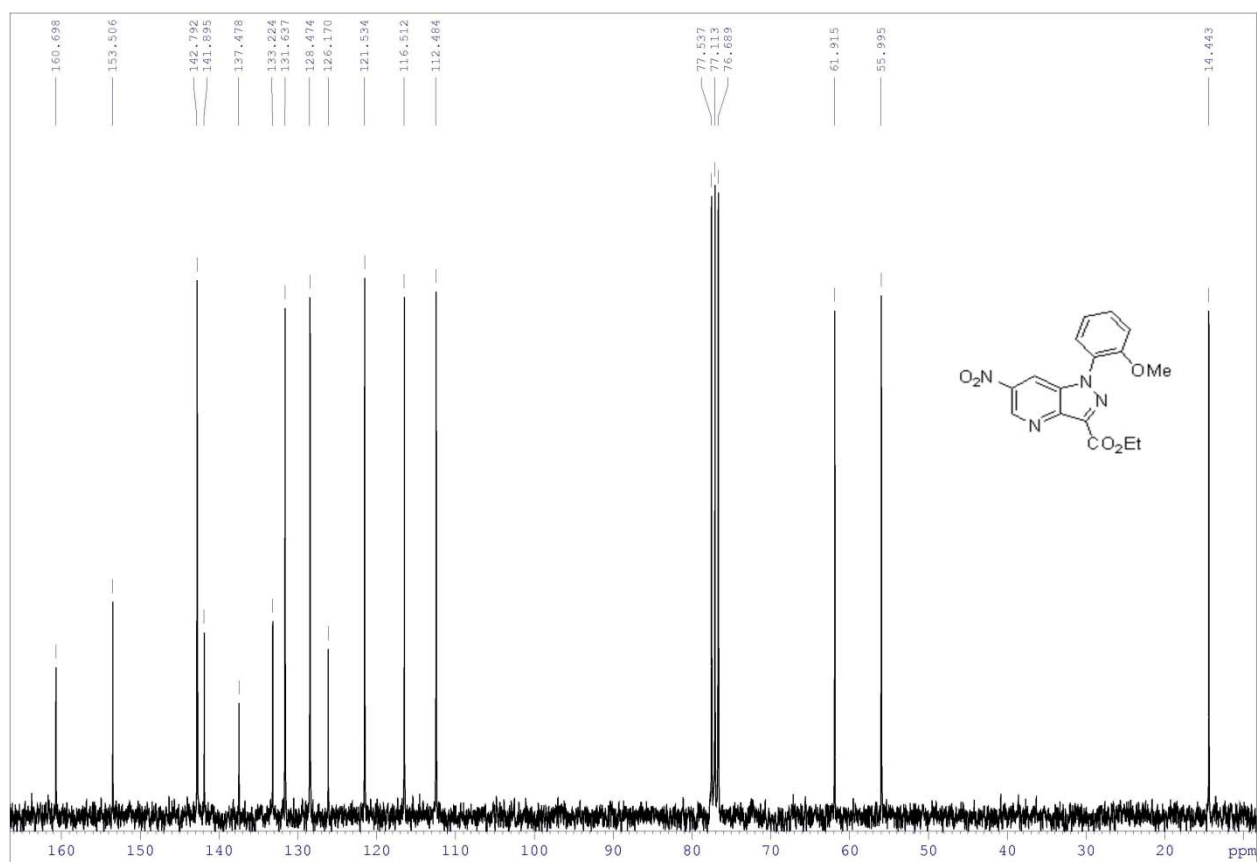

# HRMS spectrum of compound 5h

## Display Report

### Analysis Info

Analysis Name D:\Data\Kolotyrkina\2022\Bastrakov\1221008.d  
Method tune\_low.m  
Sample Name /LPIK VN-611  
Comment C16H14N4O5 mH 343.1036 calibrant added CH3CN

Acquisition Date 21.12.2022 10:15:07

Operator BDAL@DE  
Instrument / Ser# micrOTOF 10248

### Acquisition Parameter

|             |            |                      |          |                  |           |
|-------------|------------|----------------------|----------|------------------|-----------|
| Source Type | ESI        | Ion Polarity         | Positive | Set Nebulizer    | 0.4 Bar   |
| Focus       | Not active |                      |          | Set Dry Heater   | 180 °C    |
| Scan Begin  | 50 m/z     | Set Capillary        | 4500 V   | Set Dry Gas      | 4.0 l/min |
| Scan End    | 2500 m/z   | Set End Plate Offset | -500 V   | Set Divert Valve | Waste     |

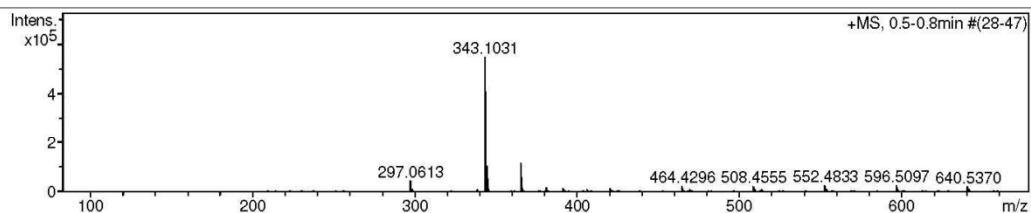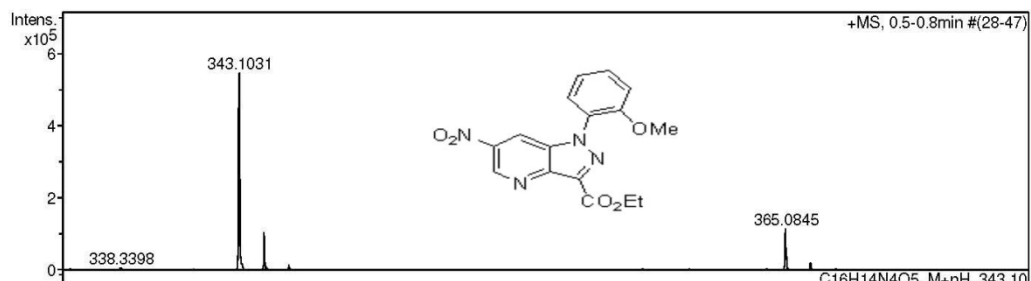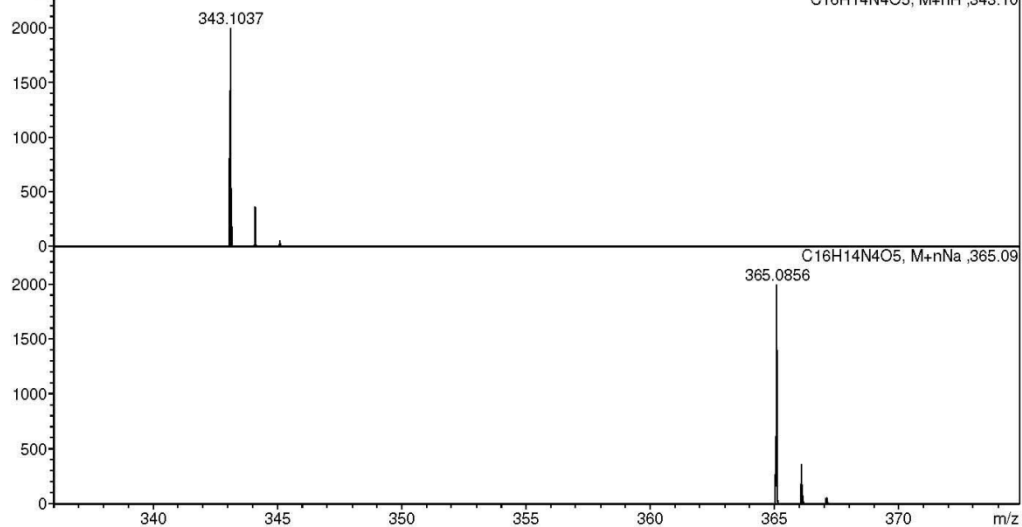

$^1\text{H}$  and  $^{13}\text{C}$  NMR spectra of compound **5i** in  $\text{CDCl}_3$

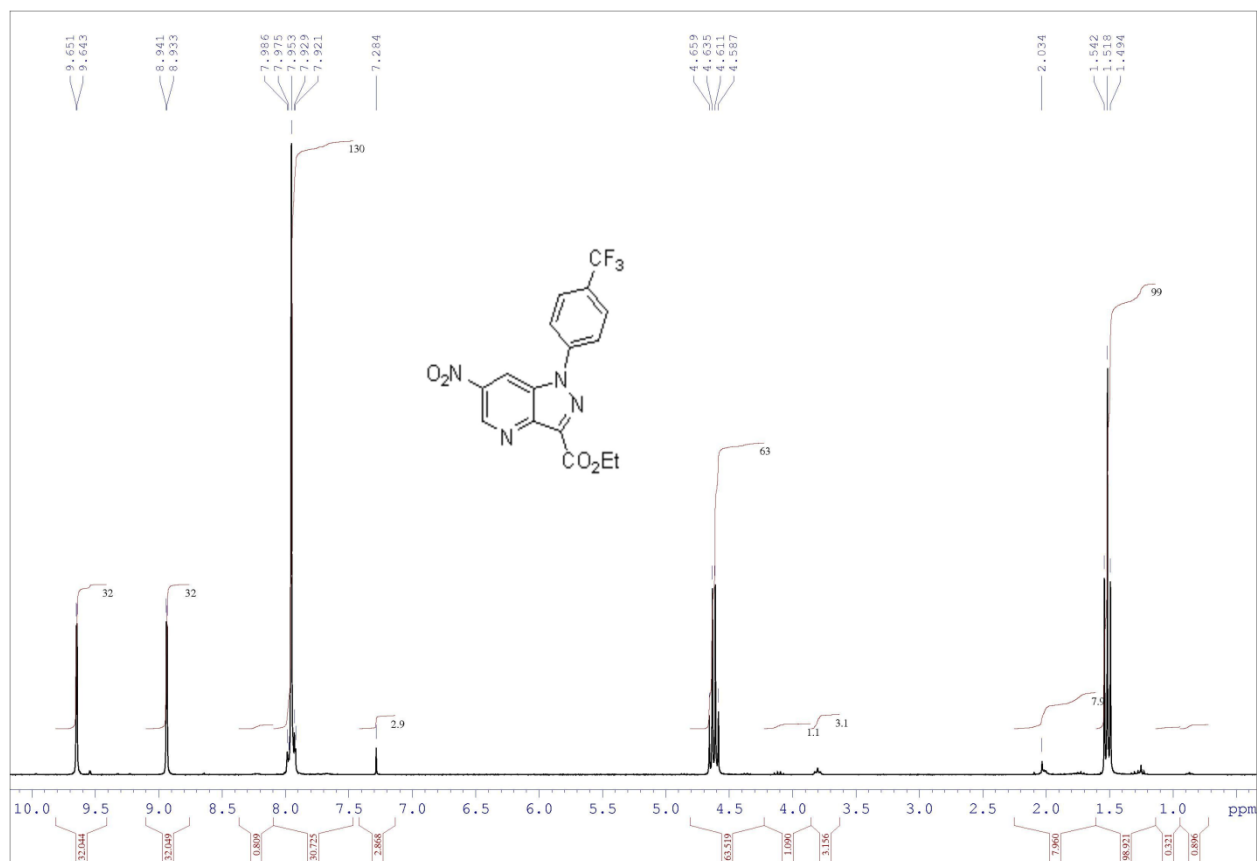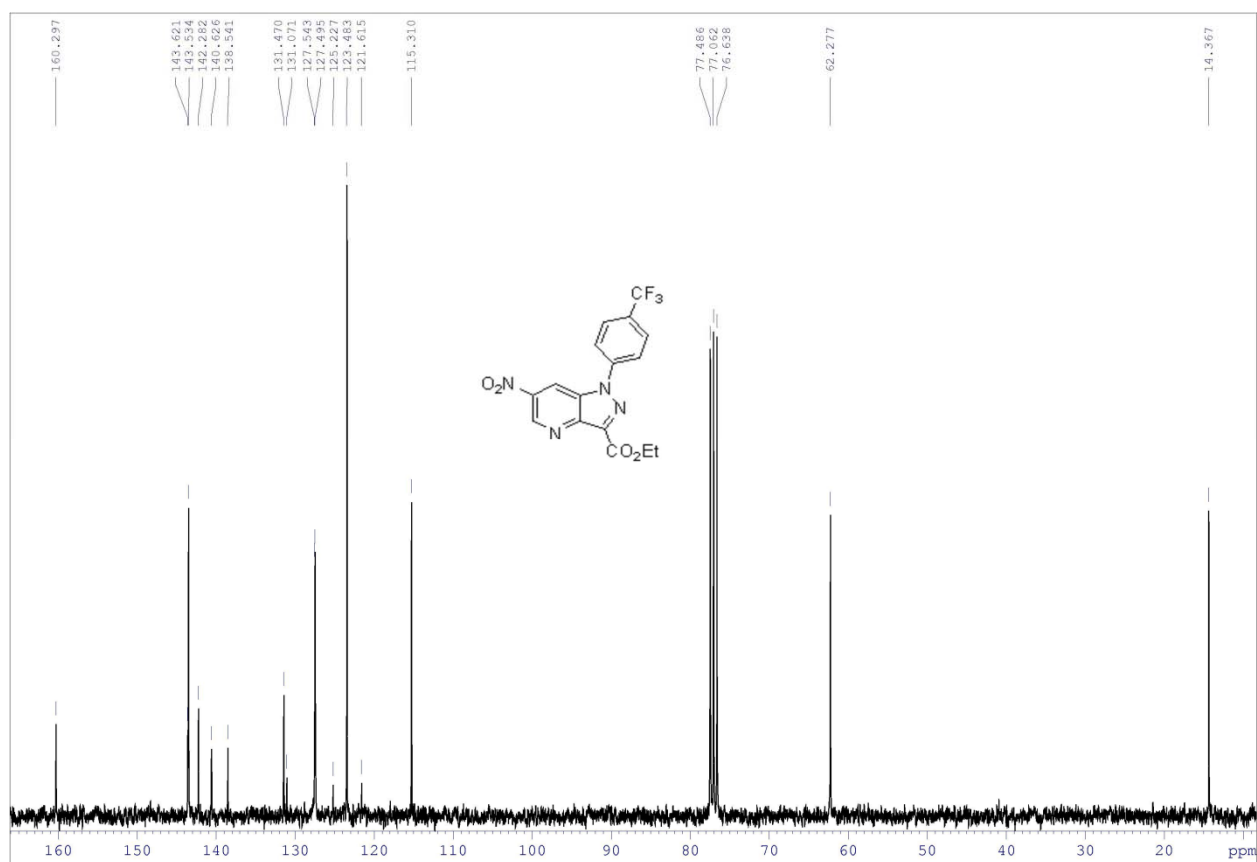



# HRMS spectrum of compound 5i

## Display Report

### Analysis Info

Analysis Name D:\Data\Kolotyrkina\2022\Bastrakov\1221009.d  
Method tune\_low.m  
Sample Name /LPIK VN-624  
Comment C16H11F3N4O4 mH 381.0805 calibrant added CH3CN

Acquisition Date 21.12.2022 10:19:11

Operator BDAL@DE  
Instrument / Ser# micrOTOF 10248

### Acquisition Parameter

|             |            |                      |          |                  |           |
|-------------|------------|----------------------|----------|------------------|-----------|
| Source Type | ESI        | Ion Polarity         | Positive | Set Nebulizer    | 0.4 Bar   |
| Focus       | Not active |                      |          | Set Dry Heater   | 180 °C    |
| Scan Begin  | 50 m/z     | Set Capillary        | 4500 V   | Set Dry Gas      | 4.0 l/min |
| Scan End    | 2500 m/z   | Set End Plate Offset | -500 V   | Set Divert Valve | Waste     |

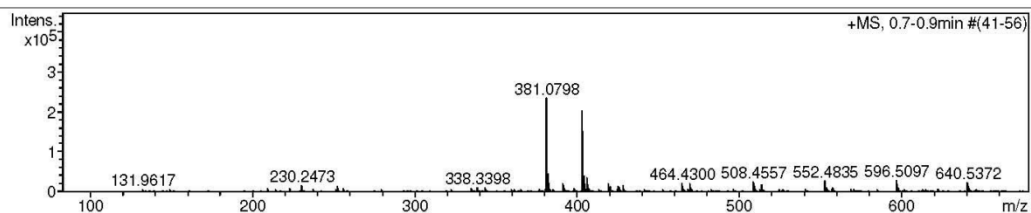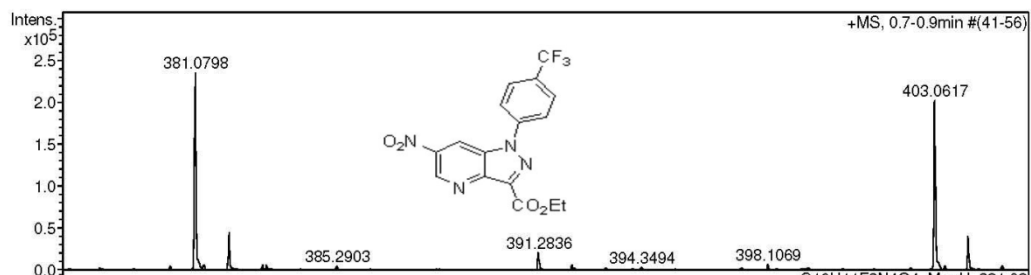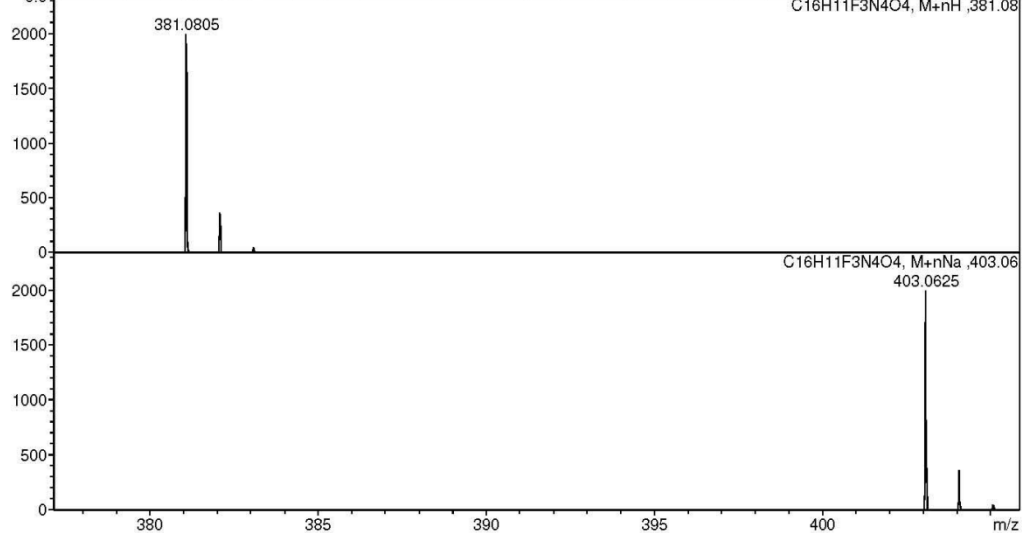

$^1\text{H}$  and  $^{13}\text{C}$  NMR spectra of compound **5j** in  $\text{CDCl}_3$

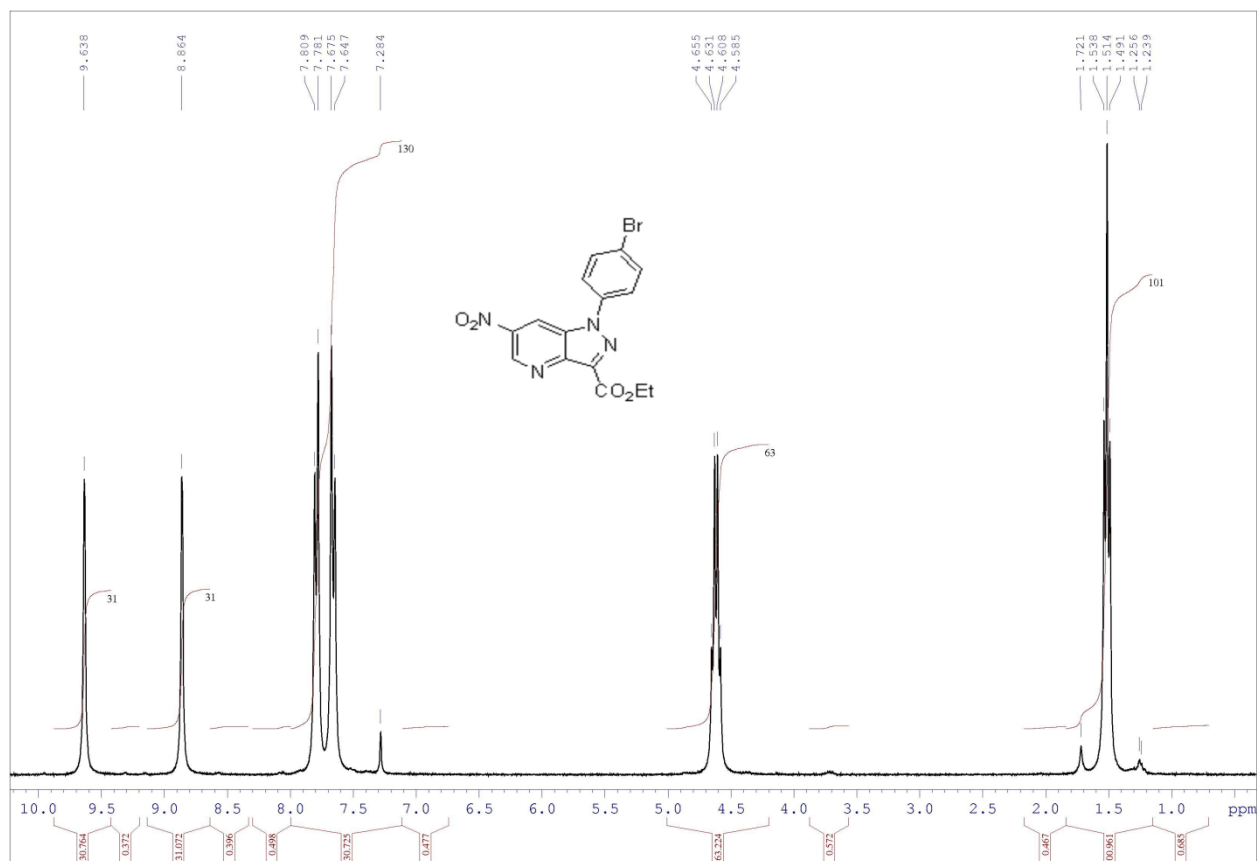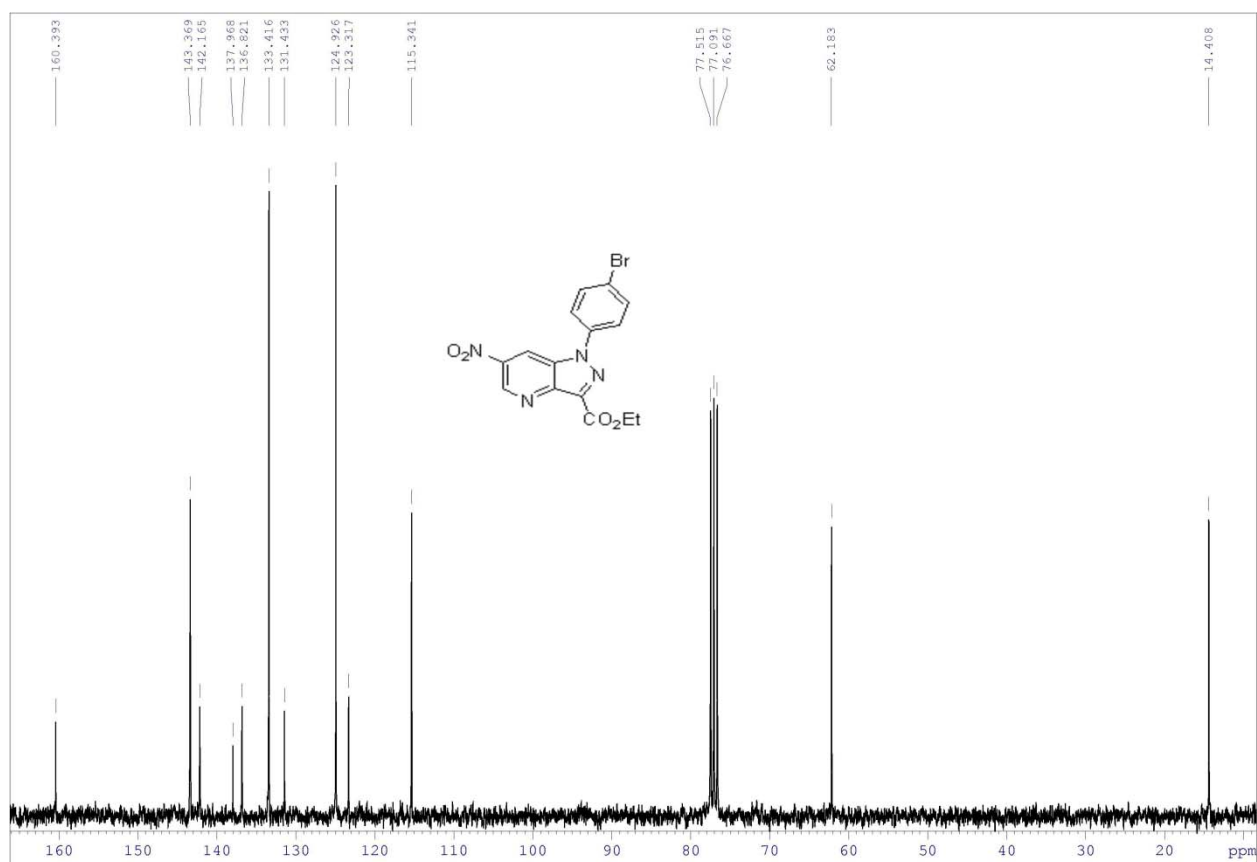

# HRMS spectrum of compound 5j

## Display Report

|               |                                                |                   |                     |  |
|---------------|------------------------------------------------|-------------------|---------------------|--|
| Analysis Info |                                                | Acquisition Date  | 21.12.2022 10:23:52 |  |
| Analysis Name | D:\Data\Kolotyrkina\2022\Bastrakov\1221010.d   | Operator          | BDAL@DE             |  |
| Method        | tune_low.m                                     | Instrument / Ser# | micrOTOF 10248      |  |
| Sample Name   | /LPIK VN-643                                   |                   |                     |  |
| Comment       | C15H11BrN4O4 mH 391.0036 calibrant added CH3CN |                   |                     |  |

|                              |            |                      |          |                  |           |
|------------------------------|------------|----------------------|----------|------------------|-----------|
| <b>Acquisition Parameter</b> |            | Ion Polarity         | Positive | Set Nebulizer    | 0.4 Bar   |
| Source Type                  | ESI        |                      |          | Set Dry Heater   | 180 °C    |
| Focus                        | Not active | Set Capillary        | 4500 V   | Set Dry Gas      | 4.0 l/min |
| Scan Begin                   | 50 m/z     | Set End Plate Offset | -500 V   | Set Divert Valve | Waste     |
| Scan End                     | 2500 m/z   |                      |          |                  |           |

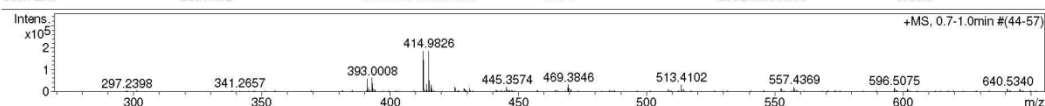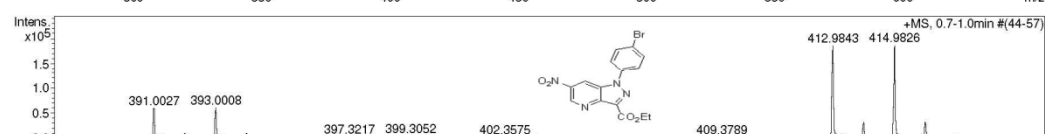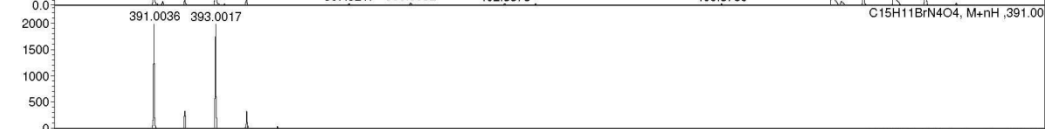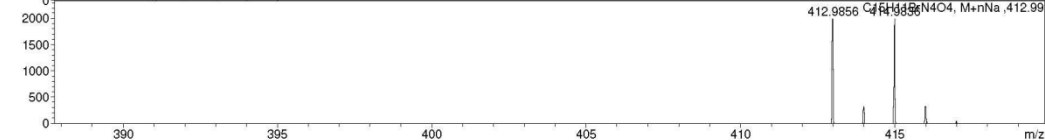

$^1\text{H}$  and  $^{13}\text{C}$  NMR spectra of compound **5k** in  $\text{CDCl}_3$

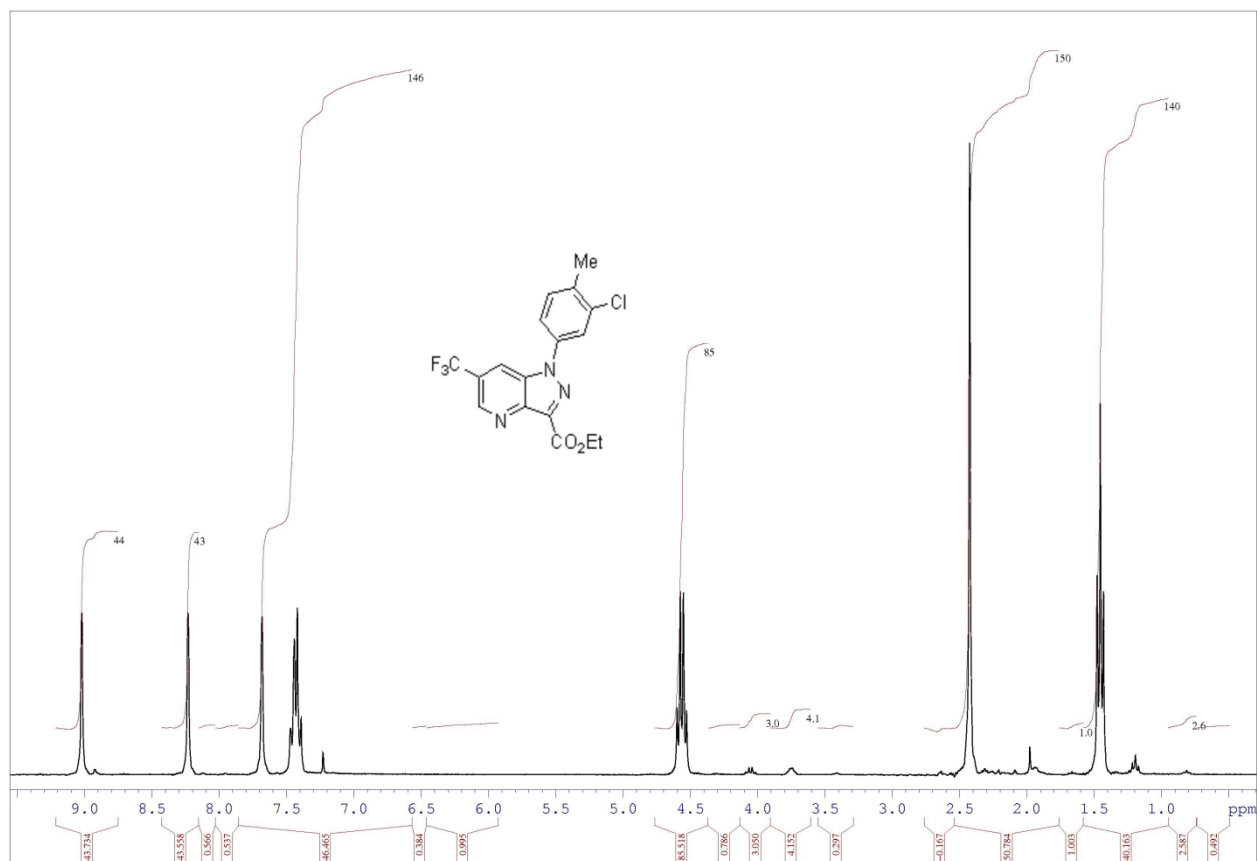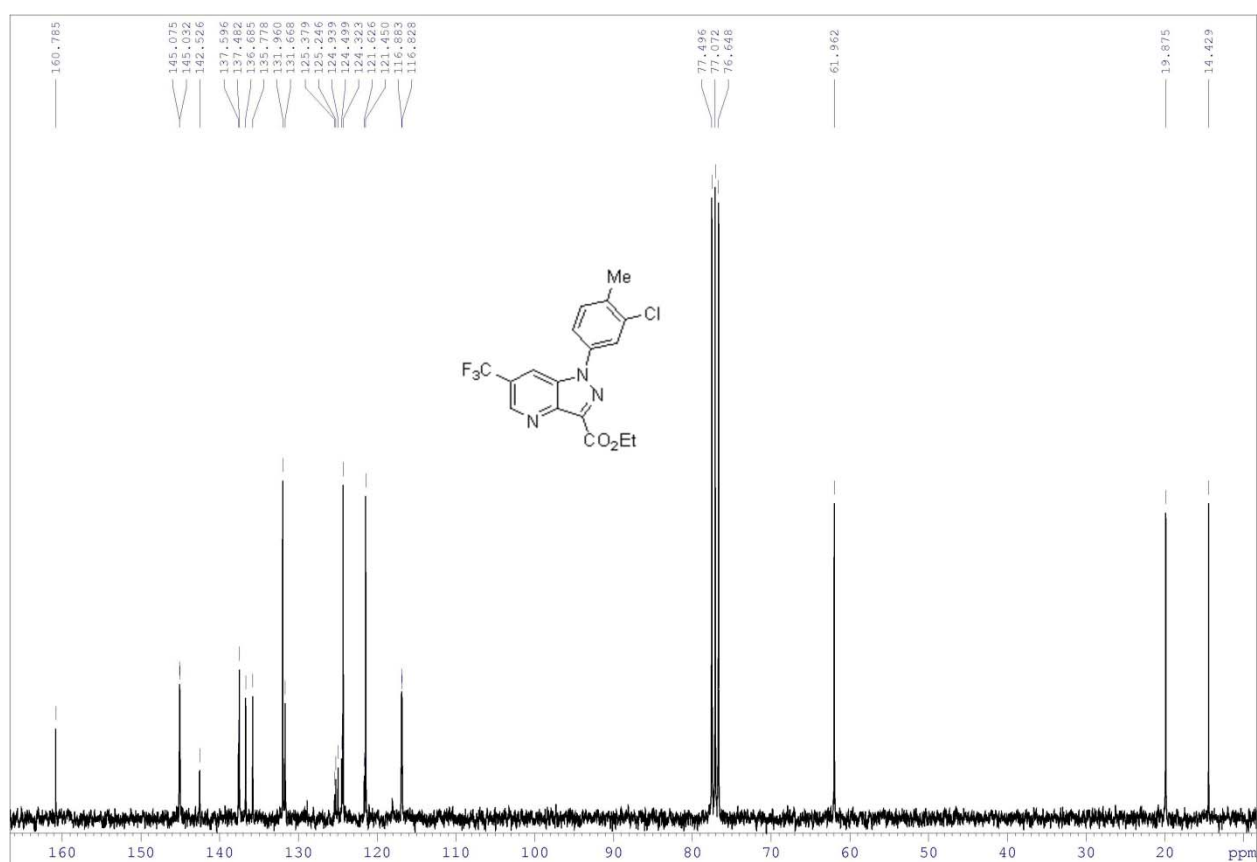

# HRMS spectrum of compound 5k

## Display Report

### Analysis Info

Analysis Name D:\Data\Kolotyrkina\2022\Bastrakov\1221014.d  
 Method tune\_low.m  
 Sample Name /LPIK VN-588  
 Comment C<sub>17</sub>H<sub>13</sub>ClF<sub>3</sub>N<sub>3</sub>O<sub>2</sub> mH 384.0721 calibrant added CH<sub>3</sub>CN

Acquisition Date 21.12.2022 10:53:19

Operator BDAL@DE  
 Instrument / Ser# micrOTOF 10248

### Acquisition Parameter

|             |            |                      |          |                  |           |
|-------------|------------|----------------------|----------|------------------|-----------|
| Source Type | ESI        | Ion Polarity         | Positive | Set Nebulizer    | 0.4 Bar   |
| Focus       | Not active |                      |          | Set Dry Heater   | 180 °C    |
| Scan Begin  | 50 m/z     | Set Capillary        | 4500 V   | Set Dry Gas      | 4.0 l/min |
| Scan End    | 2500 m/z   | Set End Plate Offset | -500 V   | Set Divert Valve | Waste     |

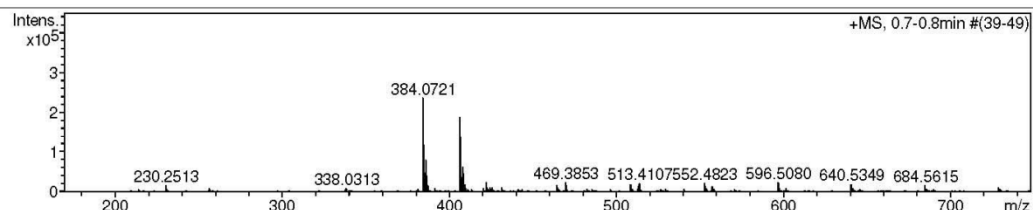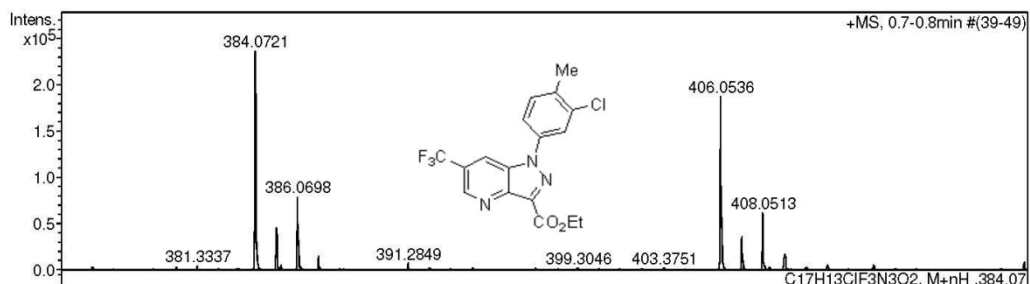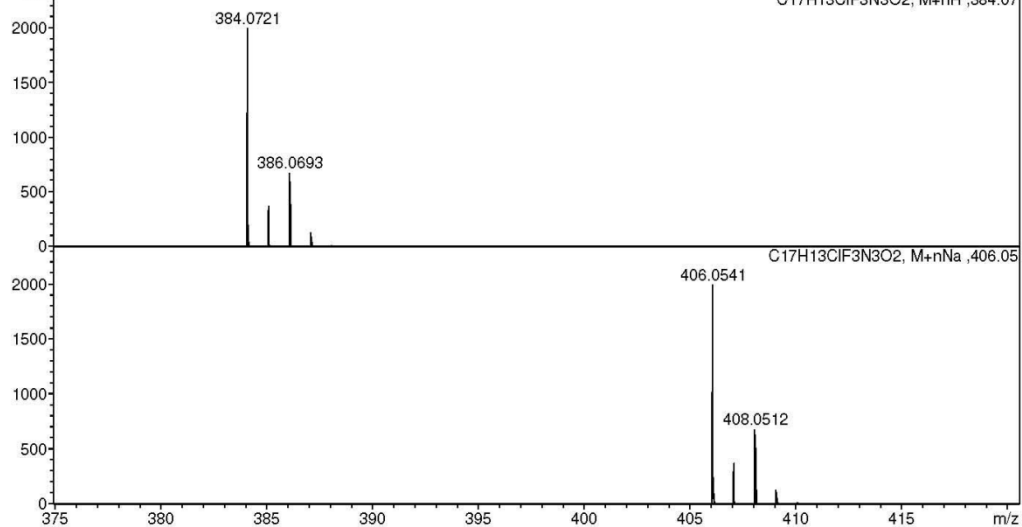

$^1\text{H}$  and  $^{13}\text{C}$  NMR spectra of compound **5I** in  $\text{CDCl}_3$

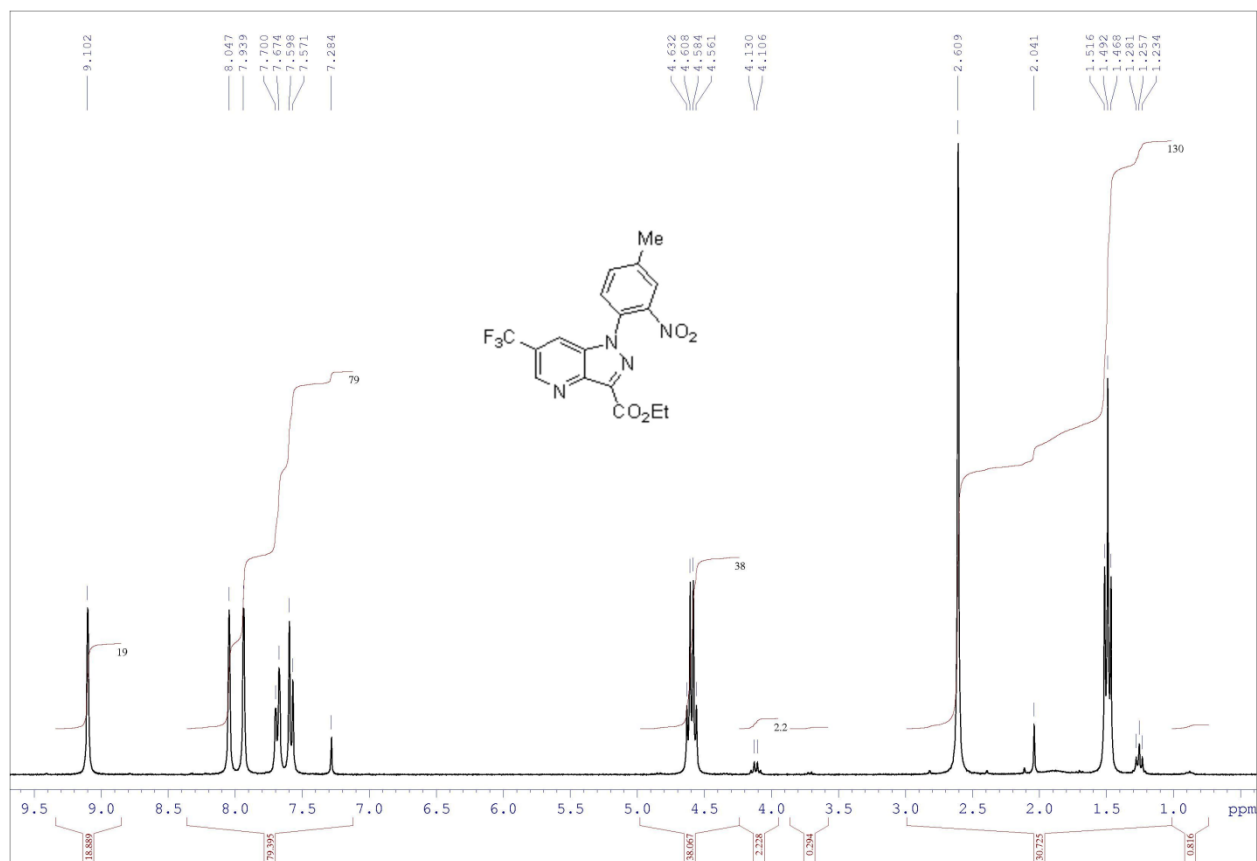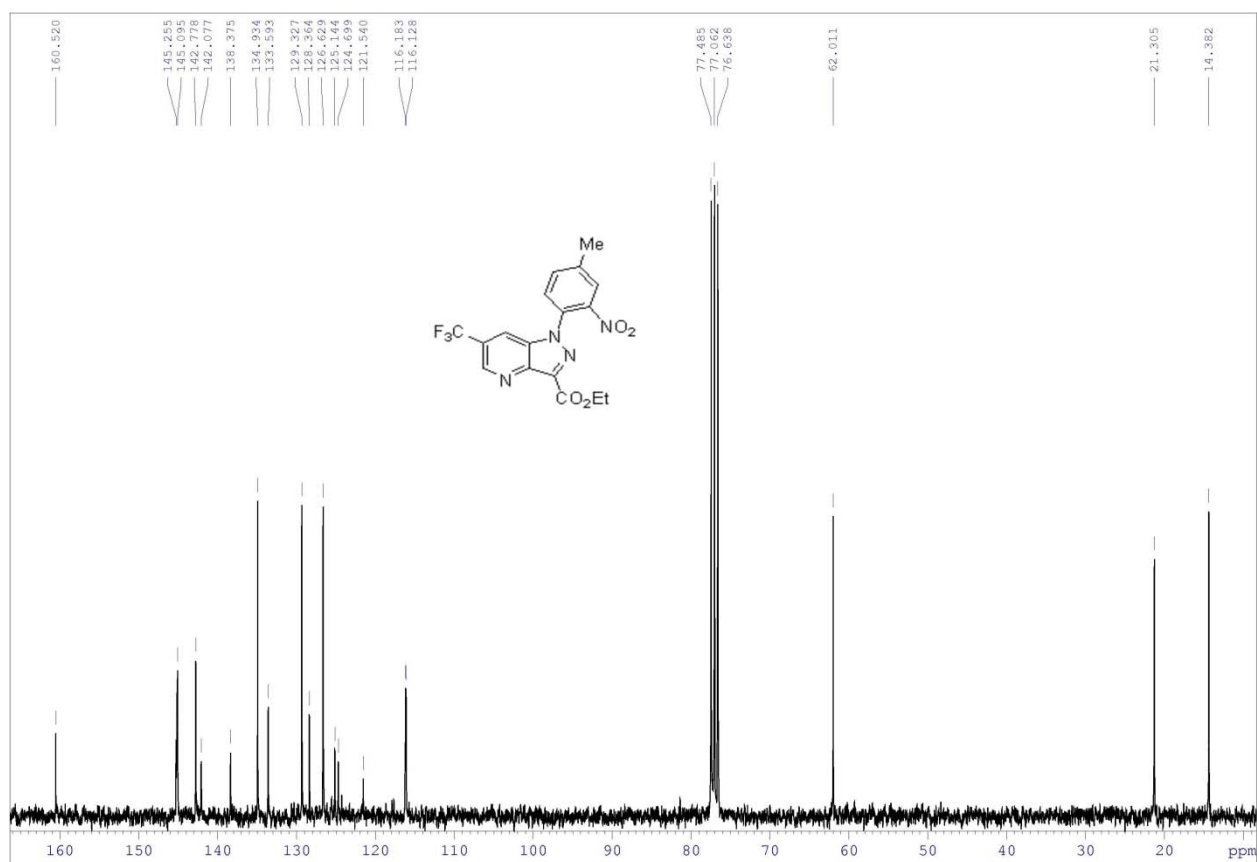

# HRMS spectrum of compound 5l

## Display Report

### Analysis Info

Analysis Name D:\Data\Kolotyrkina\2022\Bastrakov\1221015.d  
Method tune\_low.m  
Sample Name /LPIK VN-589  
Comment C17H13F3N4O4 mH 395.0961 calibrant added CH3CN

Acquisition Date 21.12.2022 11:04:41

Operator BDAL@DE  
Instrument / Ser# micrOTOF 10248

### Acquisition Parameter

|             |            |                      |          |                  |           |
|-------------|------------|----------------------|----------|------------------|-----------|
| Source Type | ESI        | Ion Polarity         | Positive | Set Nebulizer    | 0.4 Bar   |
| Focus       | Not active |                      |          | Set Dry Heater   | 180 °C    |
| Scan Begin  | 50 m/z     | Set Capillary        | 4500 V   | Set Dry Gas      | 4.0 l/min |
| Scan End    | 2500 m/z   | Set End Plate Offset | -500 V   | Set Divert Valve | Waste     |

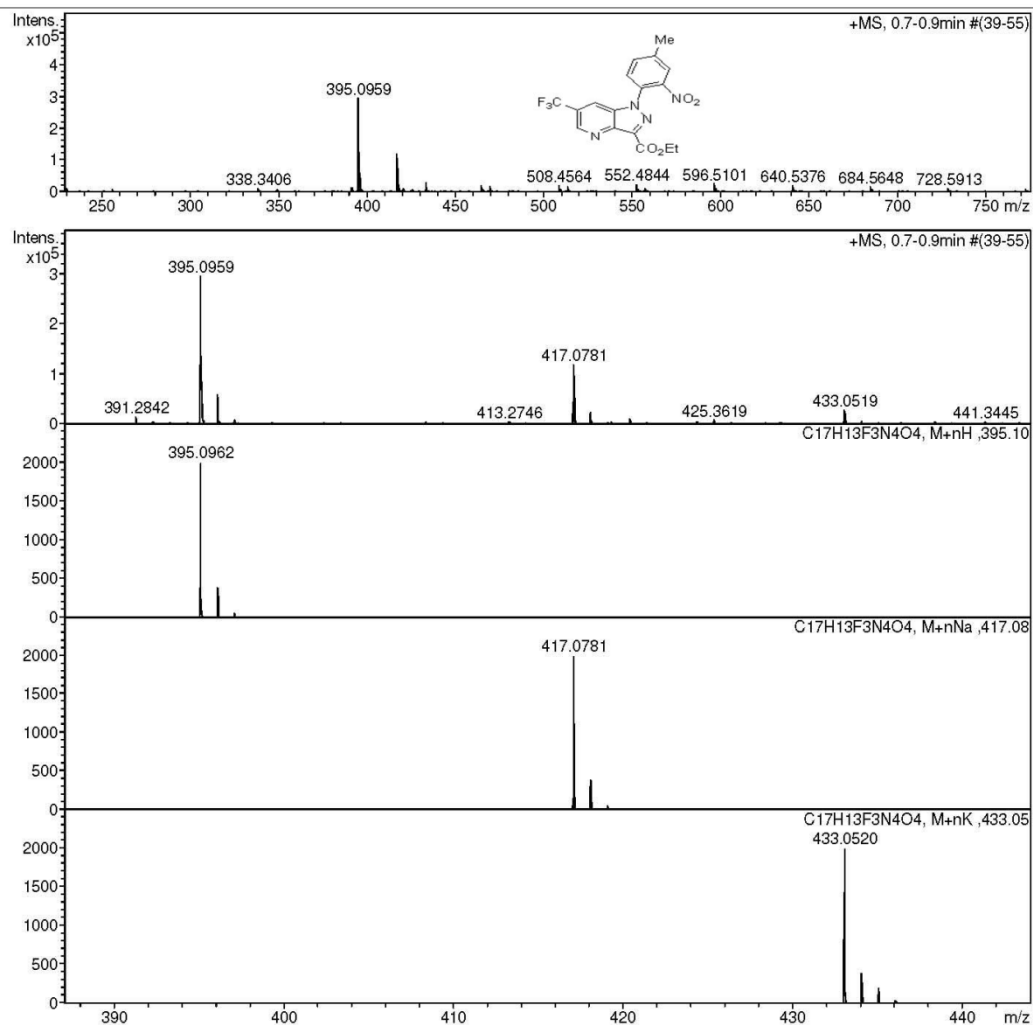

$^1\text{H}$  and  $^{13}\text{C}$  NMR spectra of compound **5m** in  $\text{CDCl}_3$

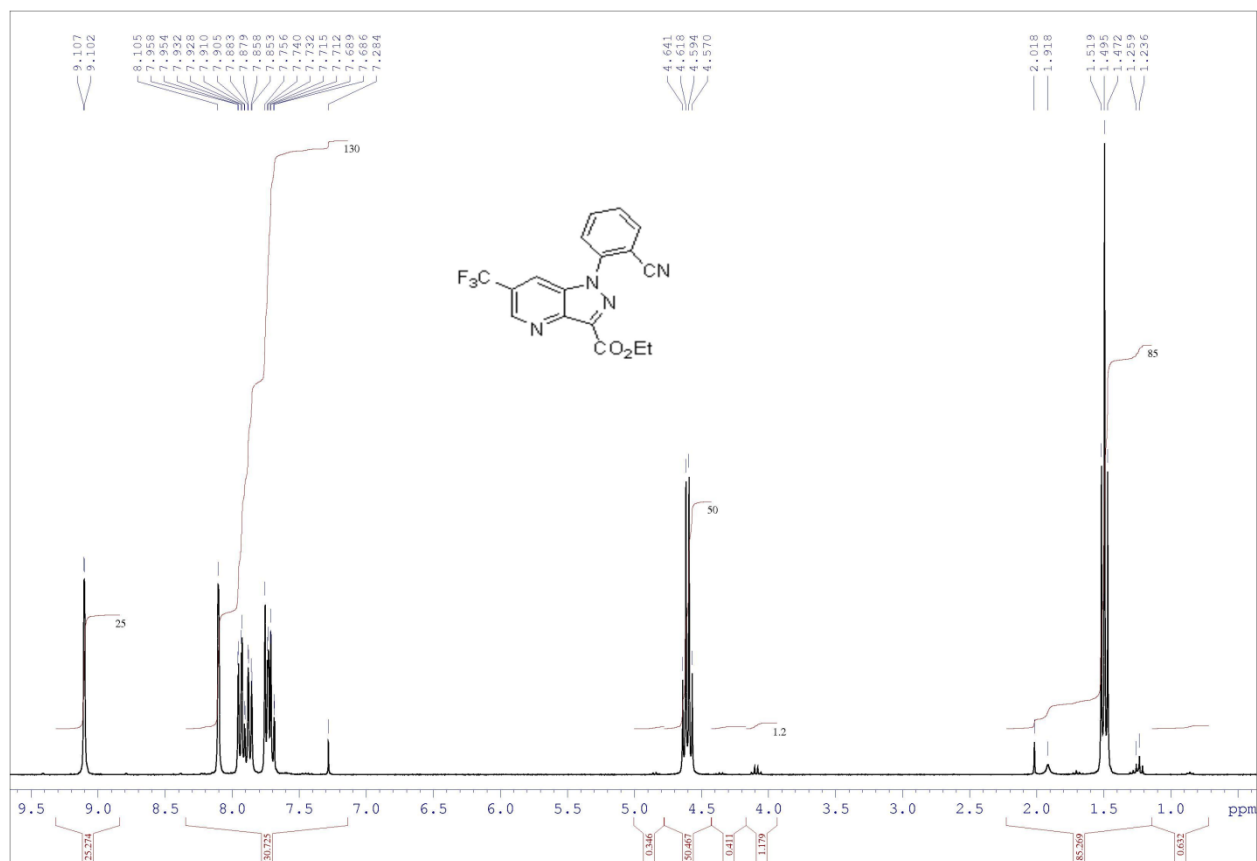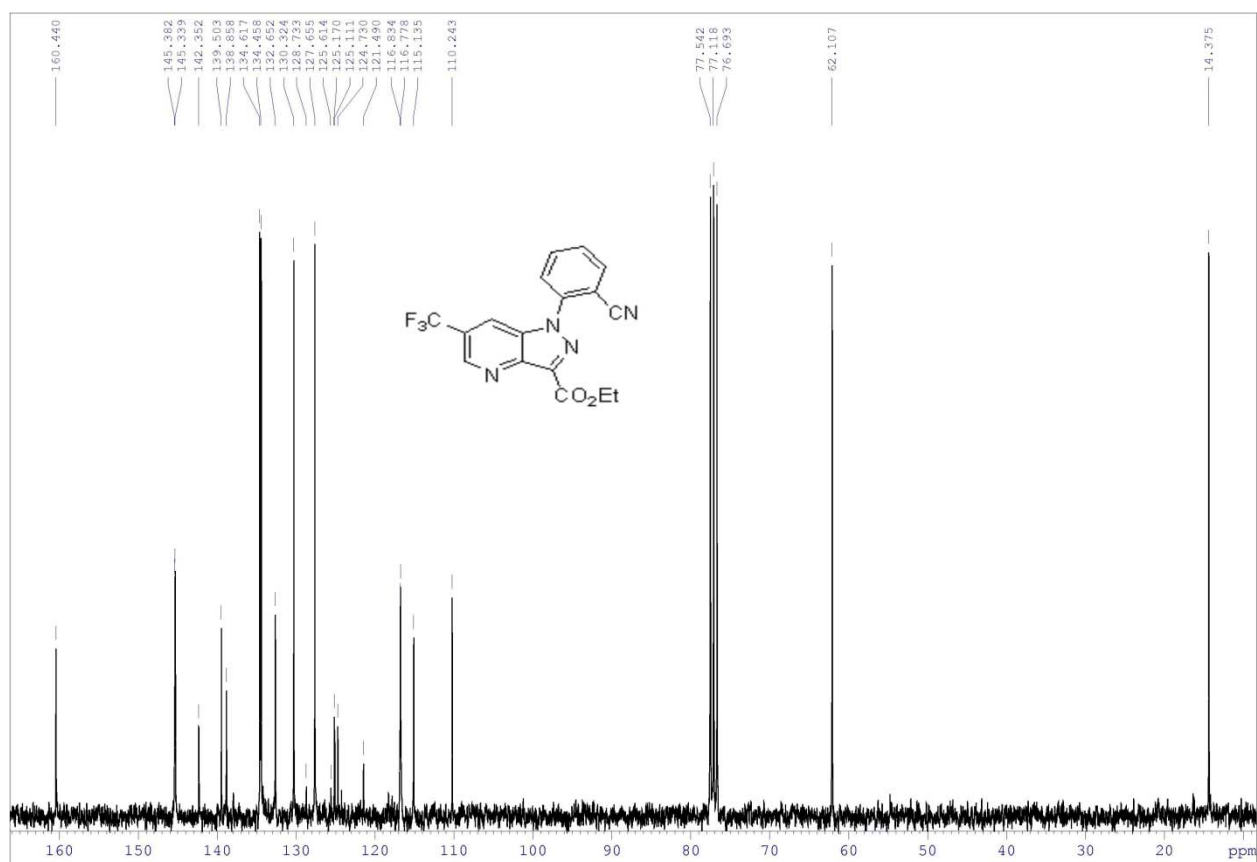



# HRMS spectrum of compound 5m

## Display Report

### Analysis Info

Analysis Name D:\Data\Kolotyrkina\2022\Bastrakov\1221016.d  
Method tune\_low.m  
Sample Name /LPIK VN-610  
Comment C17H11F3N4O2 mH 361.0906 calibrant added CH3CN

Acquisition Date 21.12.2022 11:09:08

Operator BDAL@DE  
Instrument / Ser# micrOTOF 10248

### Acquisition Parameter

|             |            |                      |          |                  |           |
|-------------|------------|----------------------|----------|------------------|-----------|
| Source Type | ESI        | Ion Polarity         | Positive | Set Nebulizer    | 0.4 Bar   |
| Focus       | Not active |                      |          | Set Dry Heater   | 180 °C    |
| Scan Begin  | 50 m/z     | Set Capillary        | 4500 V   | Set Dry Gas      | 4.0 l/min |
| Scan End    | 2500 m/z   | Set End Plate Offset | -500 V   | Set Divert Valve | Waste     |

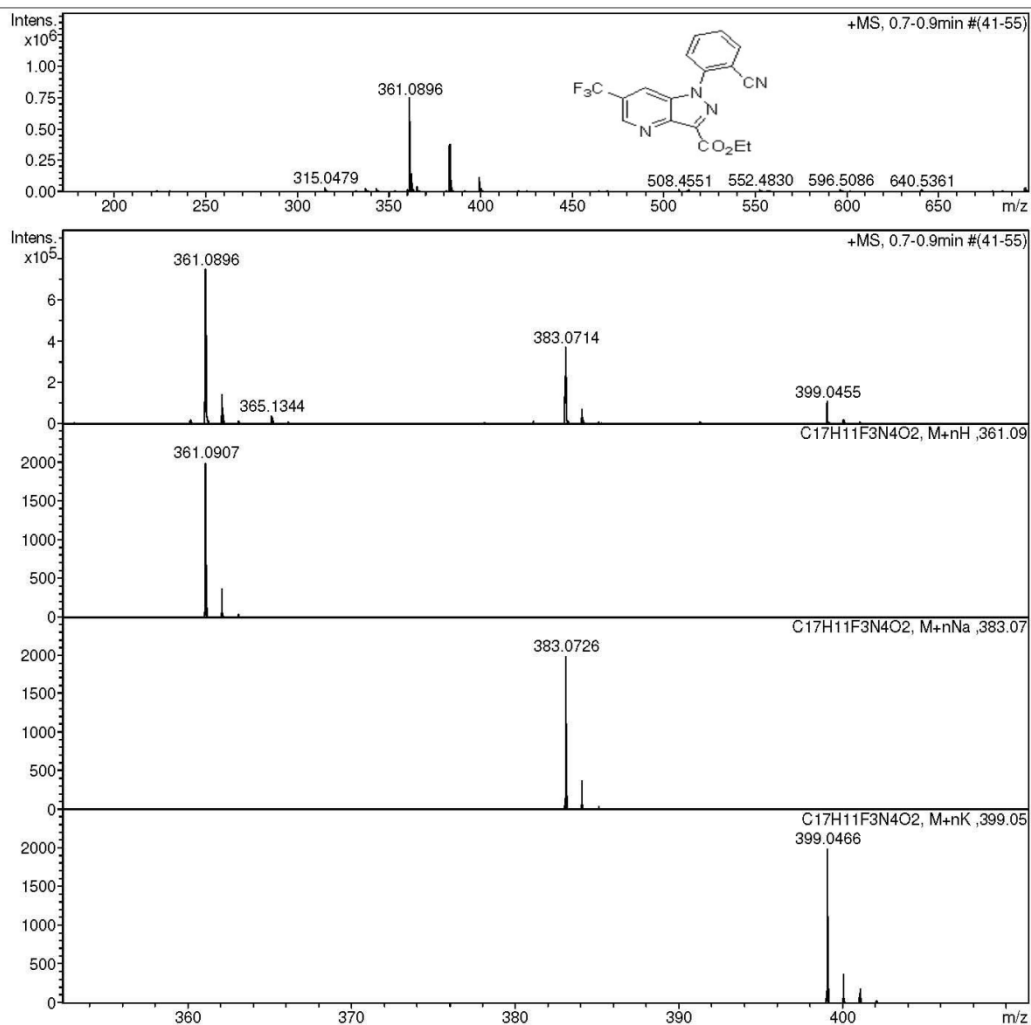

$^1\text{H}$  and  $^{13}\text{C}$  NMR spectra of compound **5n** in  $\text{CDCl}_3$

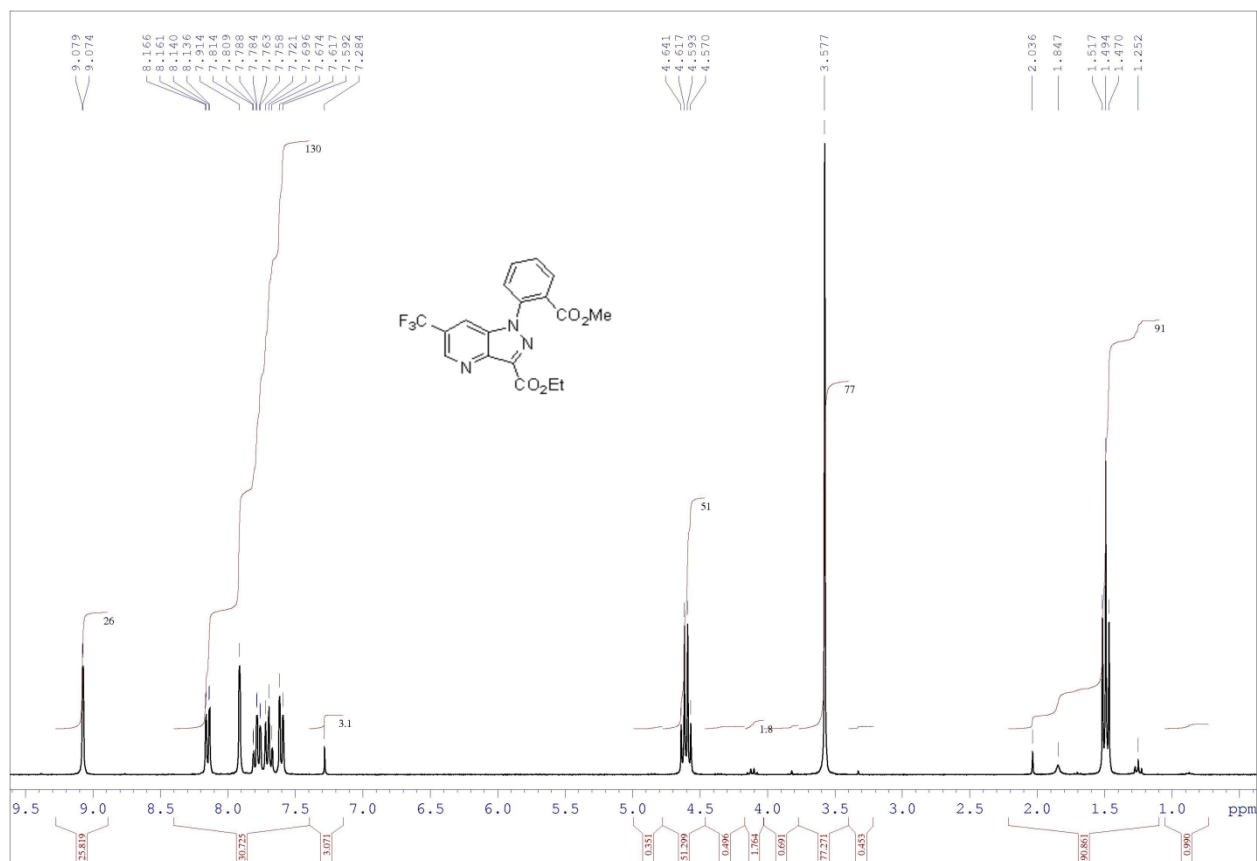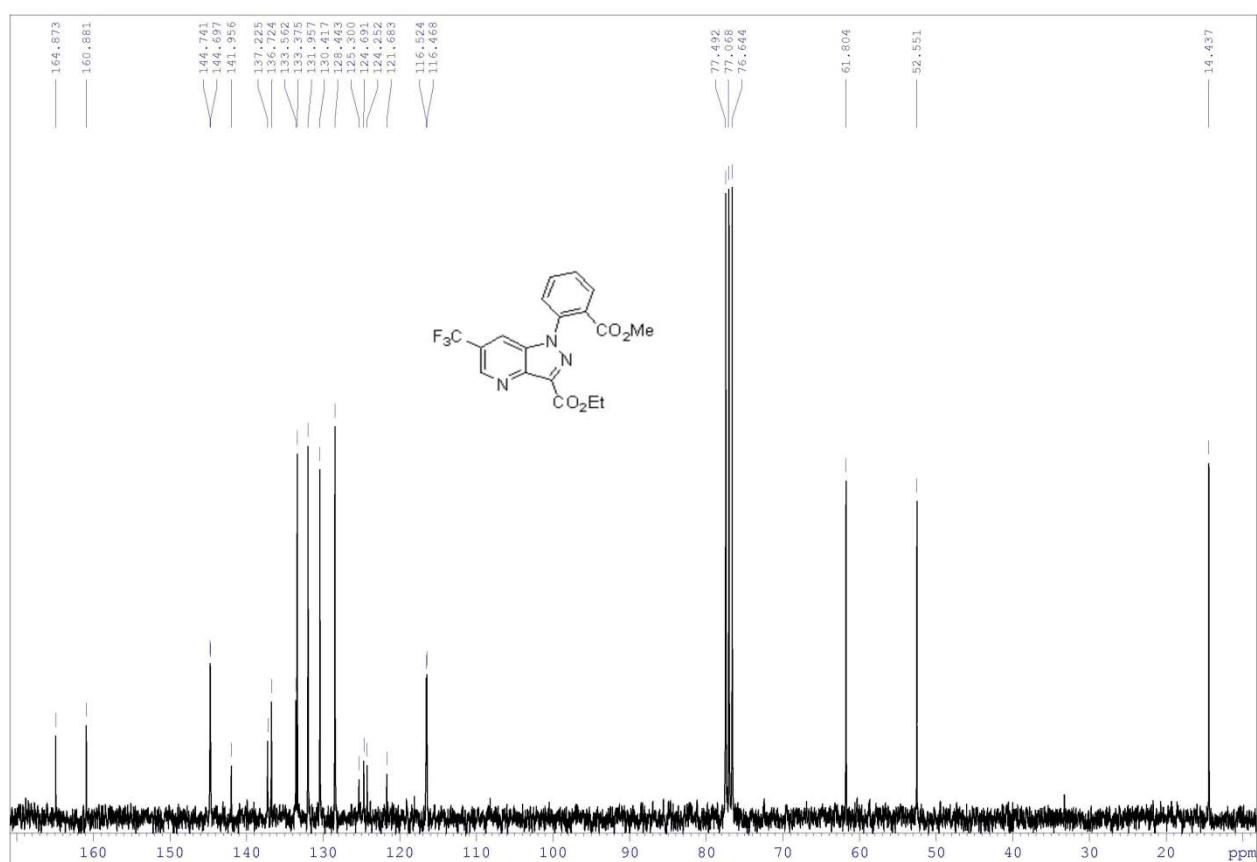

# HRMS spectrum of compound 5n

## Display Report

### Analysis Info

Analysis Name D:\Data\Kolotyrkina\2022\Bastrakov\1221017.d  
 Method tune\_low.m  
 Sample Name /LPIK VN-613  
 Comment C18H14F3N3O4 mH 394.1009 calibrant added CH3CN

Acquisition Date 21.12.2022 11:15:21

Operator BDAL@DE  
 Instrument / Ser# micrOTOF 10248

### Acquisition Parameter

|             |            |                      |          |                  |           |
|-------------|------------|----------------------|----------|------------------|-----------|
| Source Type | ESI        | Ion Polarity         | Positive | Set Nebulizer    | 0.4 Bar   |
| Focus       | Not active |                      |          | Set Dry Heater   | 180 °C    |
| Scan Begin  | 50 m/z     | Set Capillary        | 4500 V   | Set Dry Gas      | 4.0 l/min |
| Scan End    | 2500 m/z   | Set End Plate Offset | -500 V   | Set Divert Valve | Waste     |

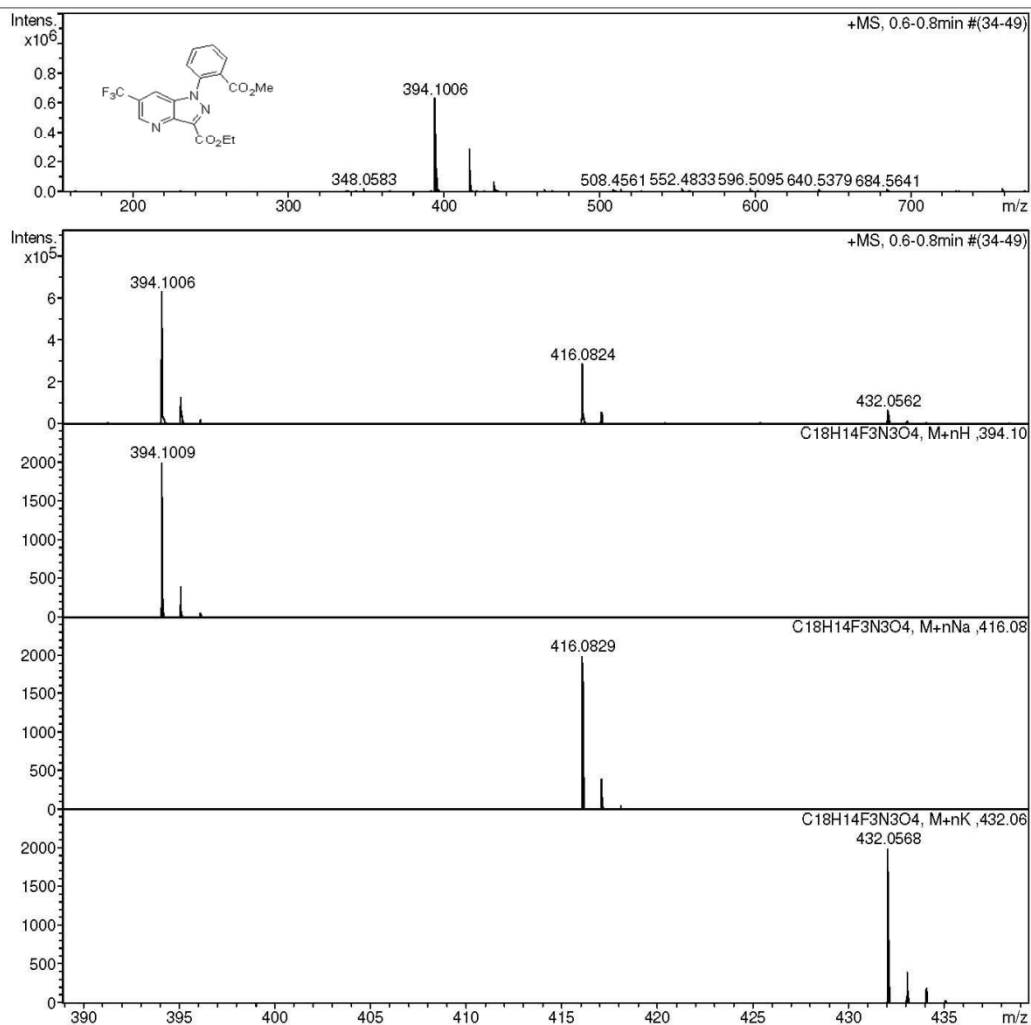

$^1\text{H}$  and  $^{13}\text{C}$  NMR spectra of compound **5o** in  $\text{CDCl}_3$

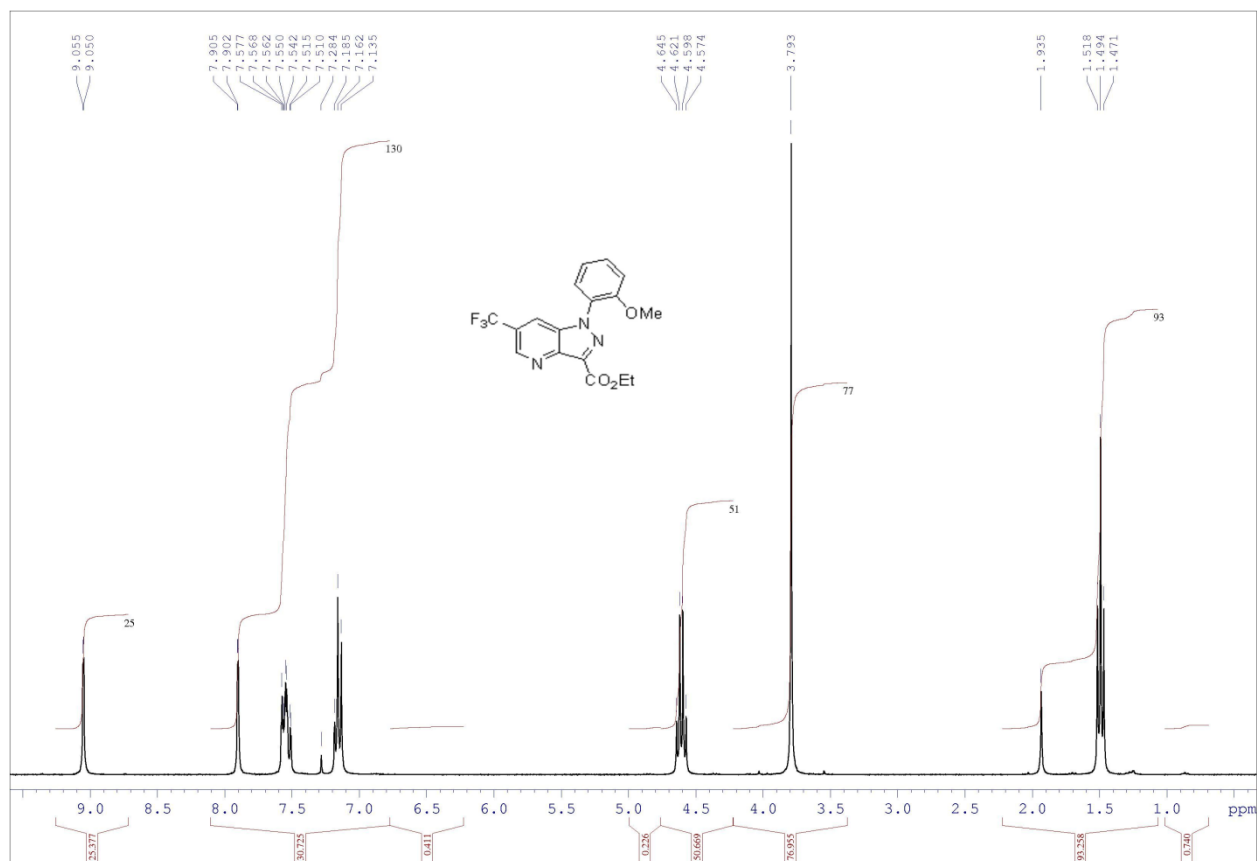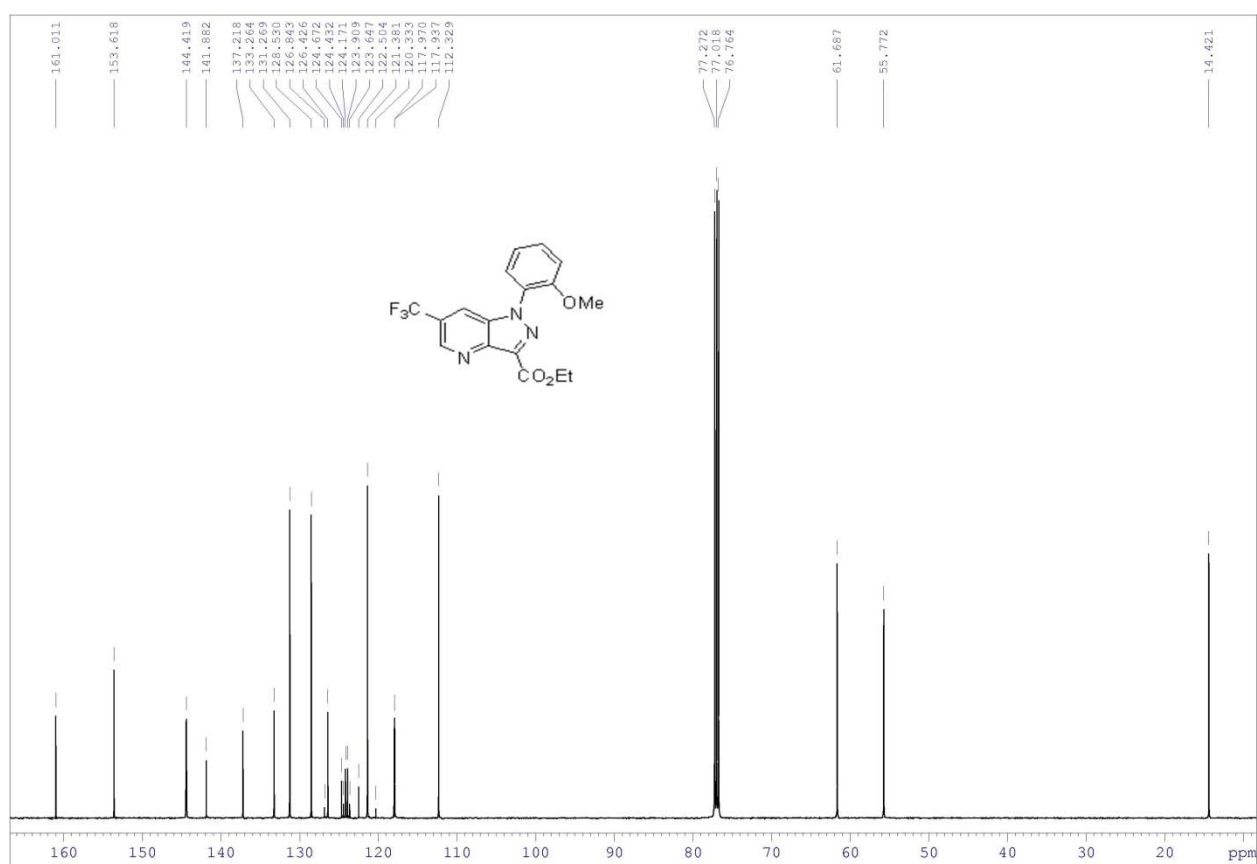

# HRMS spectrum of compound 5o

## Display Report

### Analysis Info

Analysis Name D:\Data\Kolotyrkina\2022\Bastrakov\1221028.d  
Method tune\_low.m  
Sample Name /LPIK VN-615  
Comment C17H14F3N3O3 mH 366.1060 calibrant added CH3CN

Acquisition Date 21.12.2022 14:40:42

Operator BDAL@DE  
Instrument / Ser# micrOTOF 10248

### Acquisition Parameter

|             |            |                      |          |                  |           |
|-------------|------------|----------------------|----------|------------------|-----------|
| Source Type | ESI        | Ion Polarity         | Positive | Set Nebulizer    | 0.4 Bar   |
| Focus       | Not active |                      |          | Set Dry Heater   | 180 °C    |
| Scan Begin  | 50 m/z     | Set Capillary        | 4500 V   | Set Dry Gas      | 4.0 l/min |
| Scan End    | 2500 m/z   | Set End Plate Offset | -500 V   | Set Divert Valve | Waste     |

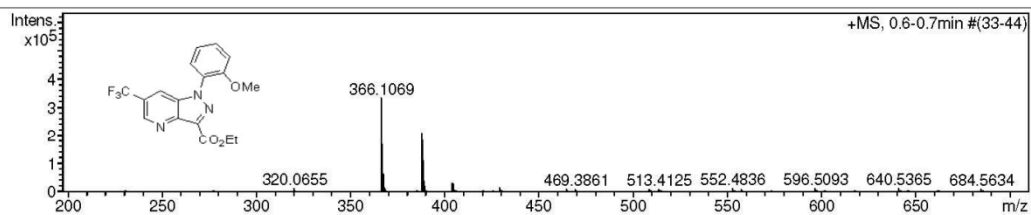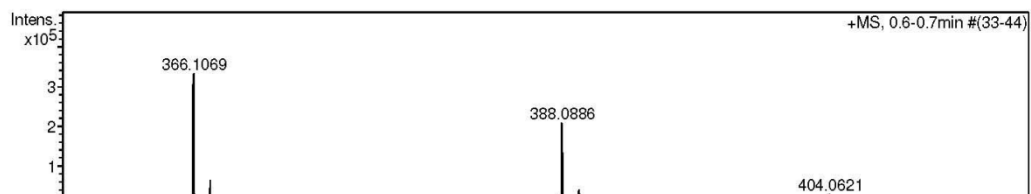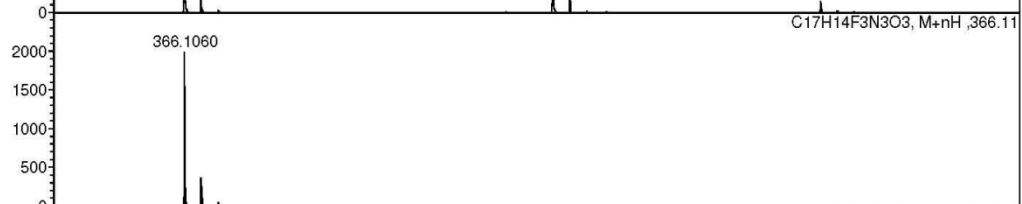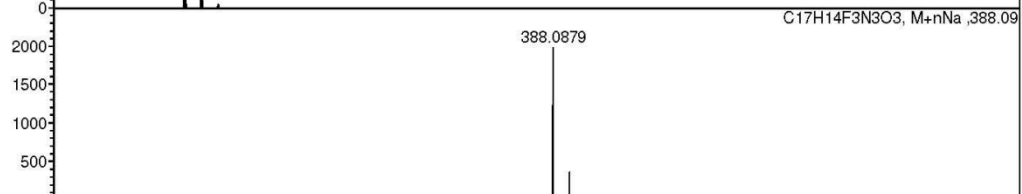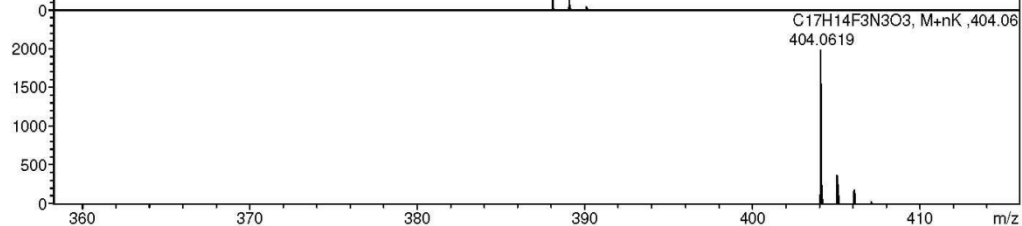

$^1\text{H}$  and  $^{13}\text{C}$  NMR spectra of compound **5p** in  $\text{CDCl}_3$

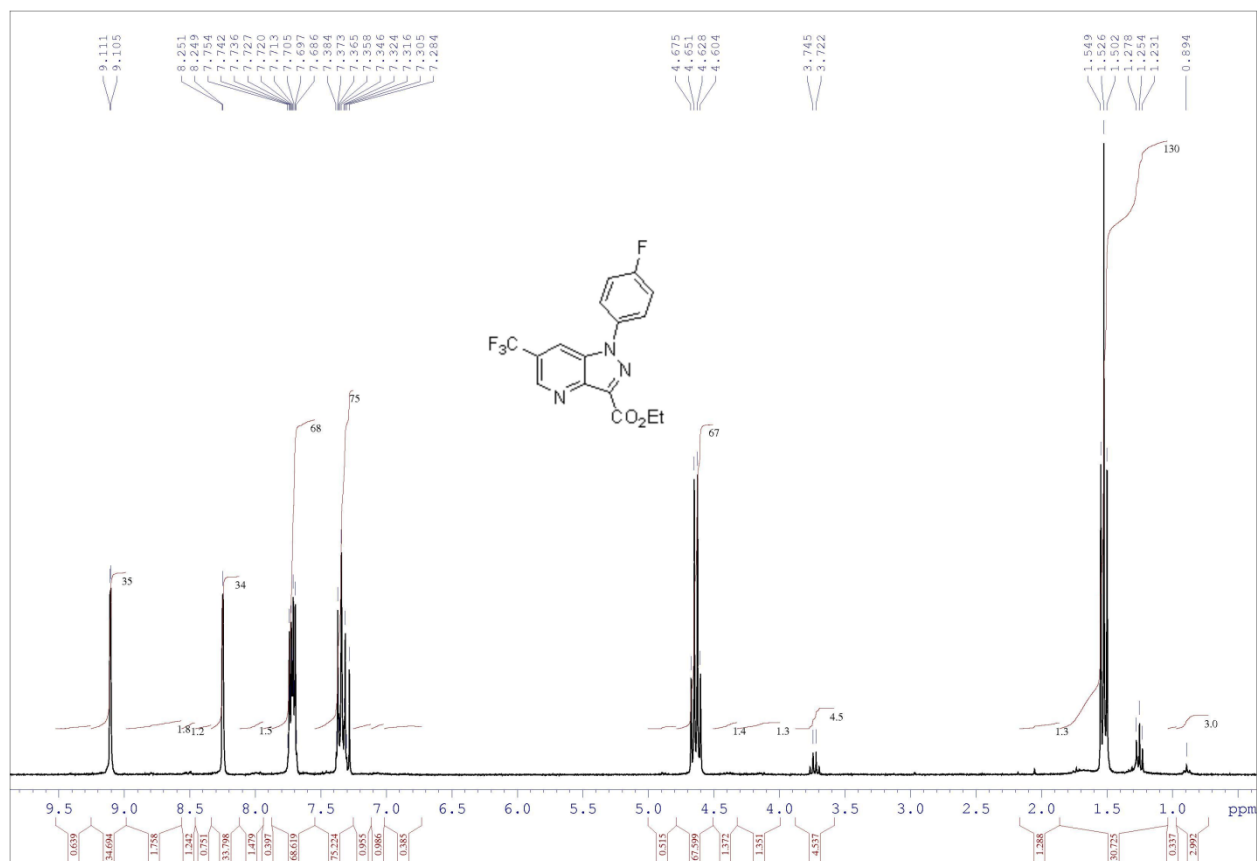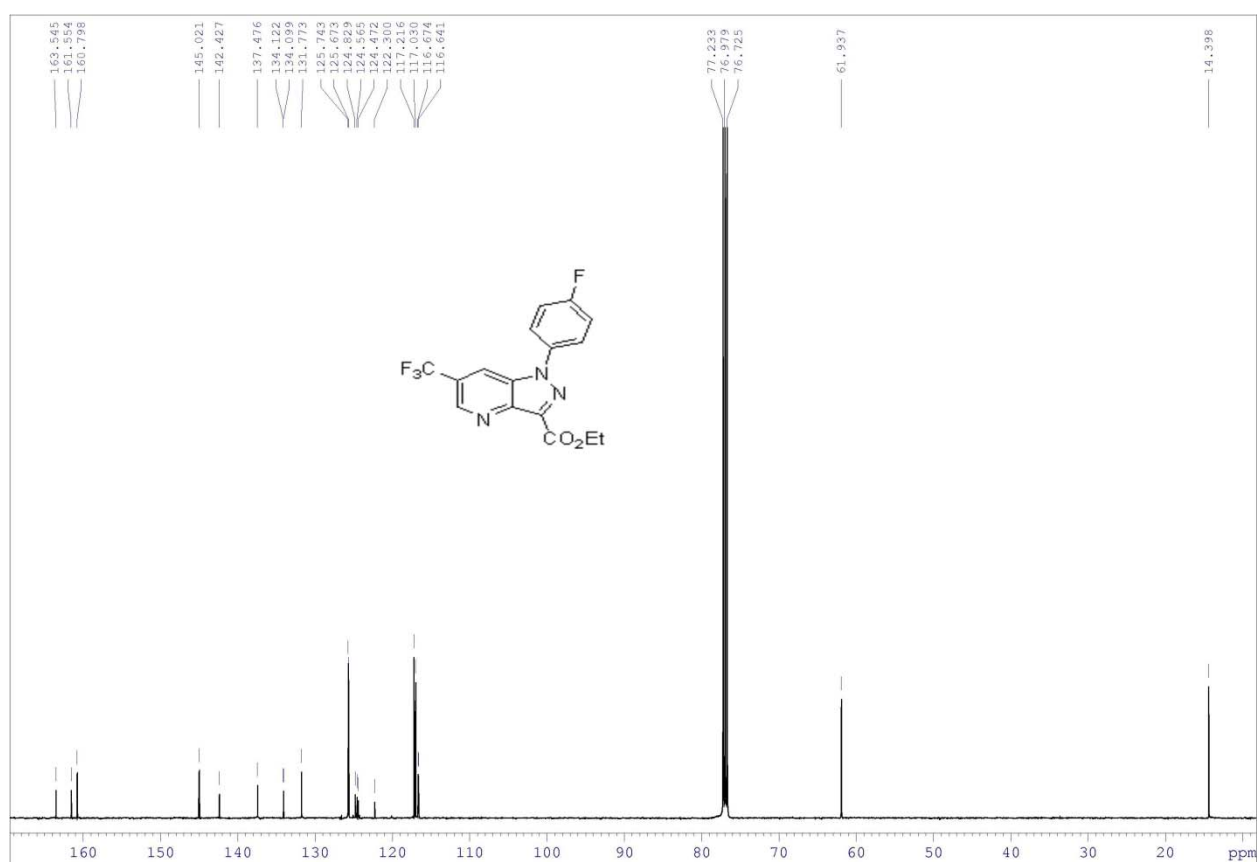

# HRMS spectrum of compound 5p

## Display Report

### Analysis Info

Analysis Name D:\Data\Kolotyrkina\2022\Bastrakov\1221029.d  
Method tune\_low.m  
Sample Name /LPIK VN-639  
Comment C16H11F4N3O2 mH 354.0860 calibrant added CH3CN

Acquisition Date 21.12.2022 14:45:02

Operator BDAL@DE  
Instrument / Ser# micrOTOF 10248

### Acquisition Parameter

|             |            |                      |          |                  |           |
|-------------|------------|----------------------|----------|------------------|-----------|
| Source Type | ESI        | Ion Polarity         | Positive | Set Nebulizer    | 0.4 Bar   |
| Focus       | Not active |                      |          | Set Dry Heater   | 180 °C    |
| Scan Begin  | 50 m/z     | Set Capillary        | 4500 V   | Set Dry Gas      | 4.0 l/min |
| Scan End    | 2500 m/z   | Set End Plate Offset | -500 V   | Set Divert Valve | Waste     |

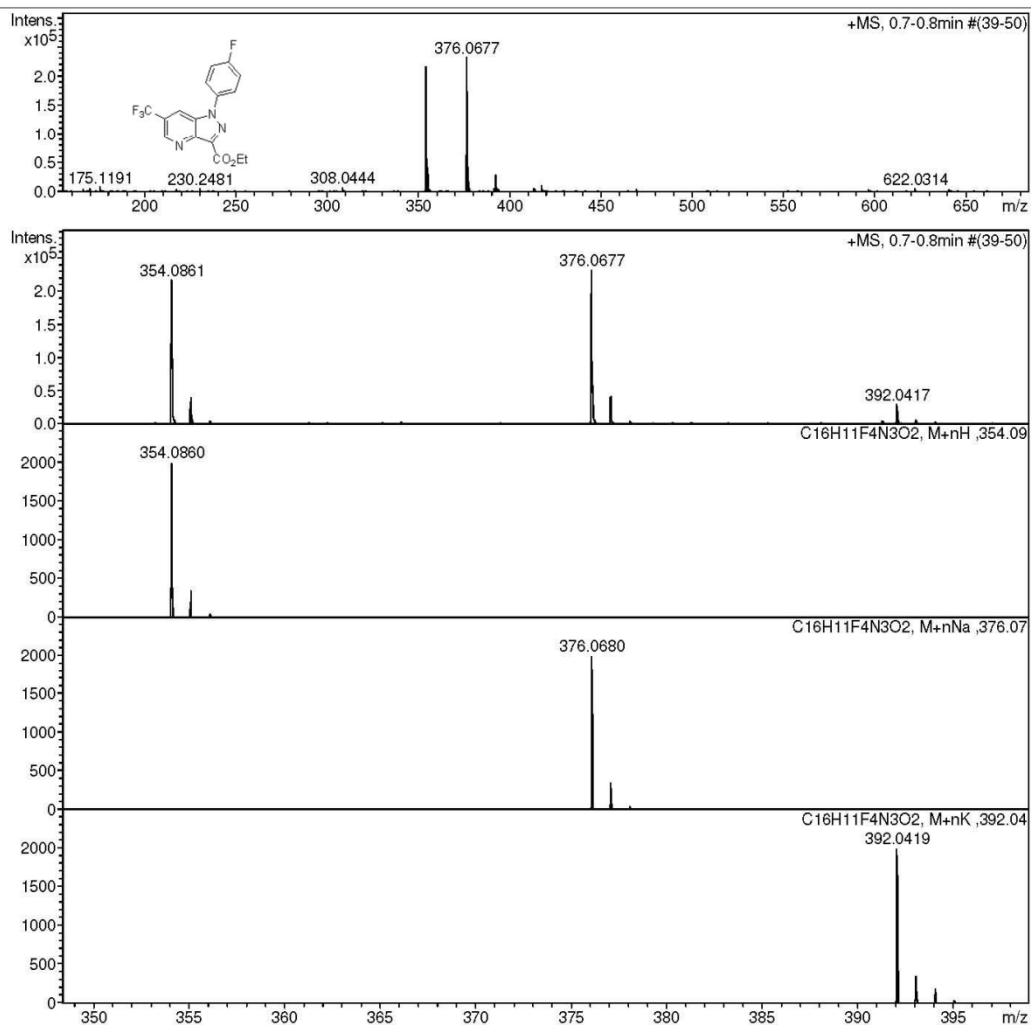

$^1\text{H}$  and  $^{13}\text{C}$  NMR spectra of compound **5q** in  $\text{CDCl}_3$

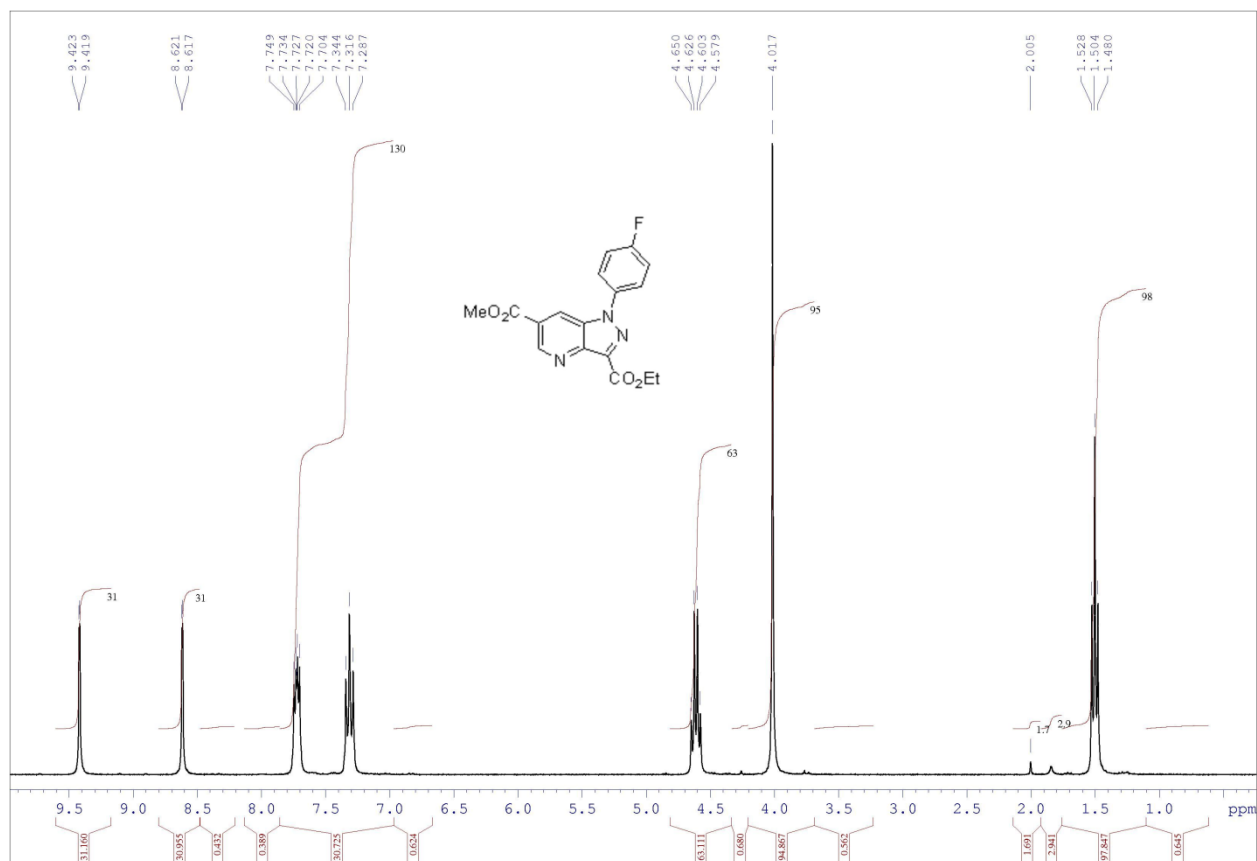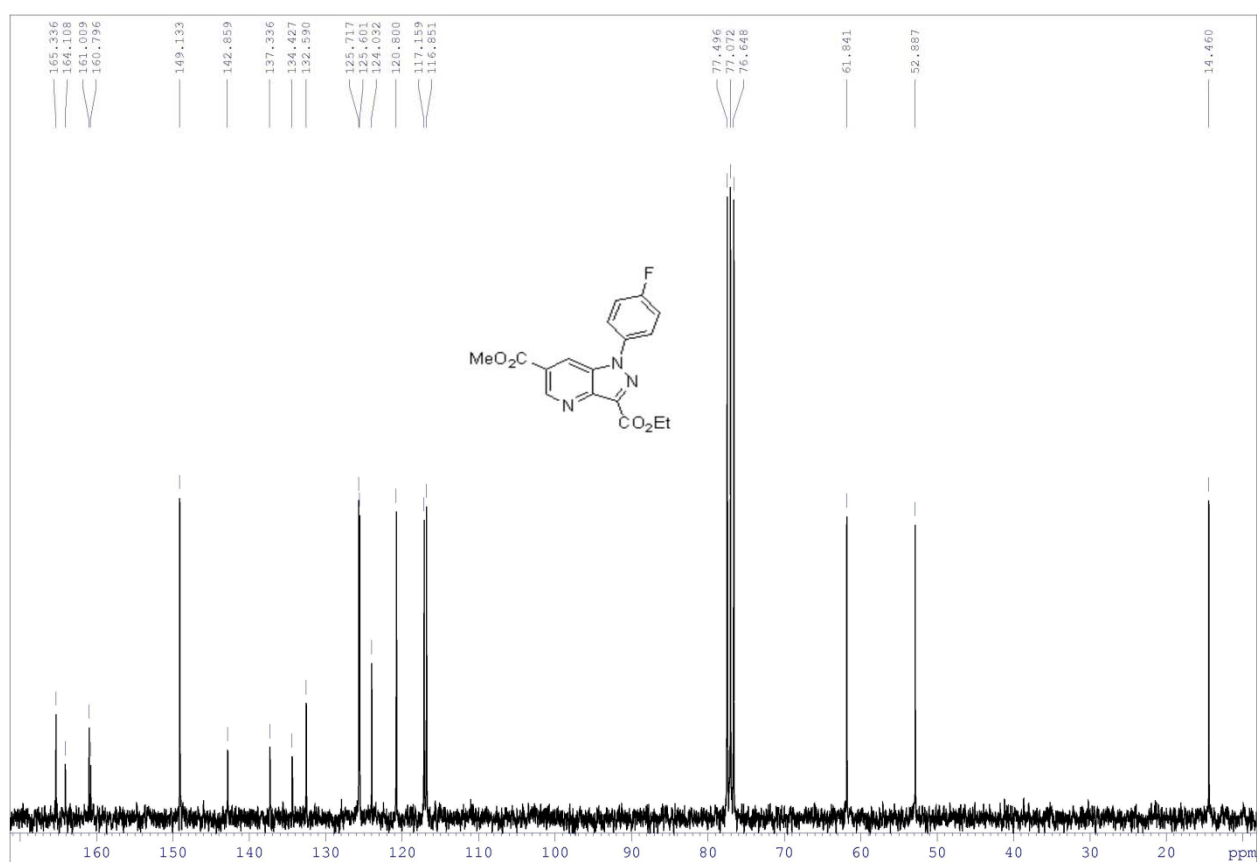



# HRMS spectrum of compound 5q

## Display Report

### Analysis Info

Analysis Name D:\Data\Kolotyrkina\2022\Bastrakov\1220018.d  
 Method tune\_low.m  
 Sample Name /LPIK VN-653  
 Comment C17H14FN3O4 mH 344.1041 calibrant added CH3CN

Acquisition Date 20.12.2022 15:09:44

Operator BDAL@DE  
 Instrument / Ser# micrOTOF 10248

### Acquisition Parameter

|             |            |                      |          |                  |           |
|-------------|------------|----------------------|----------|------------------|-----------|
| Source Type | ESI        | Ion Polarity         | Positive | Set Nebulizer    | 0.4 Bar   |
| Focus       | Not active |                      |          | Set Dry Heater   | 180 °C    |
| Scan Begin  | 50 m/z     | Set Capillary        | 4500 V   | Set Dry Gas      | 4.0 l/min |
| Scan End    | 2500 m/z   | Set End Plate Offset | -500 V   | Set Divert Valve | Waste     |

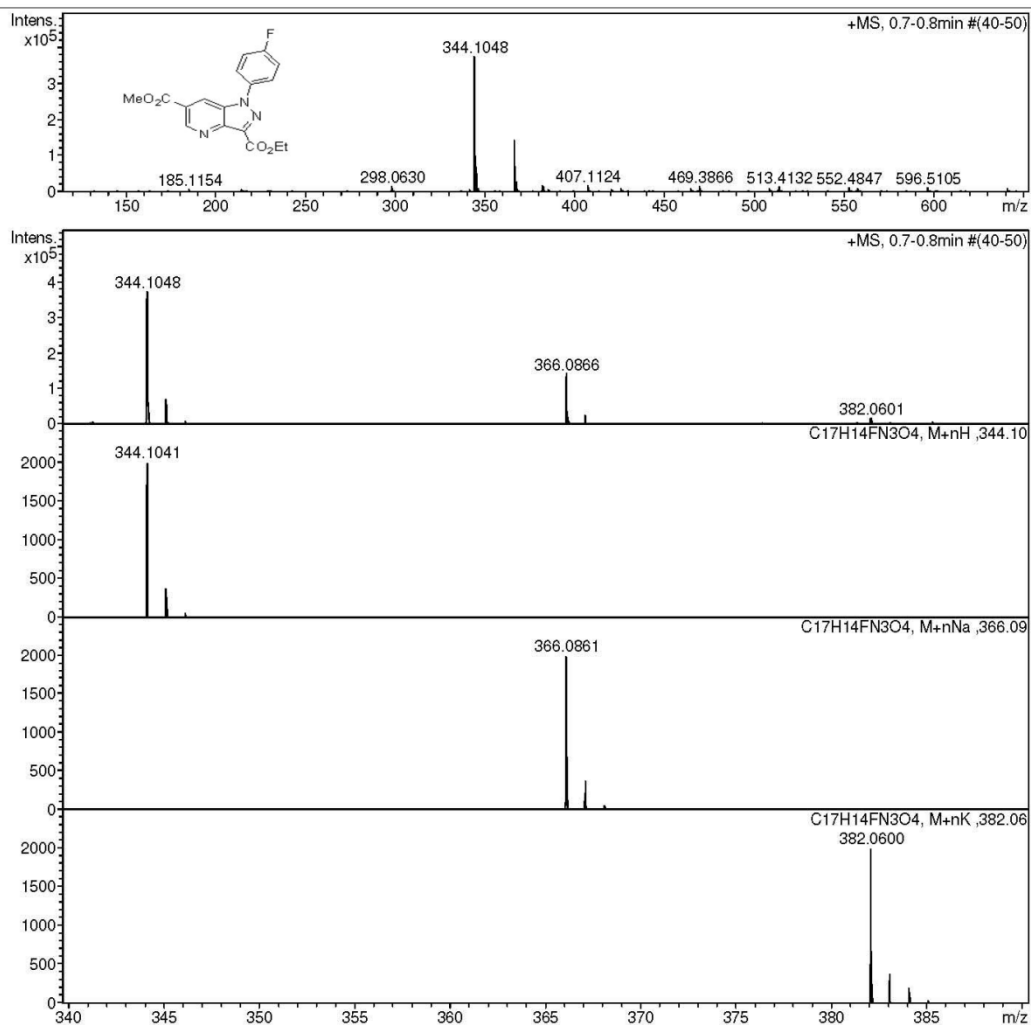

<sup>1</sup>H and <sup>13</sup>C NMR spectra of compound **5q'** in CDCl<sub>3</sub>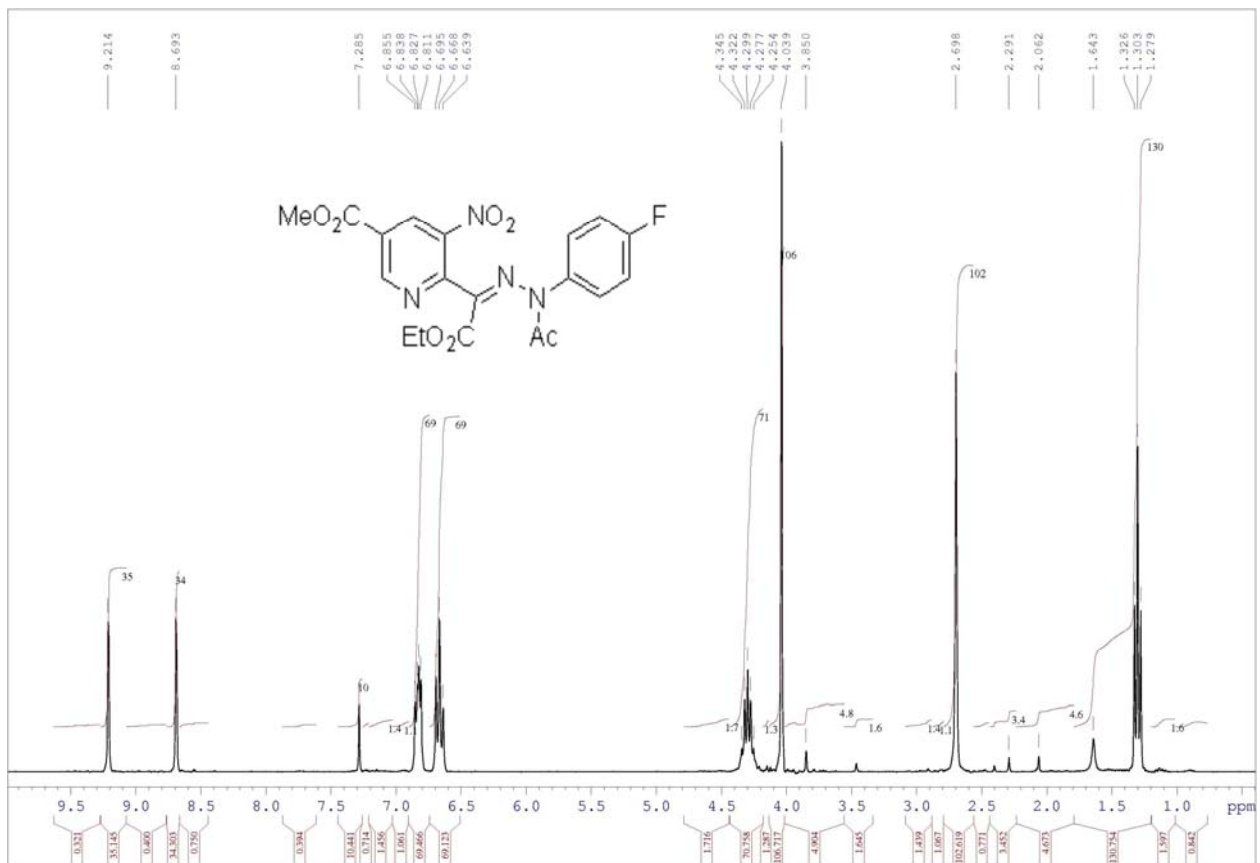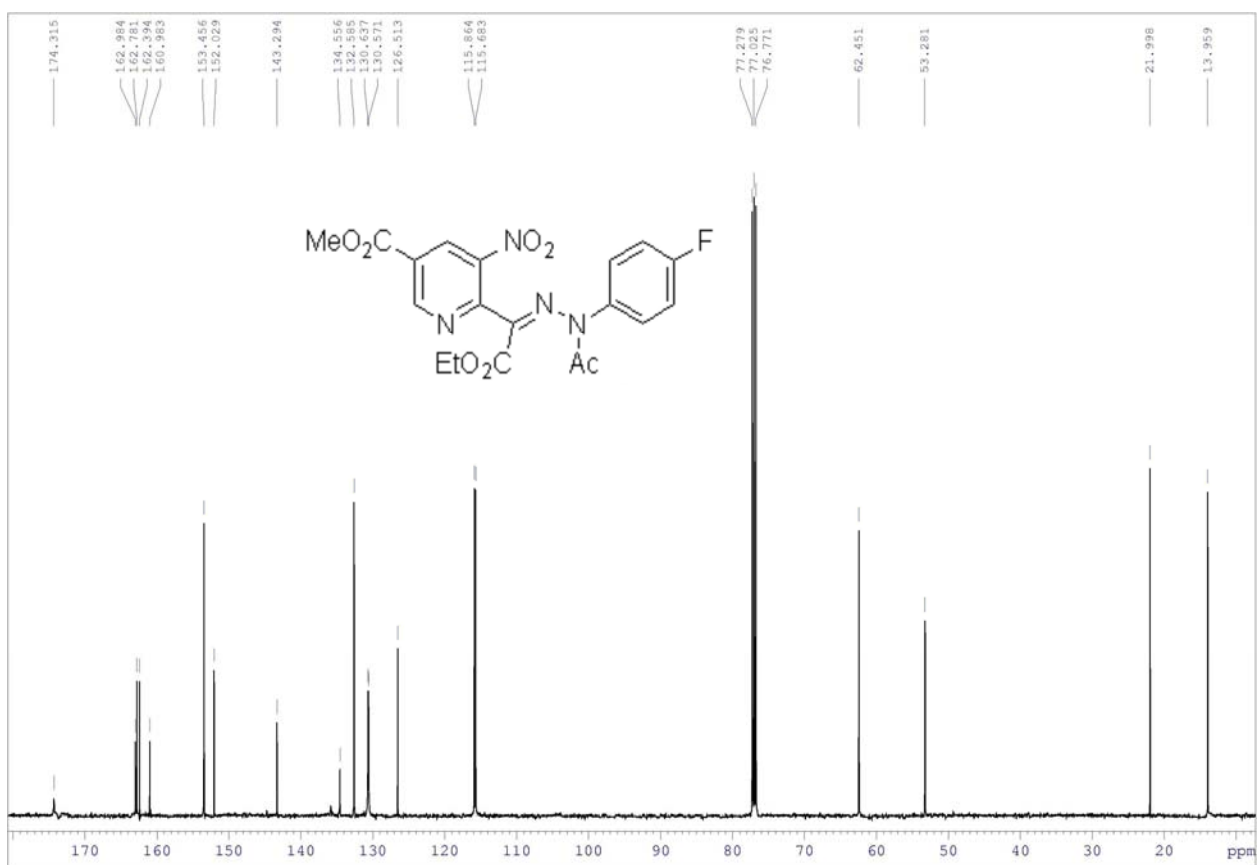

# HRMS spectrum of compound 5q'

## Display Report

### Analysis Info

Analysis Name D:\Data\Kolotyrykina\2022\Nikol'sky\1005014.d  
 Method tune\_50-1600\_pos\_15\_12.m  
 Sample Name /LPIK VN-621  
 Comment C19H17FN4O7 mH 433.1154 clb added CH3CN

Acquisition Date 05.10.2022 14:04:58  
 Operator BDAL@DE  
 Instrument / Ser# microTOF 10248

### Acquisition Parameter

|             |            |                      |          |                  |           |
|-------------|------------|----------------------|----------|------------------|-----------|
| Source Type | ESI        | Ion Polarity         | Positive | Set Nebulizer    | 0.4 Bar   |
| Focus       | Not active |                      |          | Set Dry Heater   | 180 °C    |
| Scan Begin  | 50 m/z     | Set Capillary        | 4500 V   | Set Dry Gas      | 4.0 l/min |
| Scan End    | 1600 m/z   | Set End Plate Offset | -500 V   | Set Divert Valve | Waste     |

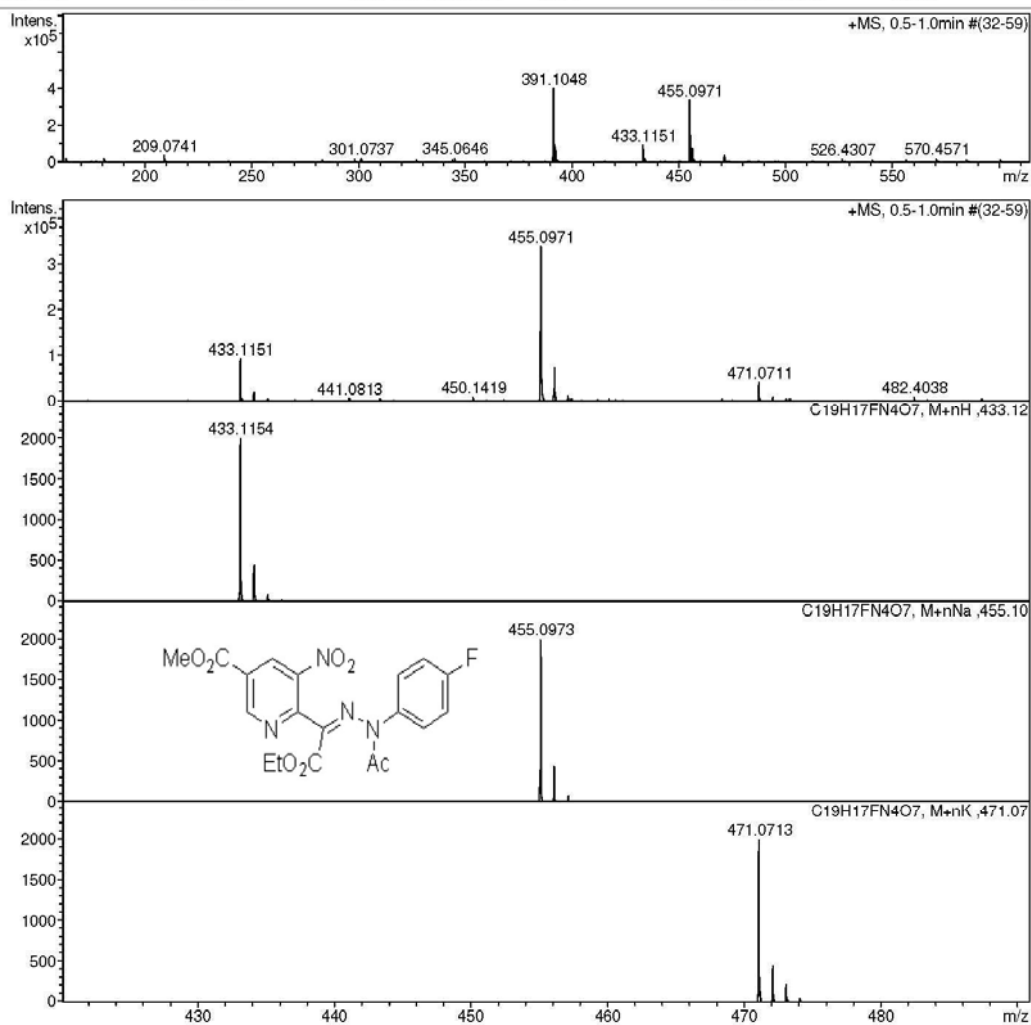

$^1\text{H}$  and  $^{13}\text{C}$  NMR spectra of compound **5r** in DMSO- $d_6$

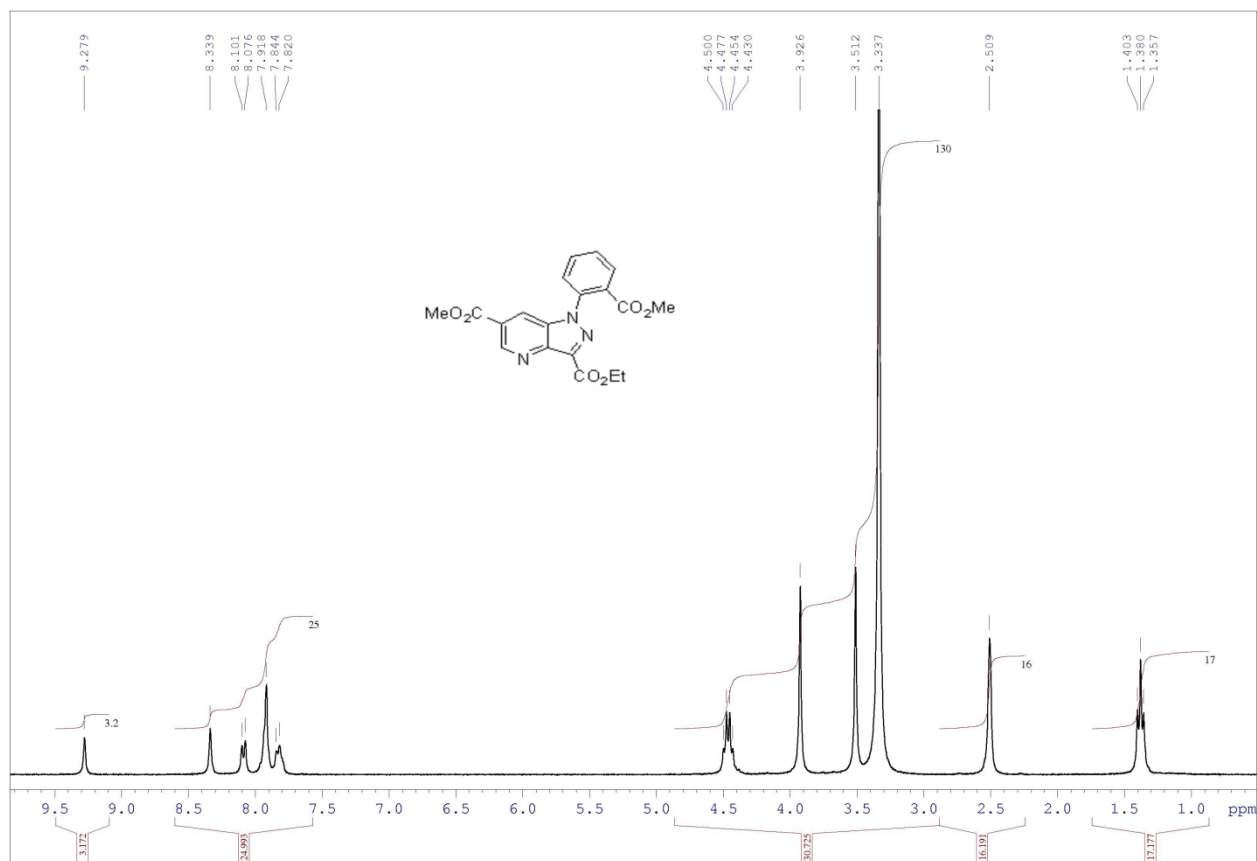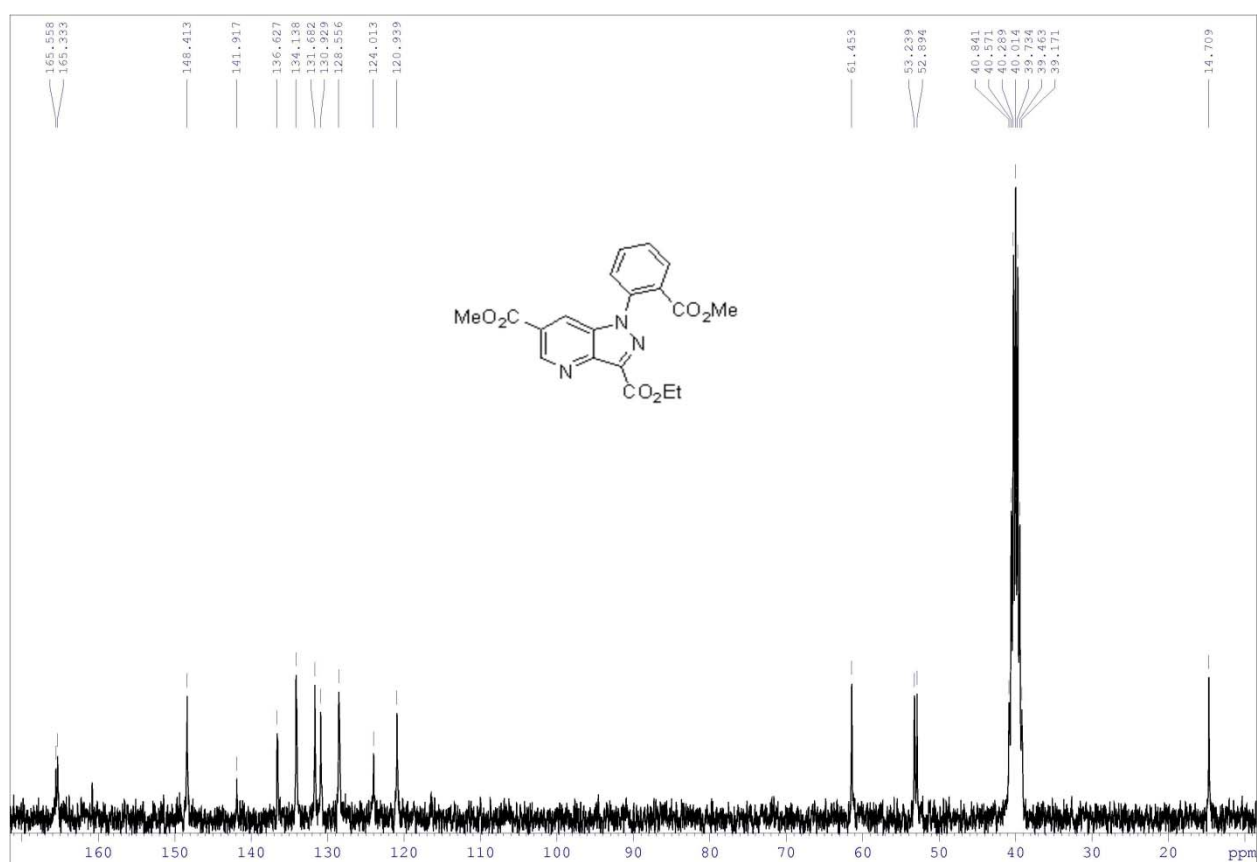

# HRMS spectrum of compound 5r

## Display Report

|                      |                                               |                   |                     |  |
|----------------------|-----------------------------------------------|-------------------|---------------------|--|
| <b>Analysis Info</b> |                                               | Acquisition Date  | 21.12.2022 15:03:57 |  |
| Analysis Name        | D:\Data\Kolotyarkina\2022\Bastrakov\1221033.d | Operator          | BDAL@DE             |  |
| Method               | tune_low.m                                    | Instrument / Ser# | micrOTOF 10248      |  |
| Sample Name          | /LPIK VN-618                                  |                   |                     |  |
| Comment              | C19H18N3O6 mH 384.1190 calibrant added CH3CN  |                   |                     |  |

|                              |            |                      |          |                  |           |
|------------------------------|------------|----------------------|----------|------------------|-----------|
| <b>Acquisition Parameter</b> |            | Ion Polarity         | Positive | Set Nebulizer    | 0.4 Bar   |
| Source Type                  | ESI        | Set Capillary        | 4500 V   | Set Dry Heater   | 180 °C    |
| Focus                        | Not active | Set End Plate Offset | -500 V   | Set Dry Gas      | 4.0 l/min |
| Scan Begin                   | 50 m/z     |                      |          | Set Divert Valve | Waste     |
| Scan End                     | 2500 m/z   |                      |          |                  |           |

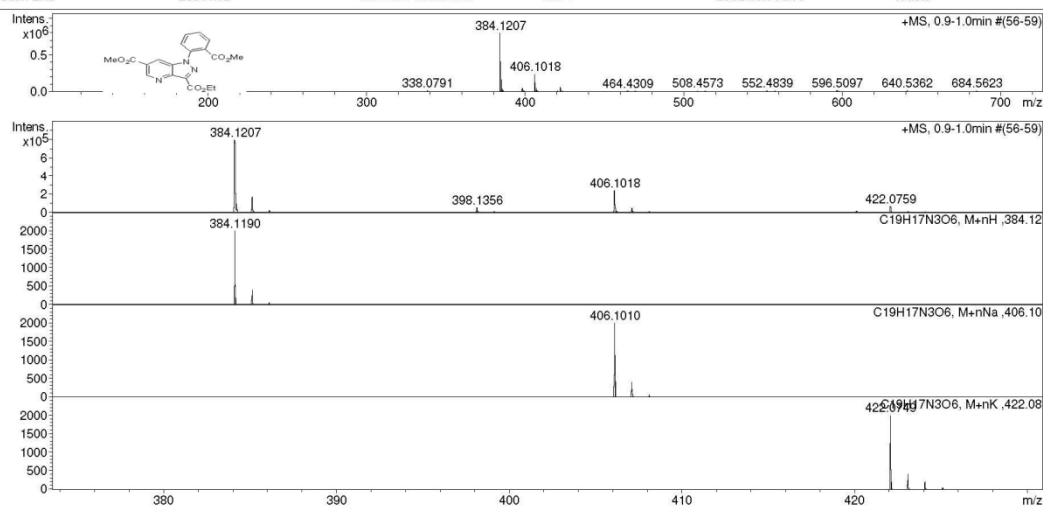

$^1\text{H}$  and  $^{13}\text{C}$  NMR spectra of compound **5s** in  $\text{CDCl}_3$

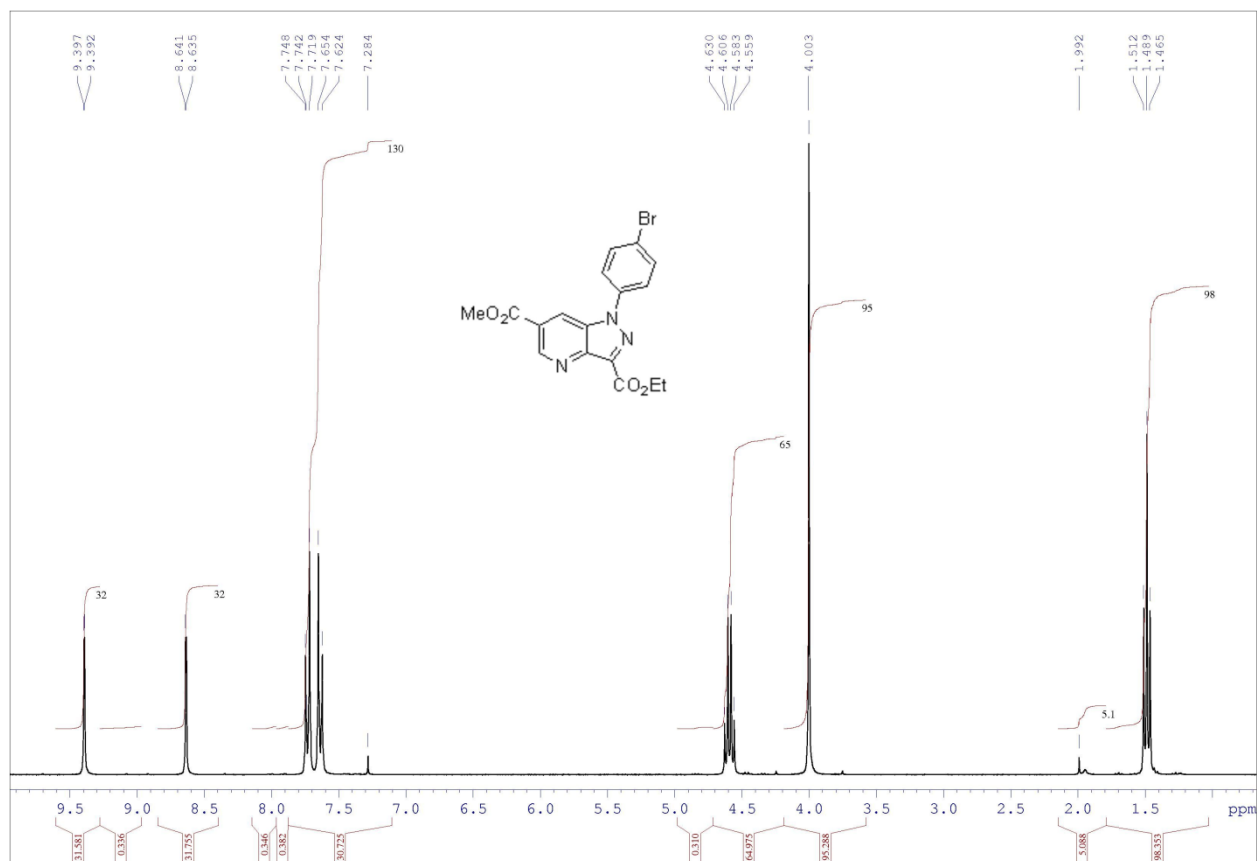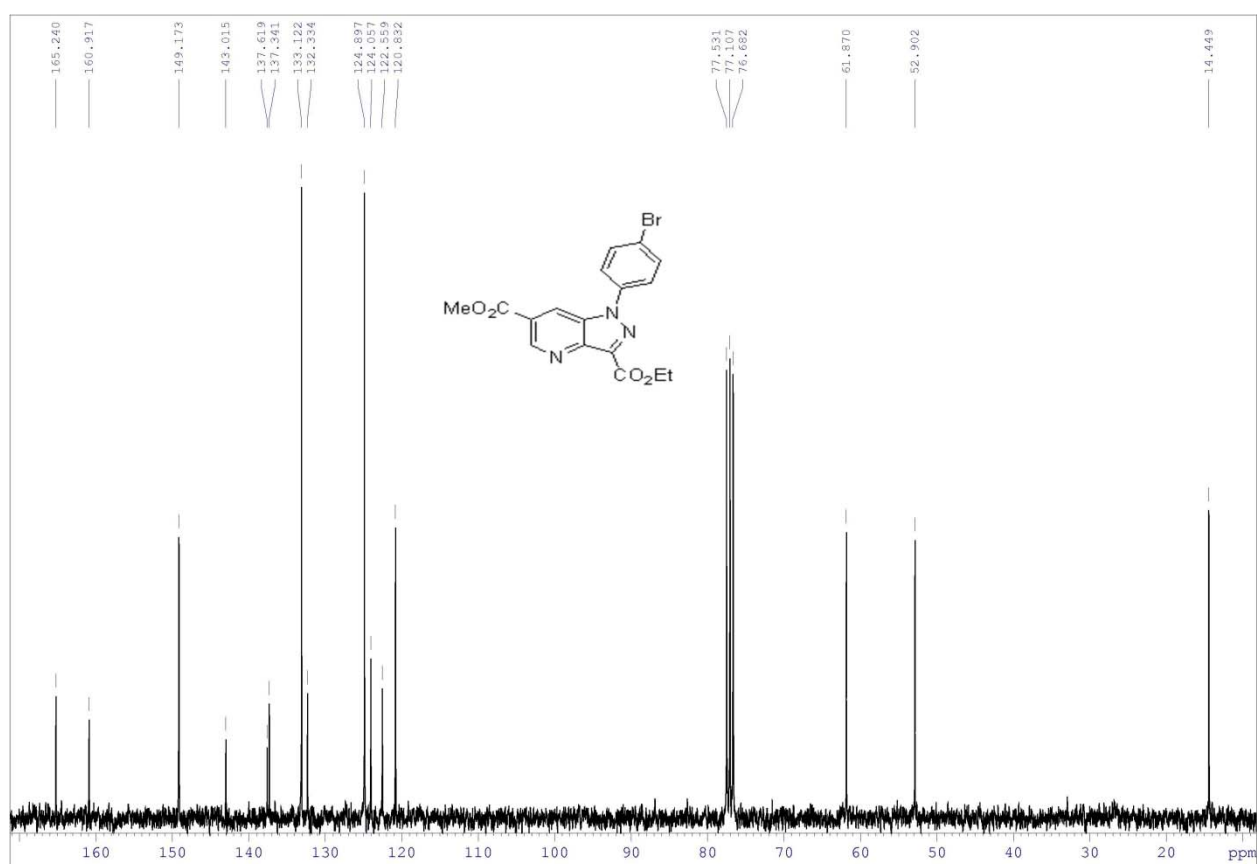

# HRMS spectrum of compound 5s

## Display Report

| Analysis Info |                                                | Acquisition Date  | 21.12.2022 15:10:39 |
|---------------|------------------------------------------------|-------------------|---------------------|
| Analysis Name | D:\Data\Kolotyrykina\2022\Bastrakov\1221034.d  | Operator          | BDAL@DE             |
| Method        | tune_low.m                                     | Instrument / Ser# | micrOTOF 10248      |
| Sample Name   | /LPIK VN-854                                   |                   |                     |
| Comment       | C17H14BrN3O4 mH 404.0240 calibrant added CH3CN |                   |                     |

| Acquisition Parameter |            | Ion Polarity         | Positive | Set Nebulizer    | 0.4 Bar   |
|-----------------------|------------|----------------------|----------|------------------|-----------|
| Source Type           | ESI        |                      |          | Set Dry Heater   | 180 °C    |
| Focus                 | Not active | Set Capillary        | 4500 V   | Set Dry Gas      | 4.0 l/min |
| Scan Begin            | 50 m/z     | Set End Plate Offset | -500 V   | Set Divert Valve | Waste     |
| Scan End              | 2500 m/z   |                      |          |                  |           |

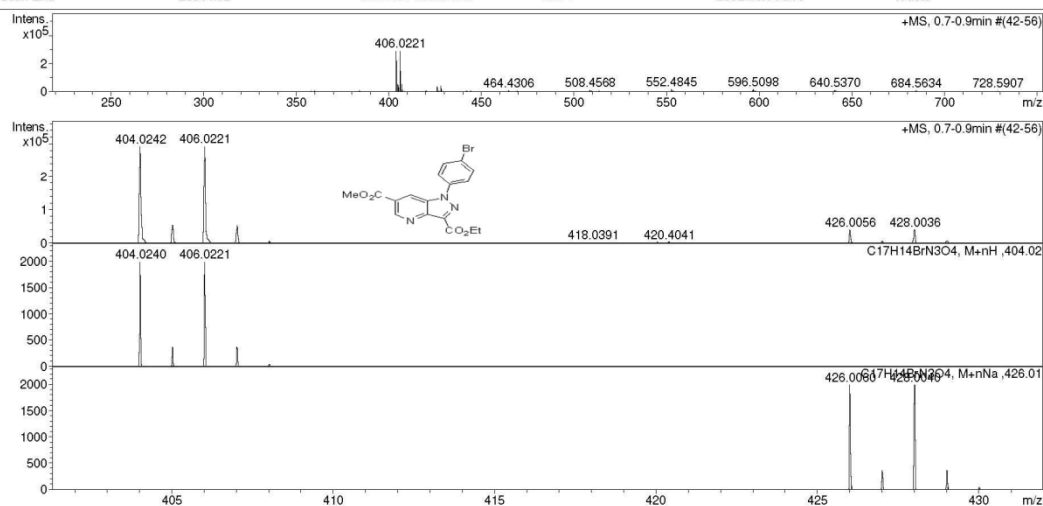

$^1\text{H}$  spectrum of compound **7a** in  $\text{CDCl}_3$

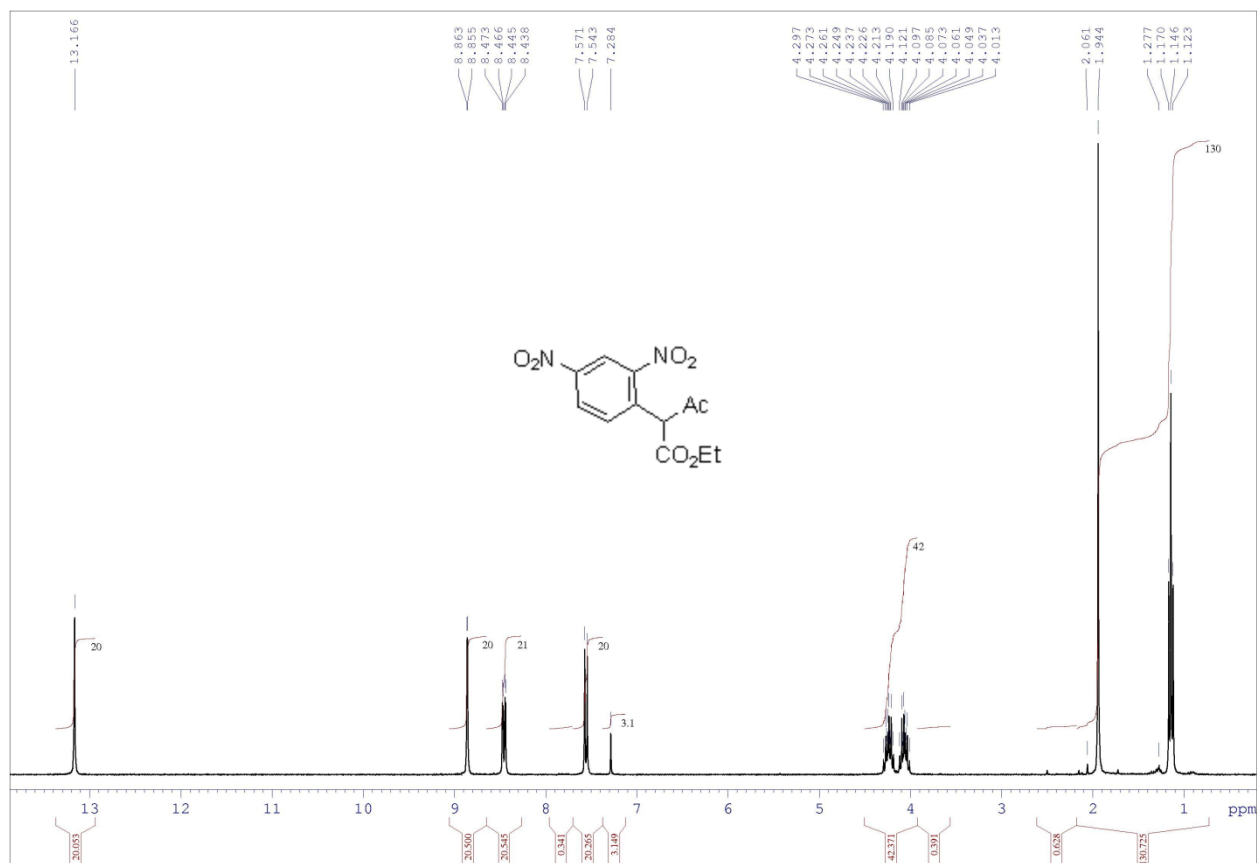



$^1\text{H}$  and  $^{13}\text{C}$  NMR spectra of compound **7b** in  $\text{CDCl}_3$

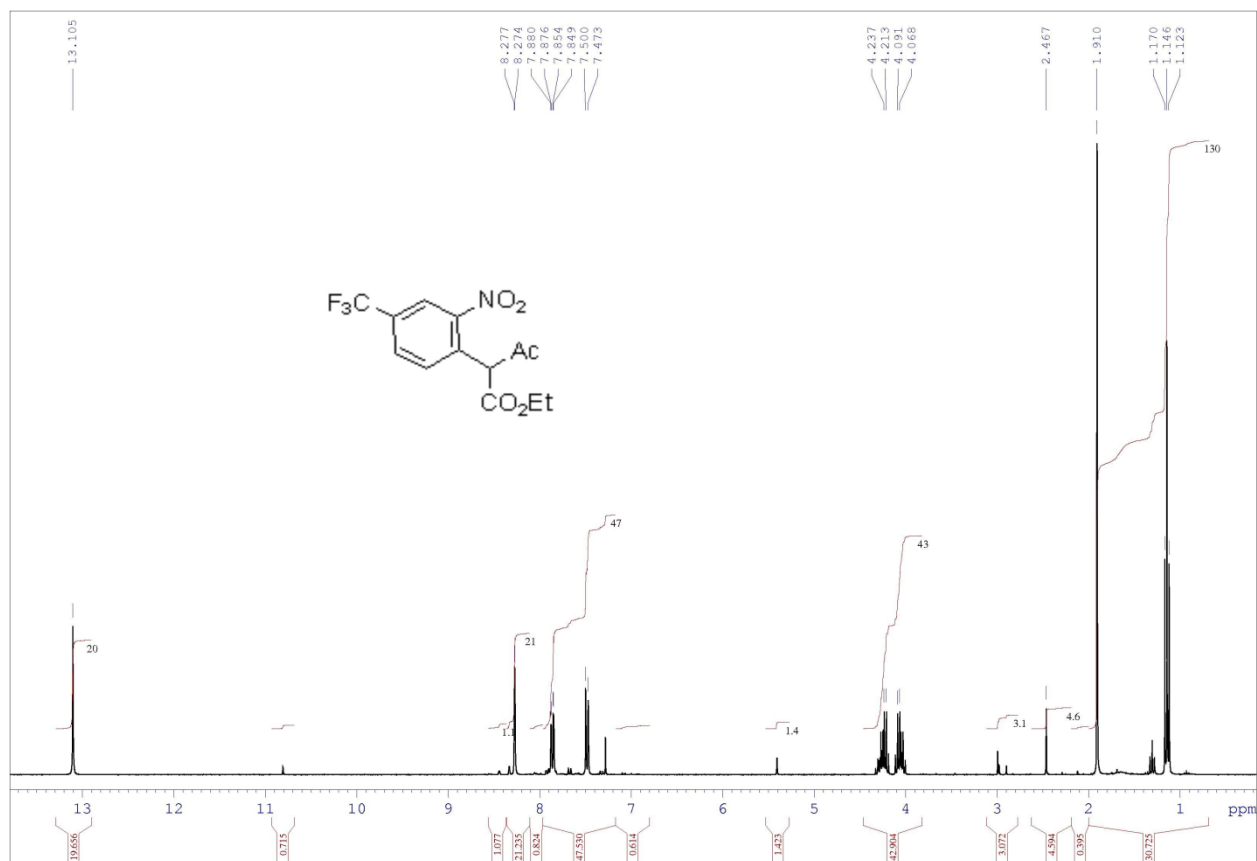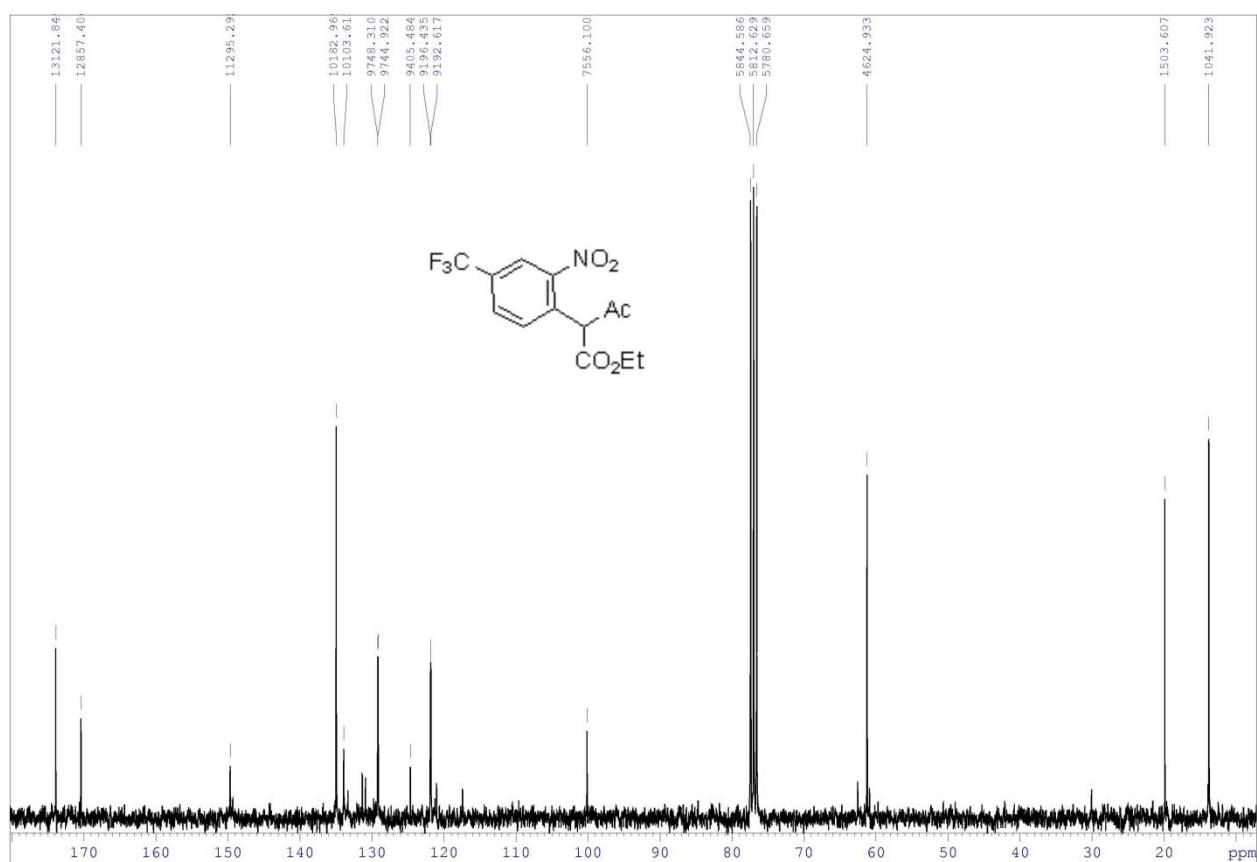

**<sup>1</sup>H NMR spectrum of compound 7c**

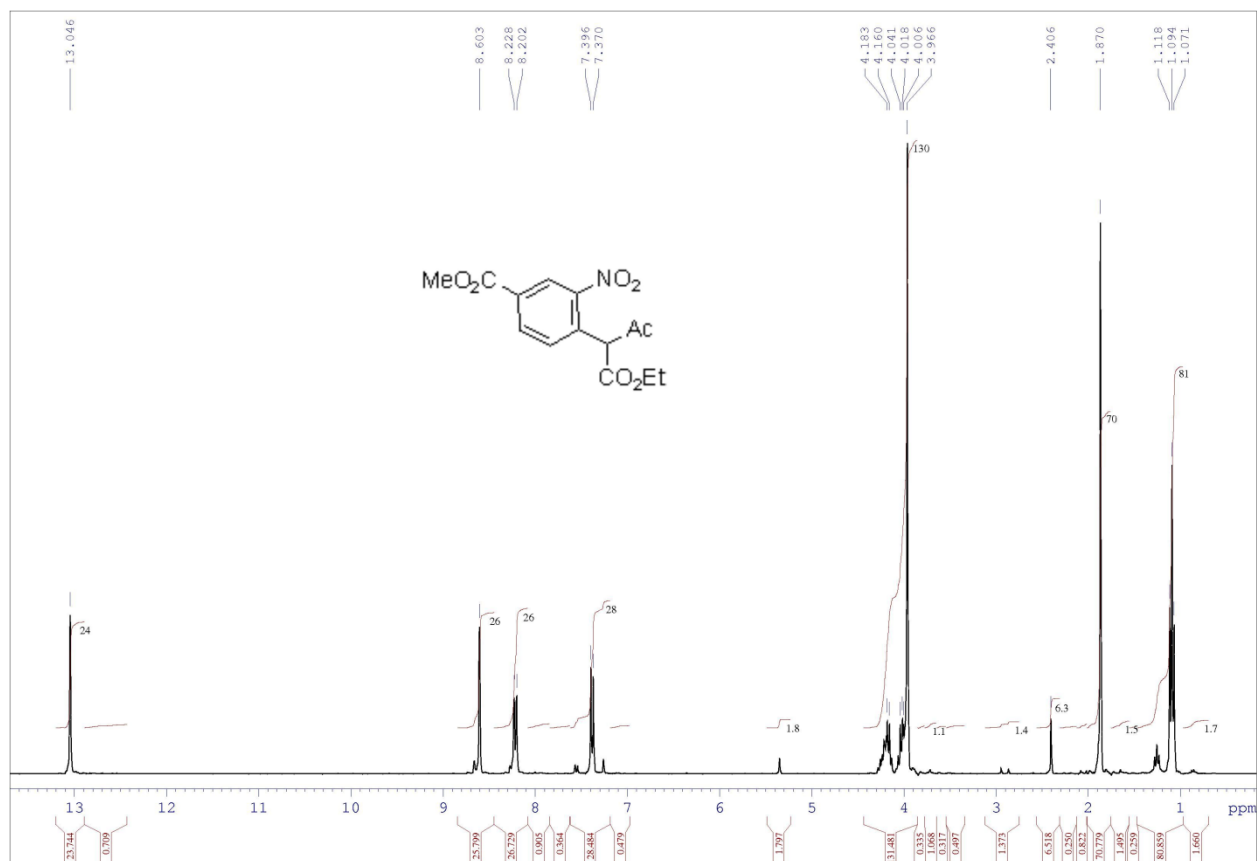

# HRMS spectrum of compound 7c

## Display Report

### Analysis Info

Analysis Name D:\Data\Kolotyrkina\2022\Bastrakov\1221004.d  
 Method tune\_low.m  
 Sample Name /LPIK YM-19  
 Comment C14H15NO7 mH 310.0921 calibrant added CH3CN

Acquisition Date 21.12.2022 9:53:27  
 Operator BDAL@DE  
 Instrument / Ser# micrOTOF 10248

### Acquisition Parameter

|             |            |                      |          |                  |           |
|-------------|------------|----------------------|----------|------------------|-----------|
| Source Type | ESI        | Ion Polarity         | Positive | Set Nebulizer    | 0.4 Bar   |
| Focus       | Not active |                      |          | Set Dry Heater   | 180 °C    |
| Scan Begin  | 50 m/z     | Set Capillary        | 4500 V   | Set Dry Gas      | 4.0 l/min |
| Scan End    | 2500 m/z   | Set End Plate Offset | -500 V   | Set Divert Valve | Waste     |

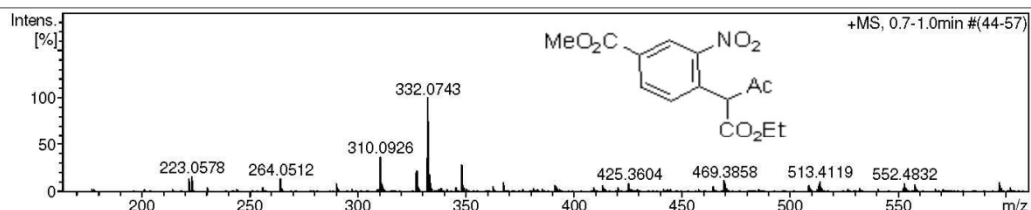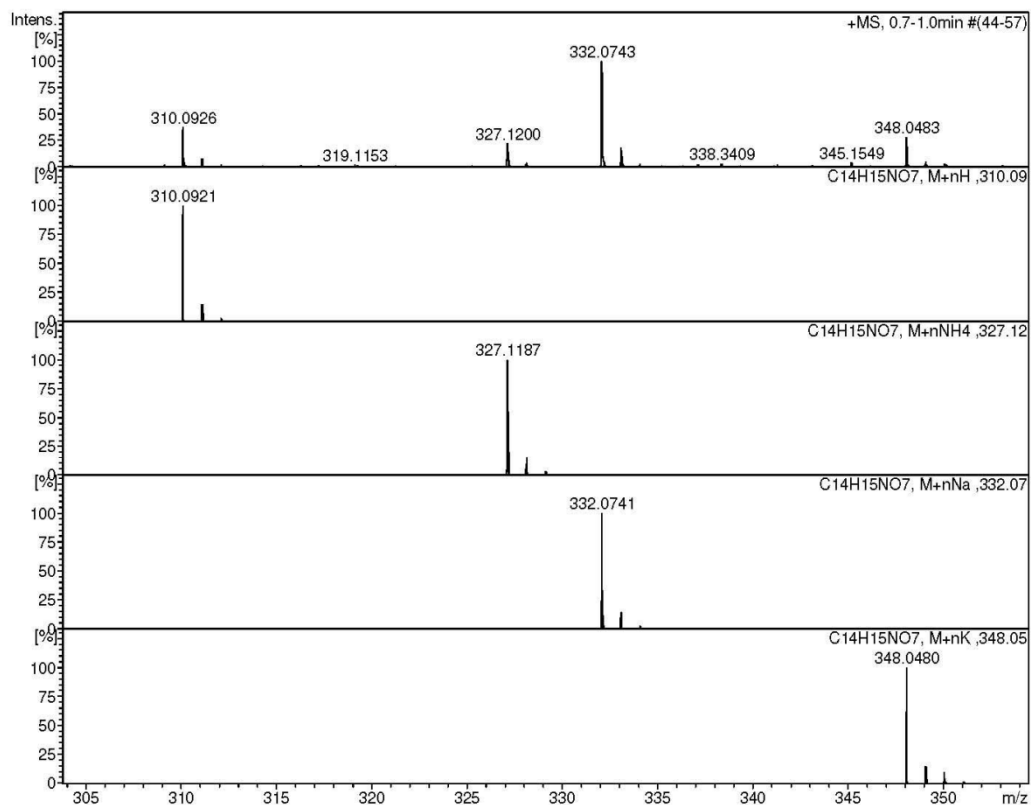

**<sup>1</sup>H NMR spectrum of compound 7d**

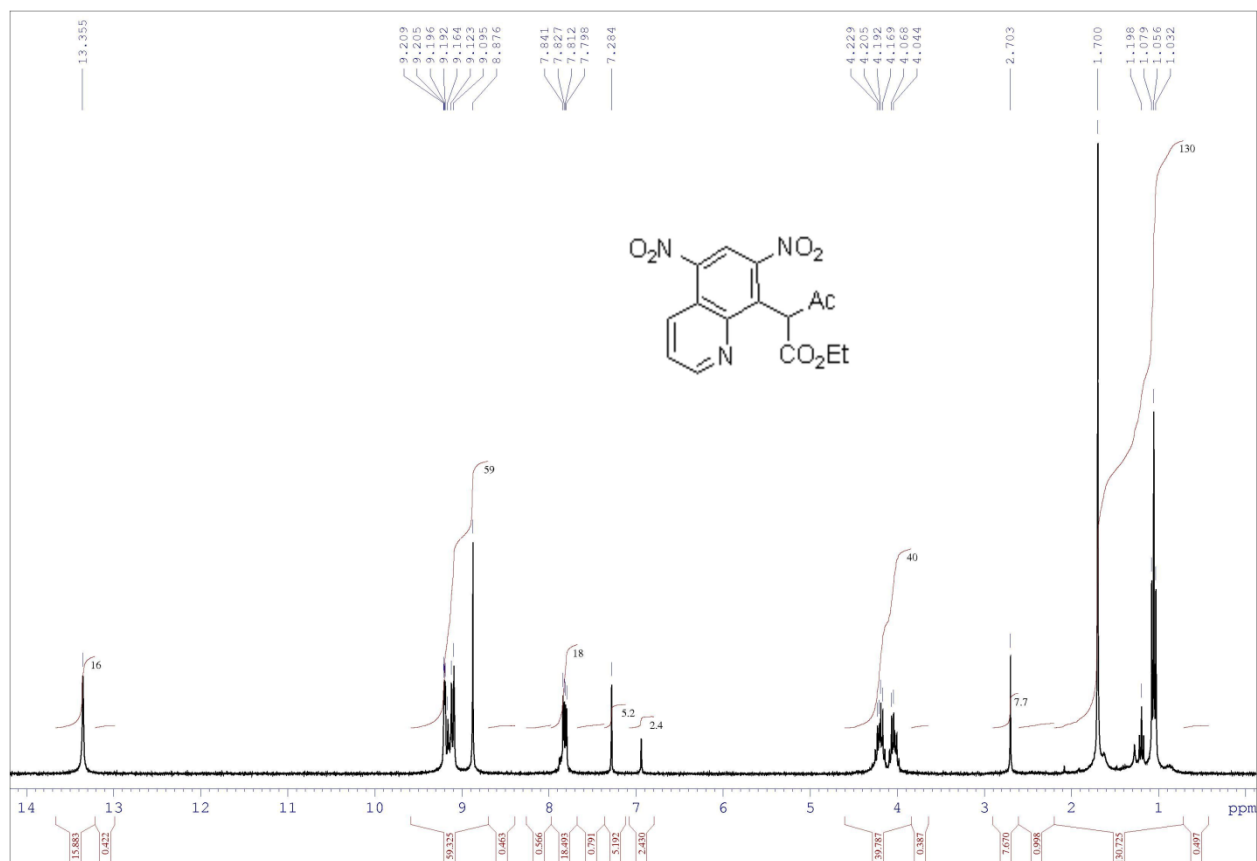

# HRMS spectrum of compound 7d

## Display Report

### Analysis Info

Analysis Name D:\Data\Kolotyrkina\2022\Bastrakov\1221005.d  
Method tune\_low.m  
Sample Name /LPIK YM-25  
Comment C15H13N3O7 mH 348.0826 calibrant added CH3CN

Acquisition Date 21.12.2022 10:00:22

Operator BDAL@DE  
Instrument / Ser# micrOTOF 10248

### Acquisition Parameter

|             |            |                      |          |                  |           |
|-------------|------------|----------------------|----------|------------------|-----------|
| Source Type | ESI        | Ion Polarity         | Positive | Set Nebulizer    | 0.4 Bar   |
| Focus       | Not active |                      |          | Set Dry Heater   | 180 °C    |
| Scan Begin  | 50 m/z     | Set Capillary        | 4500 V   | Set Dry Gas      | 4.0 l/min |
| Scan End    | 2500 m/z   | Set End Plate Offset | -500 V   | Set Divert Valve | Waste     |

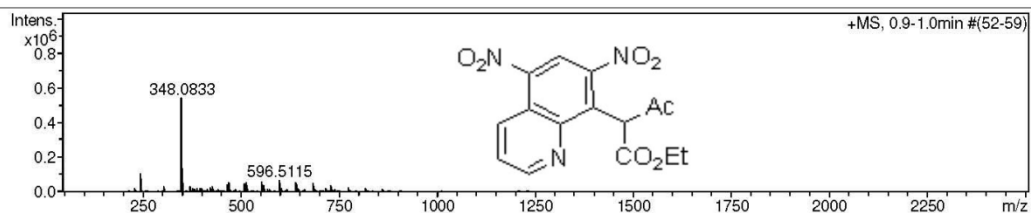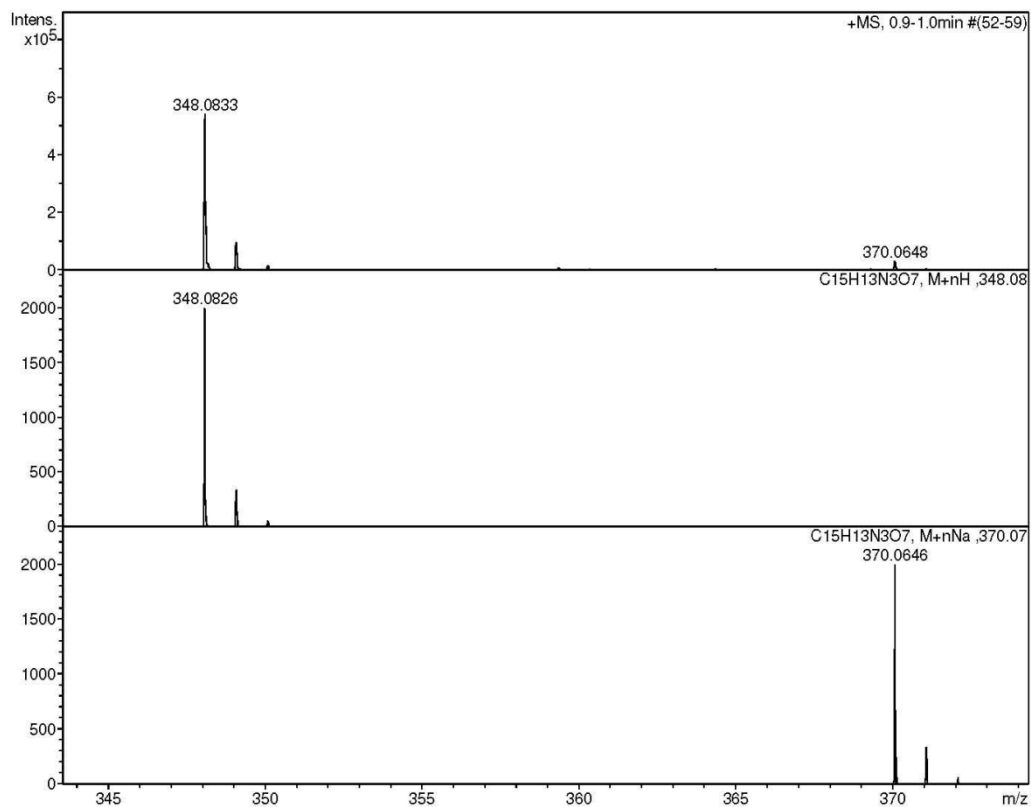

$^1\text{H}$  and  $^{13}\text{C}$  NMR spectra of compound **8a** in  $\text{CDCl}_3$

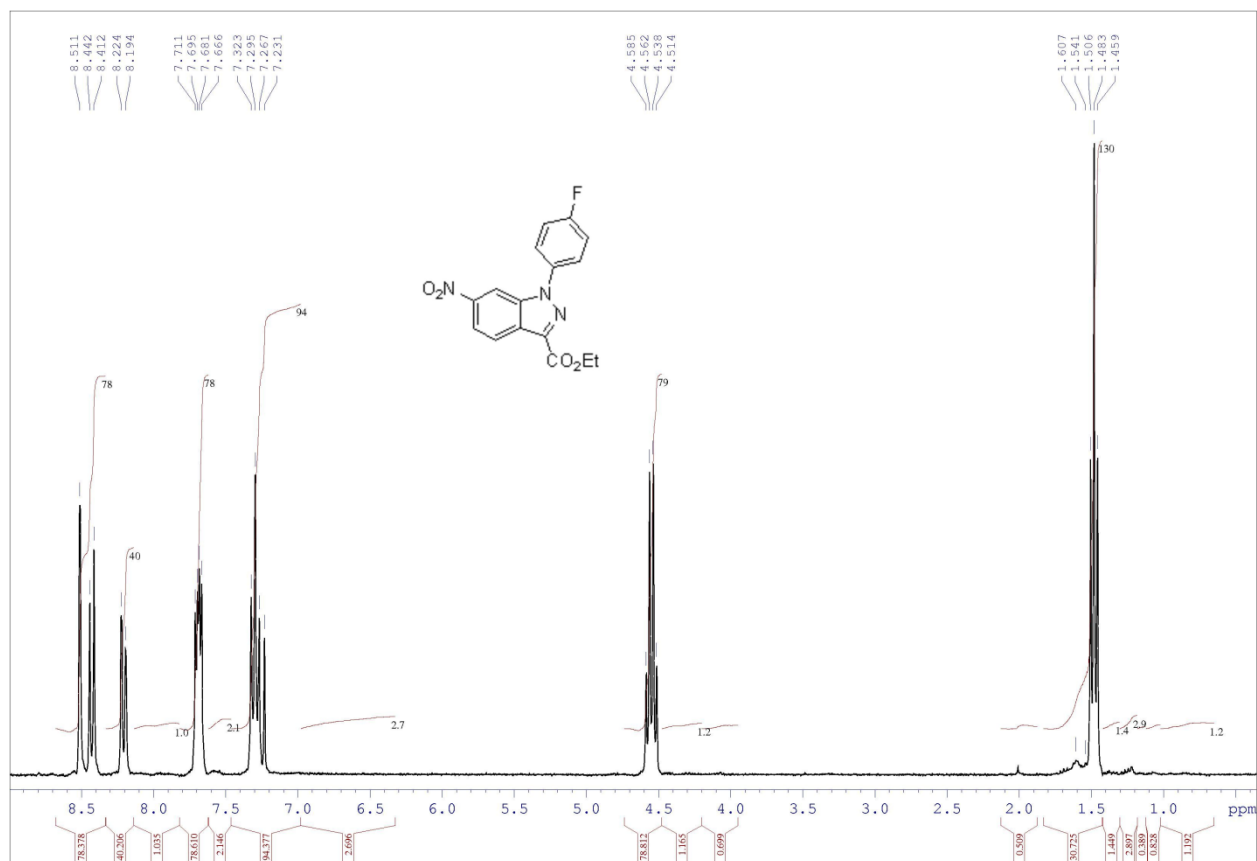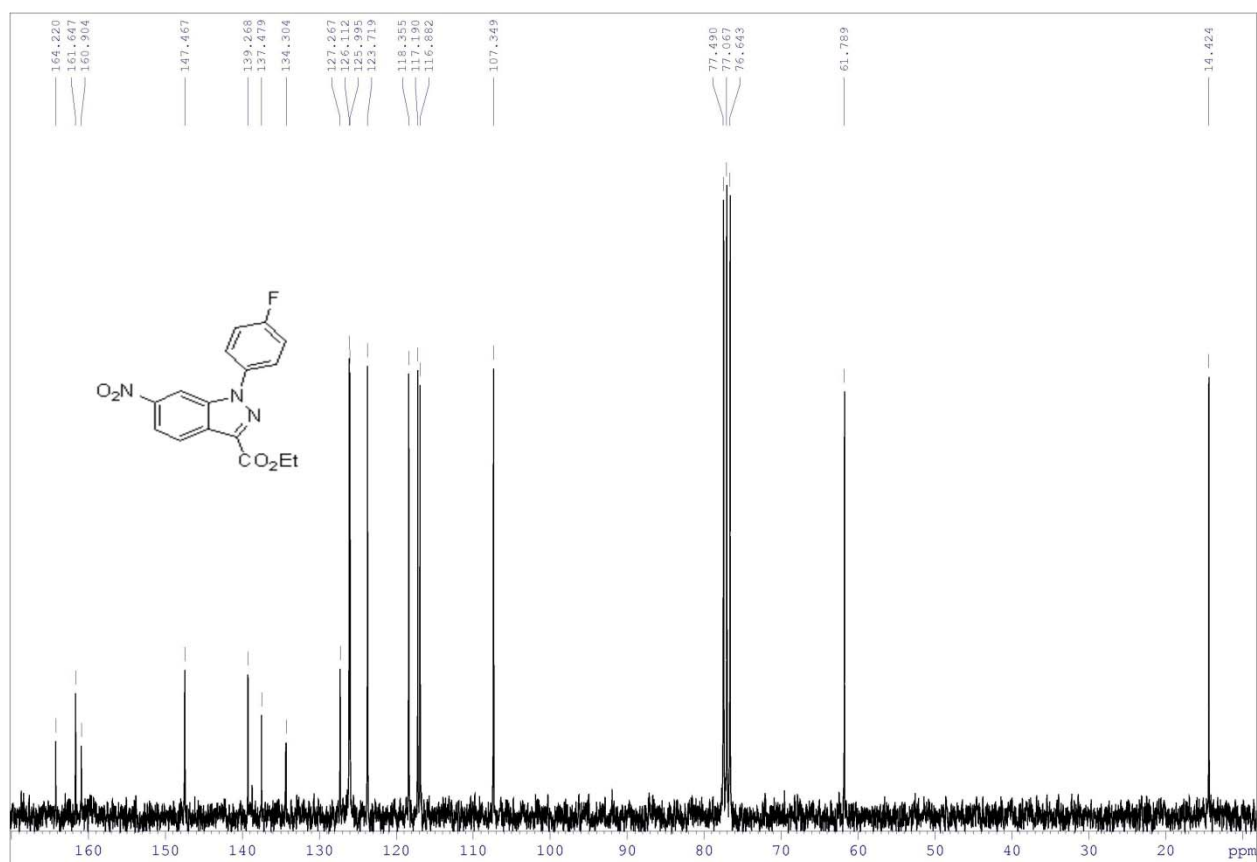

# HRMS spectrum of compound 8a

## Display Report

### Analysis Info

Analysis Name D:\Data\Kolotyrkina\2022\Bastrakov\0705022.d  
Method tune\_50-1600\_pos\_15\_12.m  
Sample Name /LPIK VN-572  
Comment C16H12FN3O4 mH 330.0884 calibrant added CH3CN

Acquisition Date 05.07.2022 15:23:31

Operator BDAL@DE  
Instrument / Ser# micrOTOF 10248

### Acquisition Parameter

|             |            |                      |          |                  |           |
|-------------|------------|----------------------|----------|------------------|-----------|
| Source Type | ESI        | Ion Polarity         | Positive | Set Nebulizer    | 0.4 Bar   |
| Focus       | Not active |                      |          | Set Dry Heater   | 180 °C    |
| Scan Begin  | 50 m/z     | Set Capillary        | 4500 V   | Set Dry Gas      | 4.0 l/min |
| Scan End    | 1600 m/z   | Set End Plate Offset | -500 V   | Set Divert Valve | Waste     |

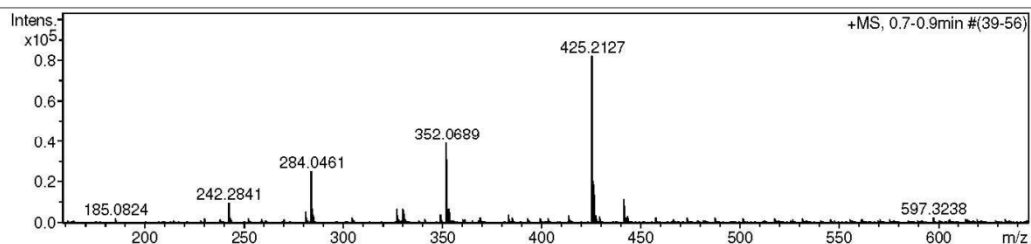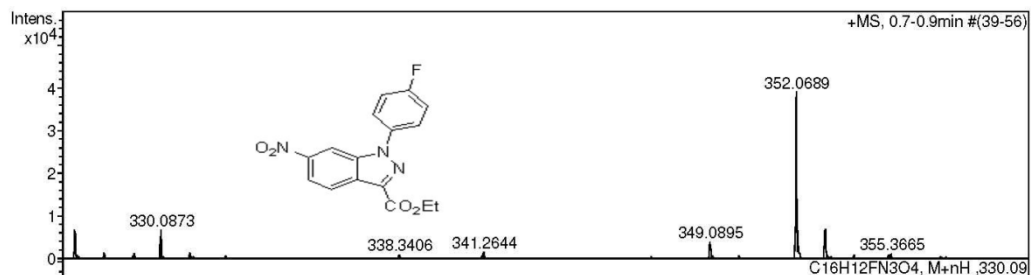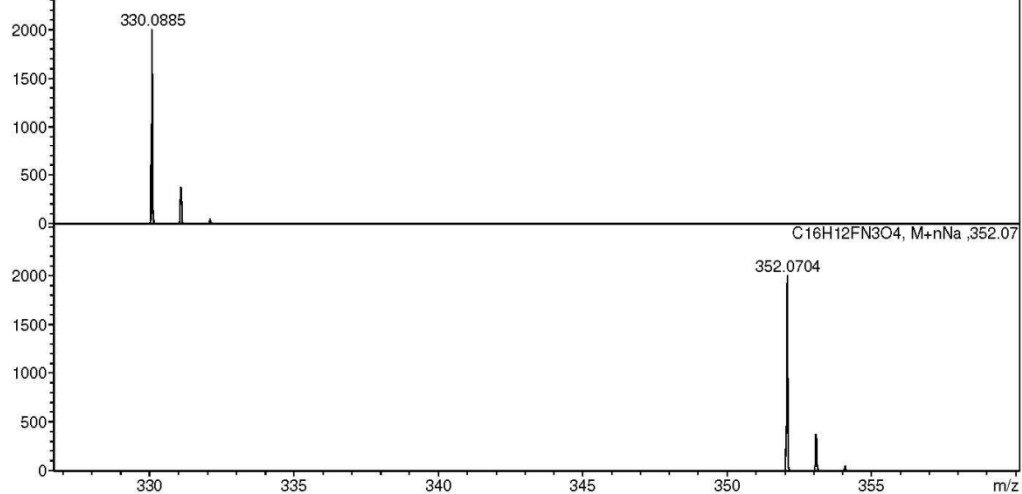

$^1\text{H}$  and  $^{13}\text{C}$  NMR spectra of compound **8b** in  $\text{CDCl}_3$

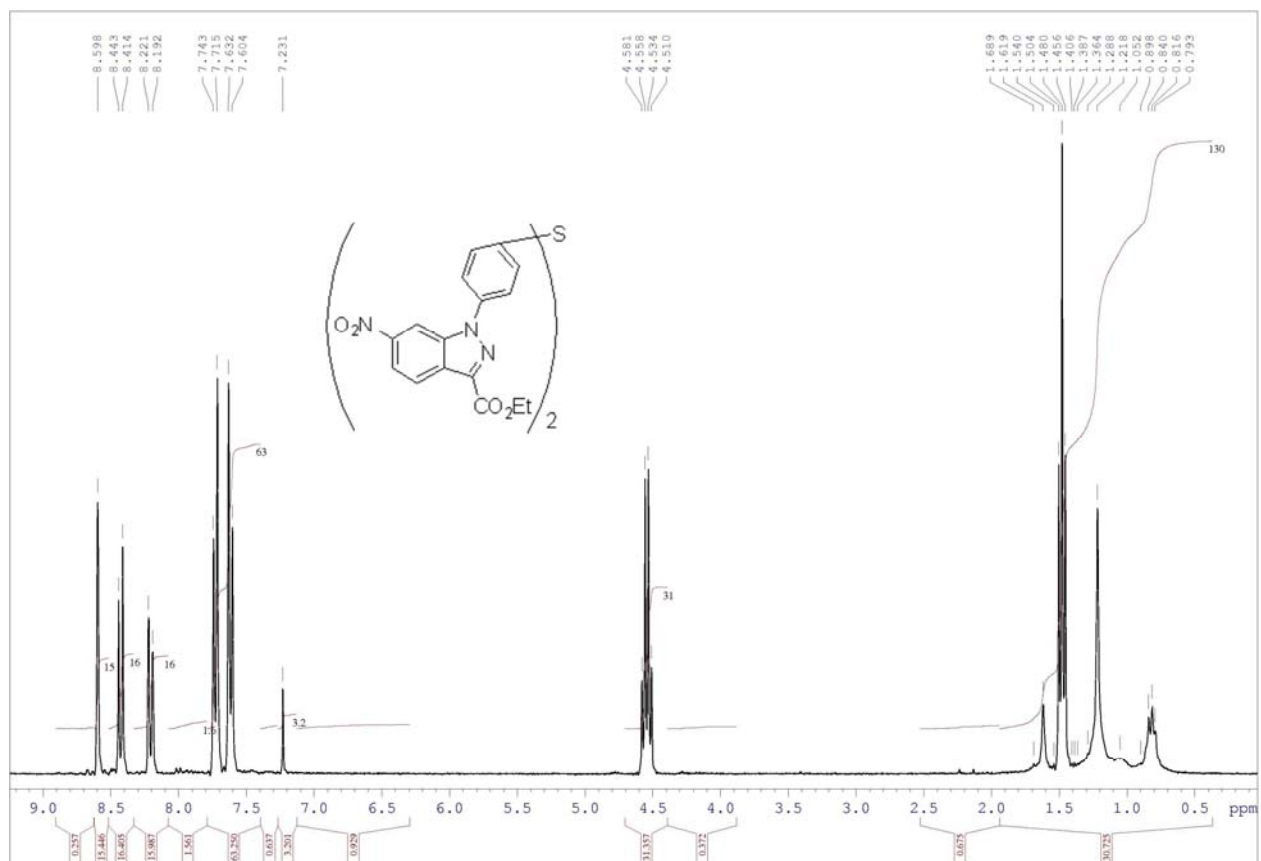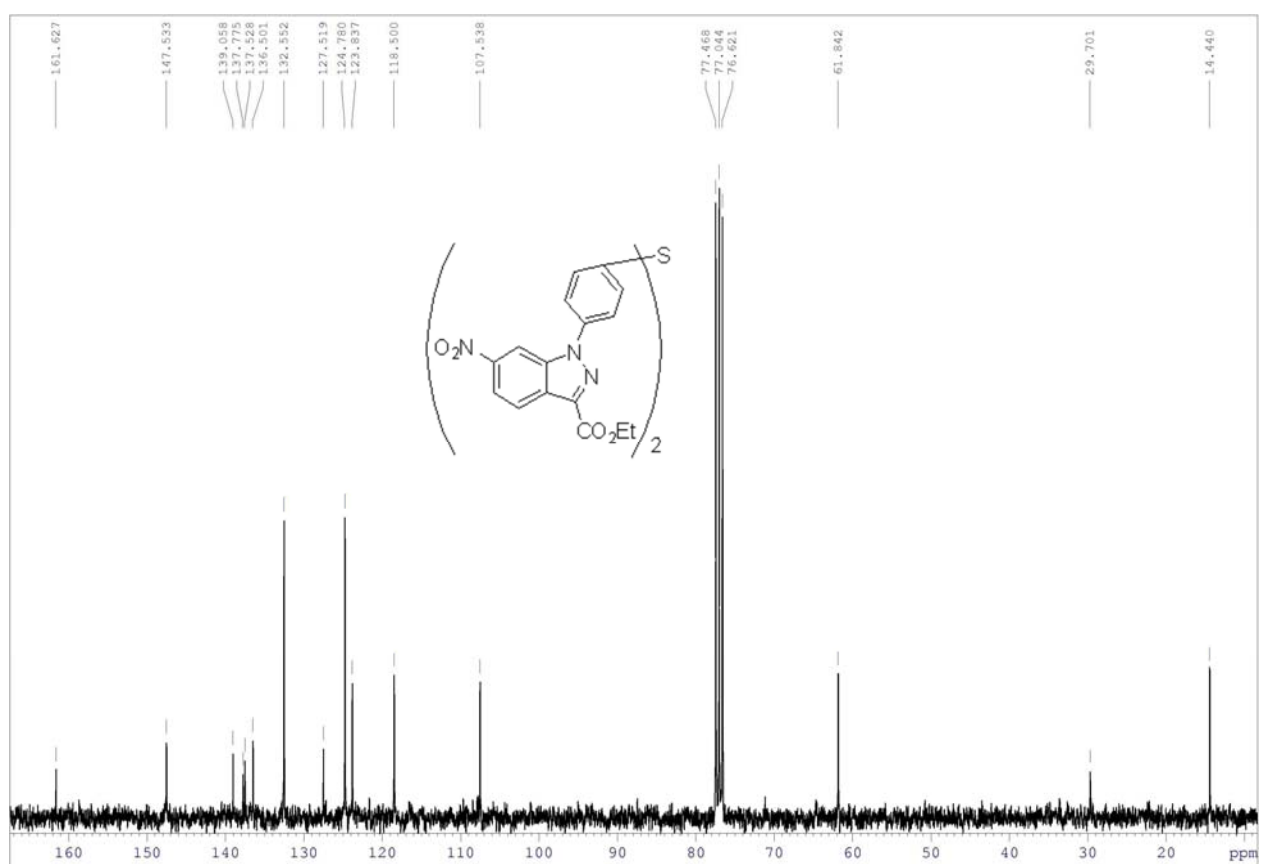



# HRMS spectrum of compound 8b

## Display Report

|                       |                                               |                      |          |                   |                     |
|-----------------------|-----------------------------------------------|----------------------|----------|-------------------|---------------------|
| Analysis Info         |                                               |                      |          | Acquisition Date  | 21.12.2022 10:30:08 |
| Analysis Name         | D:\Data\Kolotyrykina\2022\Bastrakov\1221011.d |                      |          | Operator          | BDAL@DE             |
| Method                | tune_low.m                                    |                      |          | Instrument / Ser# | micrOTOF 10248      |
| Sample Name           | /LPIK VN-584                                  |                      |          |                   |                     |
| Comment               | C32H24N6O8S mH 653.1449 calibrant added CH3CN |                      |          |                   |                     |
| Acquisition Parameter |                                               |                      |          |                   |                     |
| Source Type           | ESI                                           | Ion Polarity         | Positive | Set Nebulizer     | 0.4 Bar             |
| Focus                 | Not active                                    |                      |          | Set Dry Heater    | 180 °C              |
| Scan Begin            | 50 m/z                                        | Set Capillary        | 4500 V   | Set Dry Gas       | 4.0 l/min           |
| Scan End              | 2500 m/z                                      | Set End Plate Offset | -500 V   | Set Divert Valve  | Waste               |

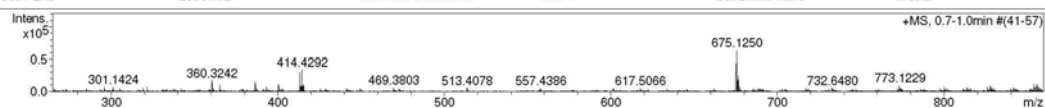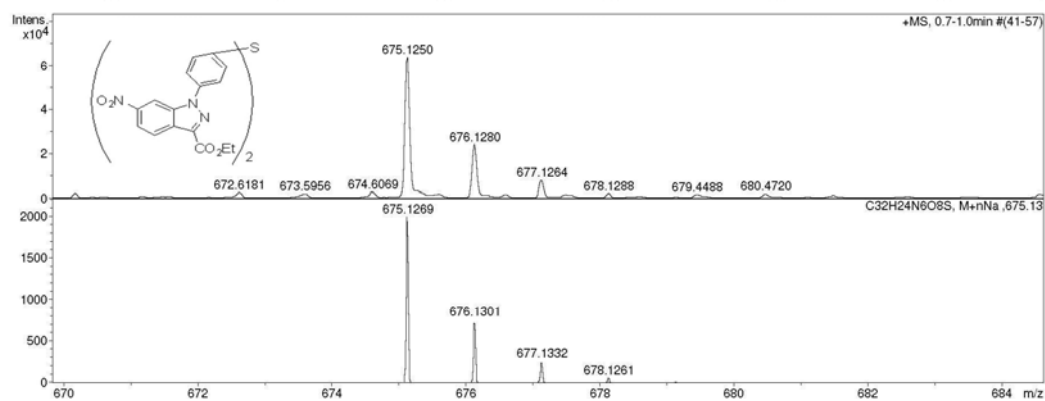

$^1\text{H}$  and  $^{13}\text{C}$  NMR spectra of compound **8c** in  $\text{CDCl}_3$

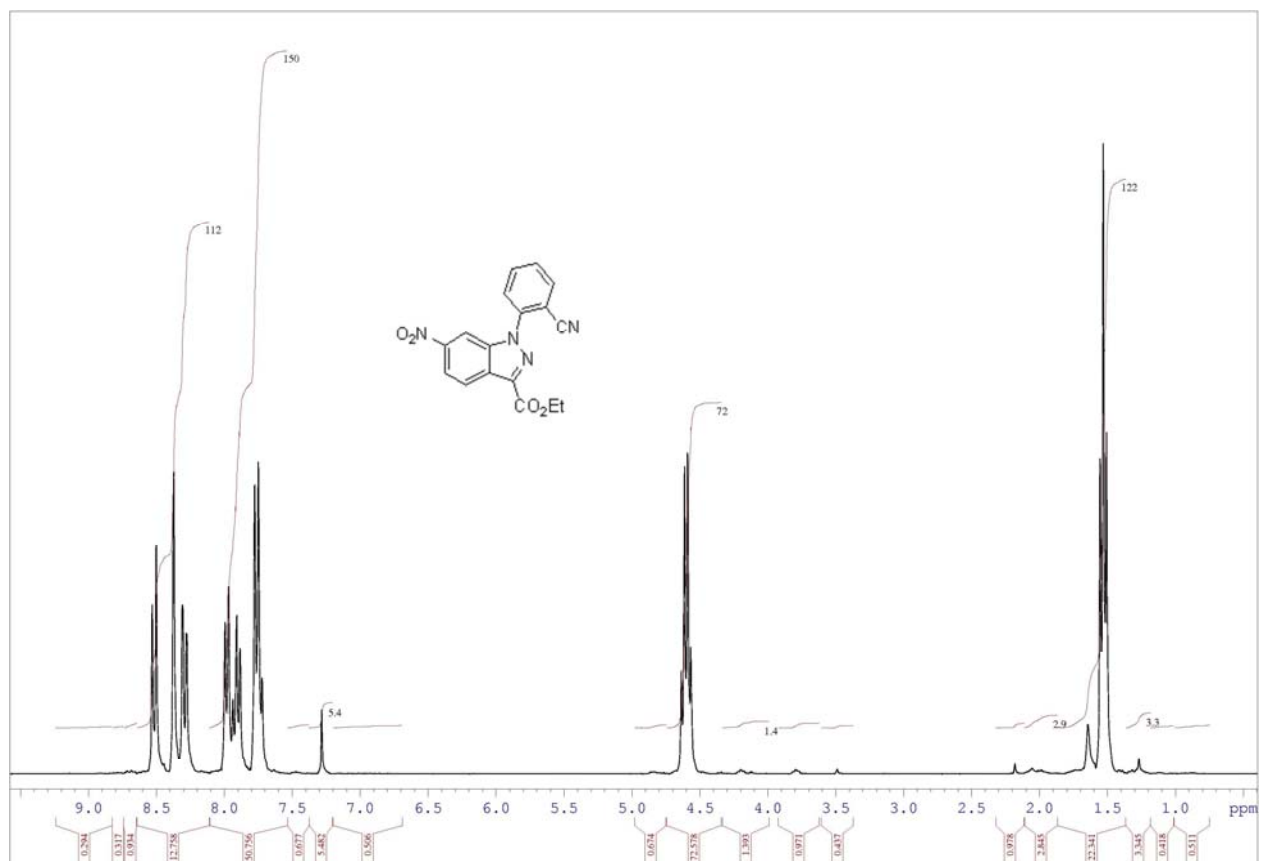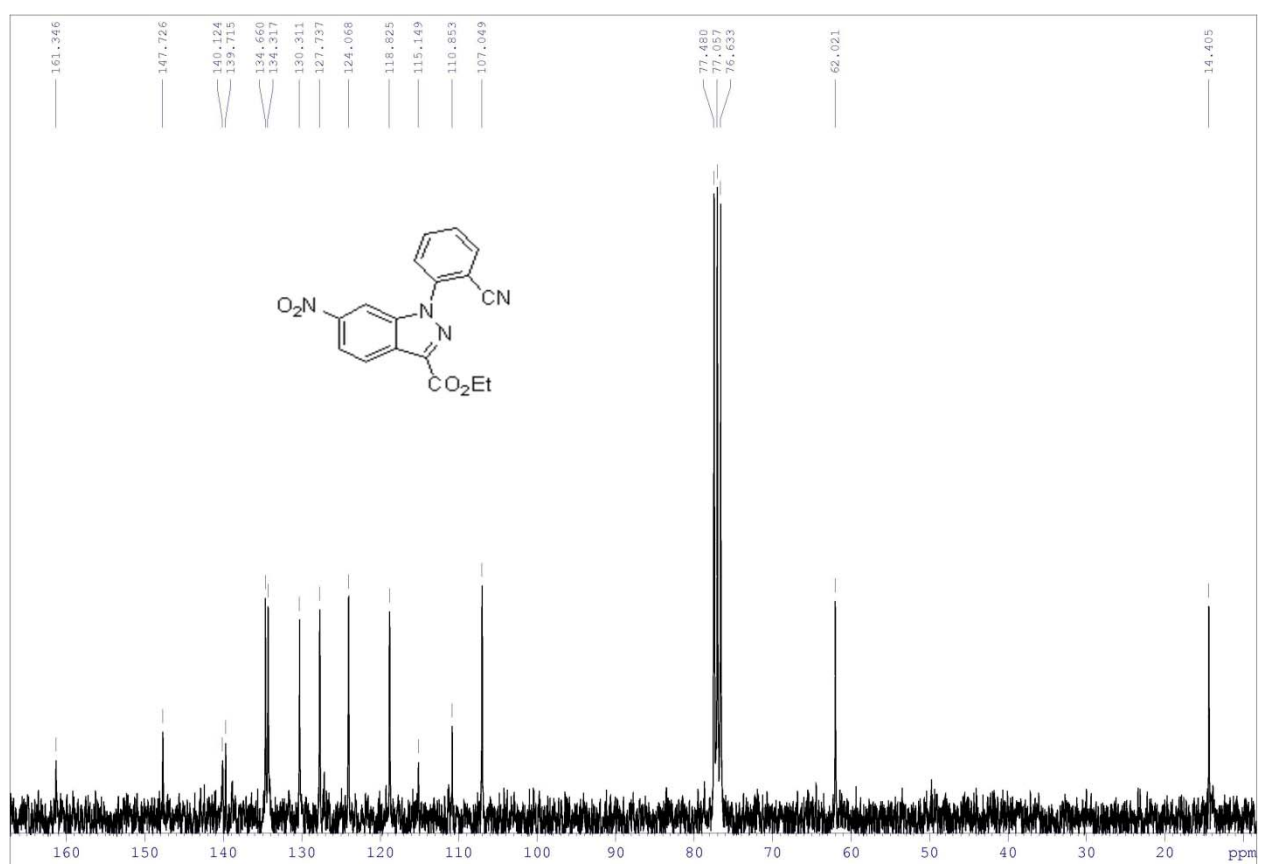

# HRMS spectrum of compound 8c

## Display Report

| Analysis Info |                                              | Acquisition Date  | 21.12.2022 10:40:15 |
|---------------|----------------------------------------------|-------------------|---------------------|
| Analysis Name | D:\Data\Kolotyrkina\2022\Bastrakov\1221012.d | Operator          | BDAL@DE             |
| Method        | tune_low.m                                   | Instrument / Ser# | micrOTOF 10248      |
| Sample Name   | /LPIK VN-805                                 |                   |                     |
| Comment       | C17H12N4O4 mH 337.0931 calibrant added CH3CN |                   |                     |

| Acquisition Parameter |            | Ion Polarity         | Positive | Set Nebulizer    | 0.4 Bar   |
|-----------------------|------------|----------------------|----------|------------------|-----------|
| Source Type           | ESI        |                      |          | Set Dry Heater   | 180 °C    |
| Focus                 | Not active | Set Capillary        | 4500 V   | Set Dry Gas      | 4.0 l/min |
| Scan Begin            | 50 m/z     | Set End Plate Offset | -500 V   | Set Divert Valve | Waste     |
| Scan End              | 2500 m/z   |                      |          |                  |           |

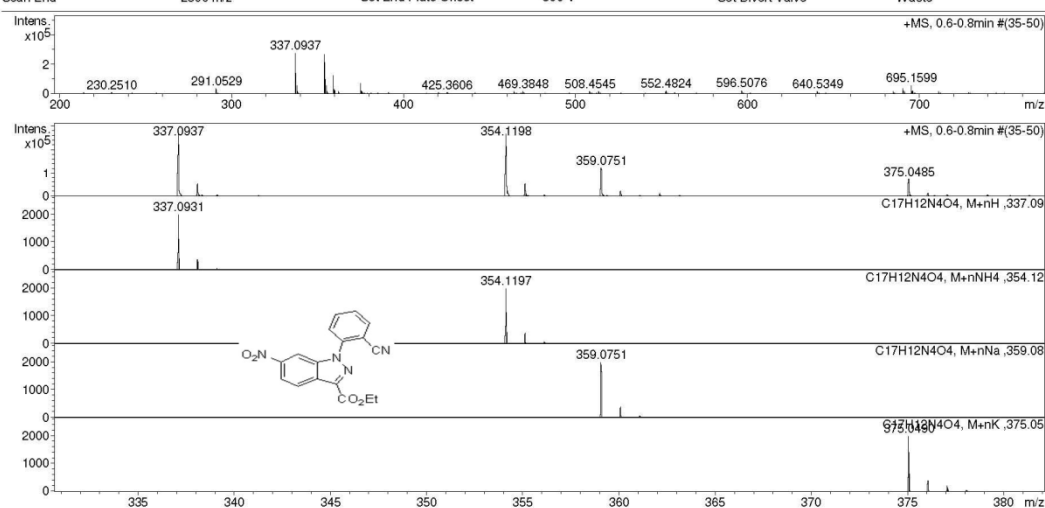

$^1\text{H}$  and spectrum of compound **8d** in  $\text{DMSO-d}_6$

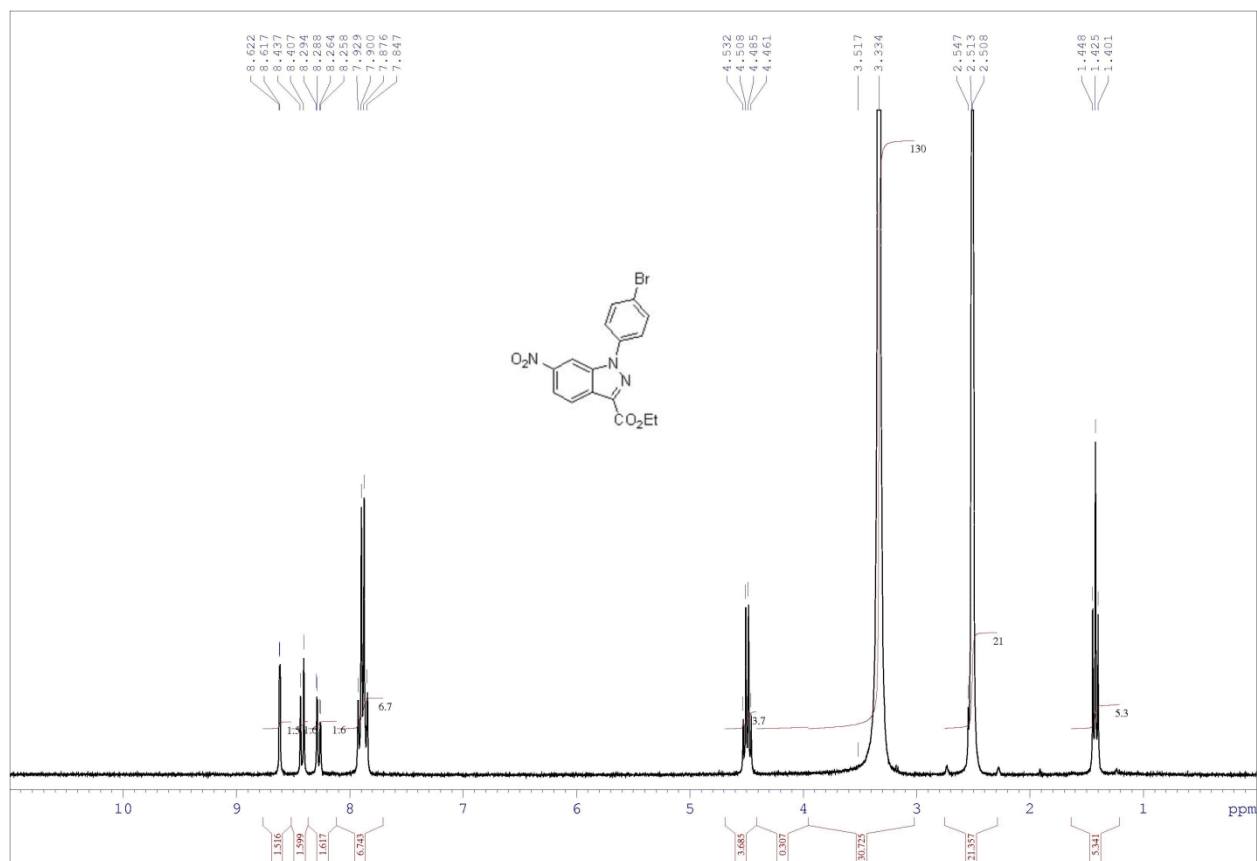

# HRMS spectrum of compound 8d

## Display Report

|               |                                                |                  |                     |                |
|---------------|------------------------------------------------|------------------|---------------------|----------------|
| Analysis Info |                                                | Acquisition Date | 21.12.2022 10:45:15 |                |
| Analysis Name | D:\Data\Kolotyrkina\2022\Bastrakov\1221013.d   |                  | Operator            | BDAL@DE        |
| Method        | tune_low.m                                     |                  | Instrument / Ser#   | micrOTOF 10248 |
| Sample Name   | /LPIK YM-24                                    |                  |                     |                |
| Comment       | C16H12BrN3O4 mH 390.0083 calibrant added CH3CN |                  |                     |                |

|                              |            |                      |          |                  |           |
|------------------------------|------------|----------------------|----------|------------------|-----------|
| <b>Acquisition Parameter</b> |            | Ion Polarity         | Positive | Set Nebulizer    | 0.4 Bar   |
| Source Type                  | ESI        | Set Capillary        | 4500 V   | Set Dry Heater   | 180 °C    |
| Focus                        | Not active | Set End Plate Offset | -500 V   | Set Dry Gas      | 4.0 l/min |
| Scan Begin                   | 50 m/z     |                      |          | Set Divert Valve | Waste     |
| Scan End                     | 2500 m/z   |                      |          |                  |           |

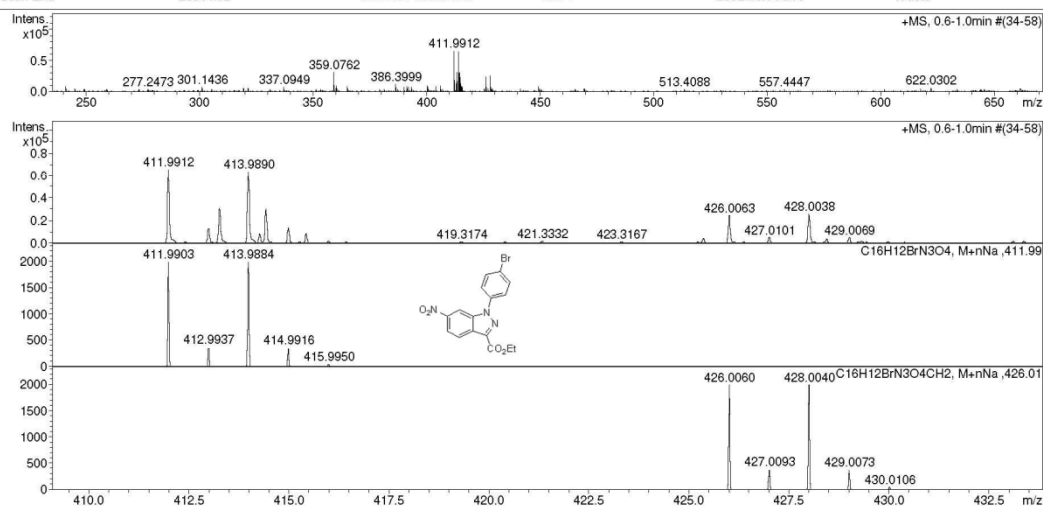

$^1\text{H}$  and  $^{13}\text{C}$  NMR spectra of compound **8e** in  $\text{CDCl}_3$

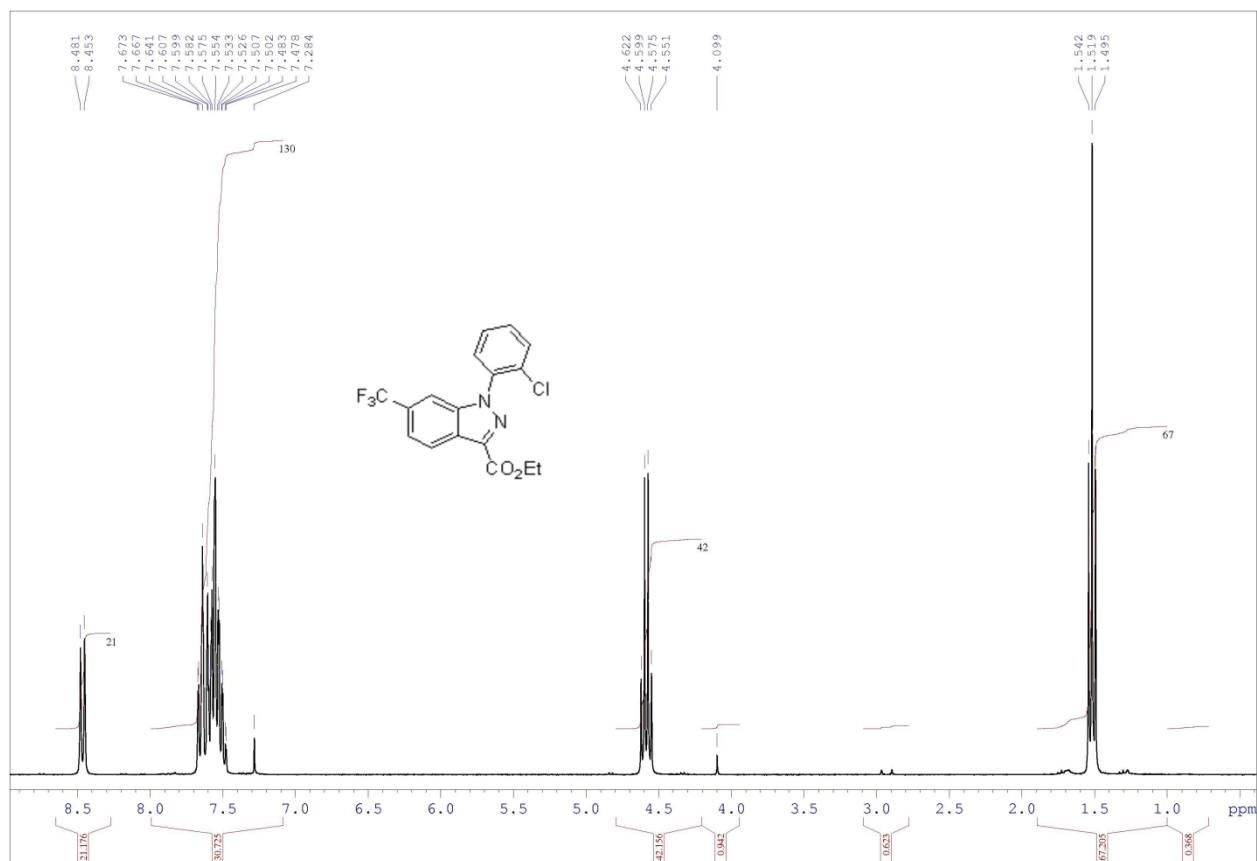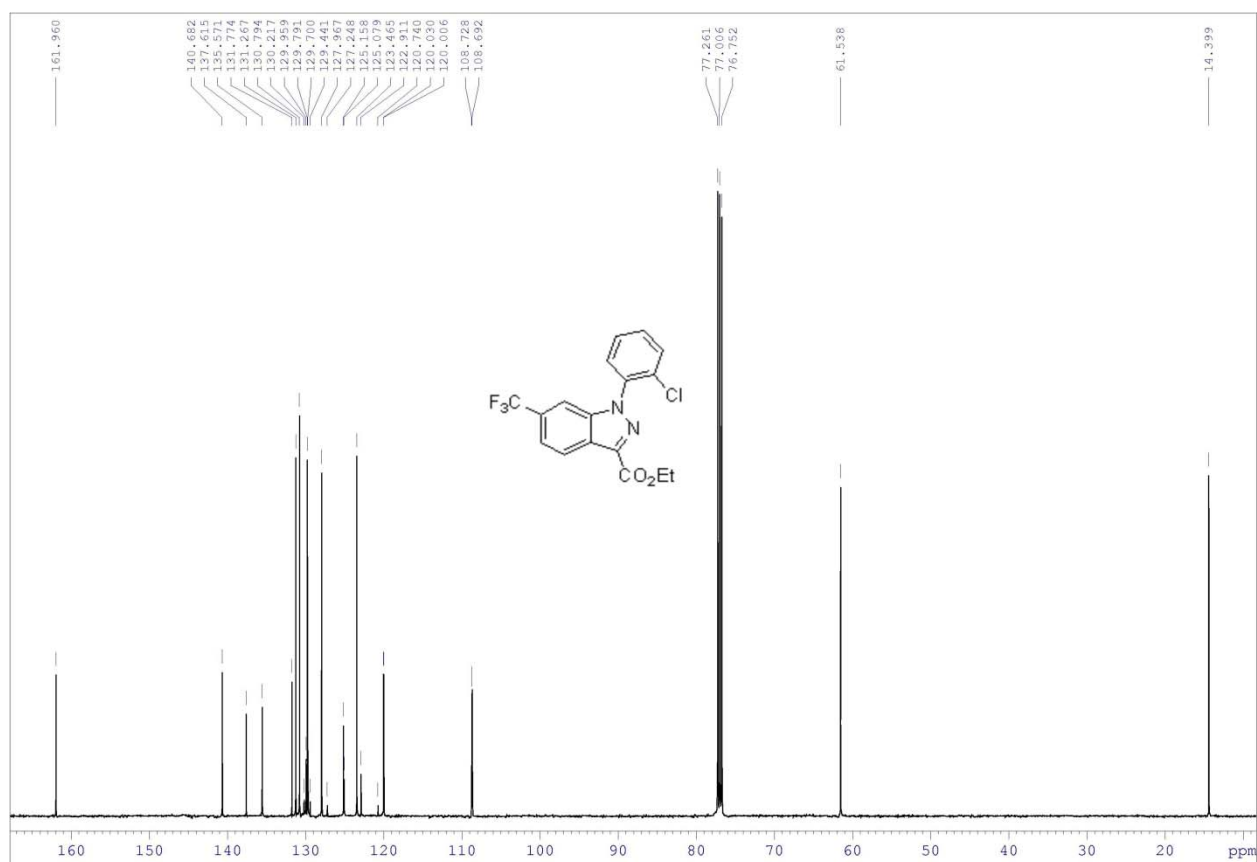

# HRMS spectrum of compound 8e

## Display Report

### Analysis Info

Analysis Name D:\Data\Kolotyrkina\2022\Bastrakov\1221030.d  
Method tune\_low.m  
Sample Name /LPIK VN-617  
Comment C17H12ClF3N2O2 mH 369.0612 calibrant added CH3CN

Acquisition Date 21.12.2022 14:49:14

Operator BDAL@DE  
Instrument / Ser# micrOTOF 10248

### Acquisition Parameter

|             |            |                      |          |                  |           |
|-------------|------------|----------------------|----------|------------------|-----------|
| Source Type | ESI        | Ion Polarity         | Positive | Set Nebulizer    | 0.4 Bar   |
| Focus       | Not active |                      |          | Set Dry Heater   | 180 °C    |
| Scan Begin  | 50 m/z     | Set Capillary        | 4500 V   | Set Dry Gas      | 4.0 l/min |
| Scan End    | 2500 m/z   | Set End Plate Offset | -500 V   | Set Divert Valve | Waste     |

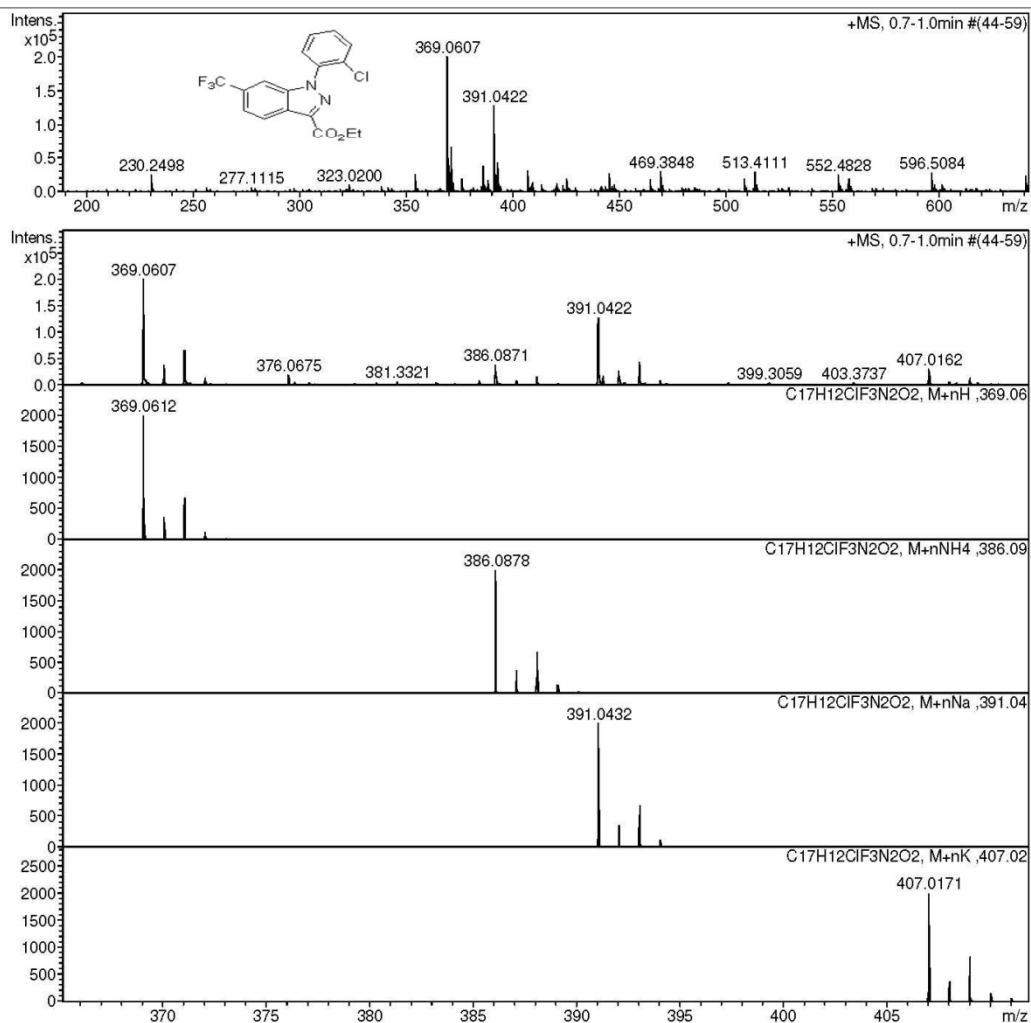

$^1\text{H}$  and  $^{13}\text{C}$  NMR spectra of compound **8f** in  $\text{CDCl}_3$

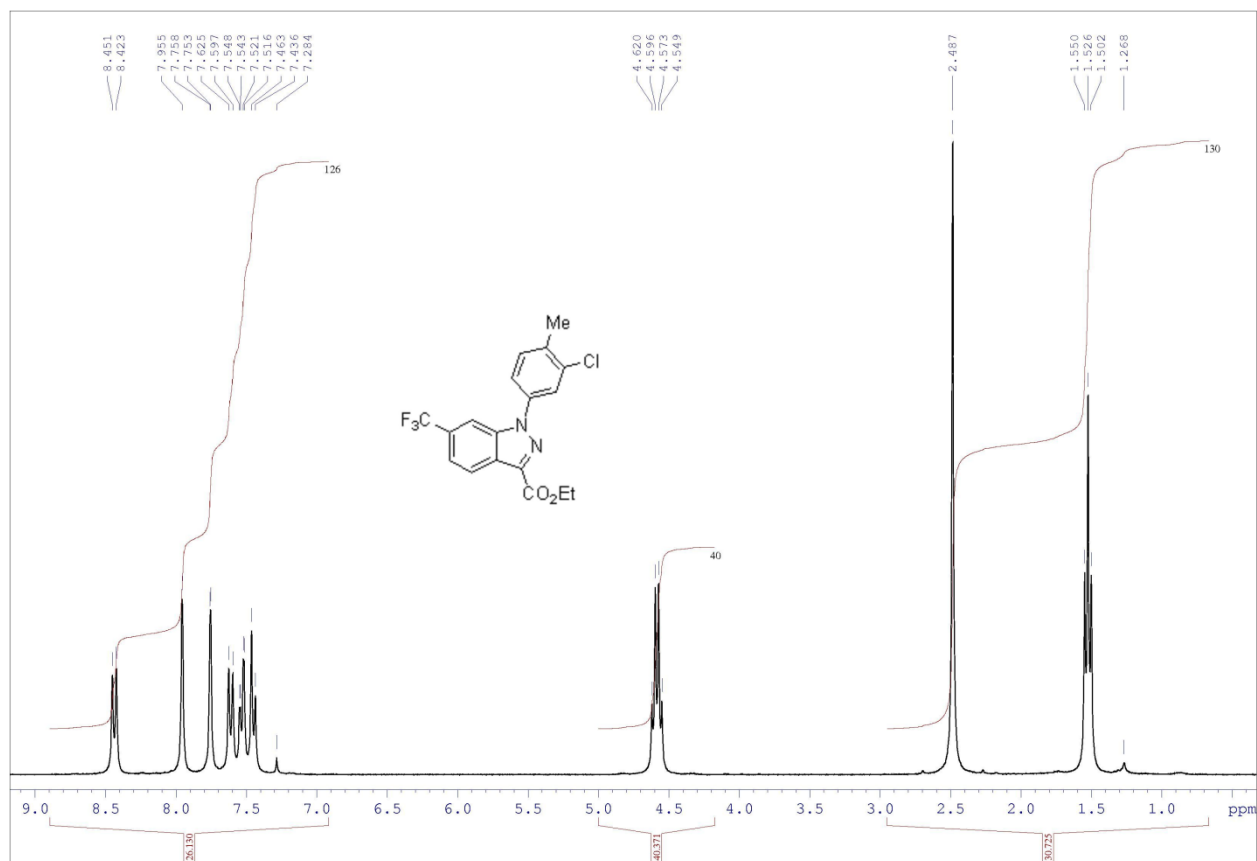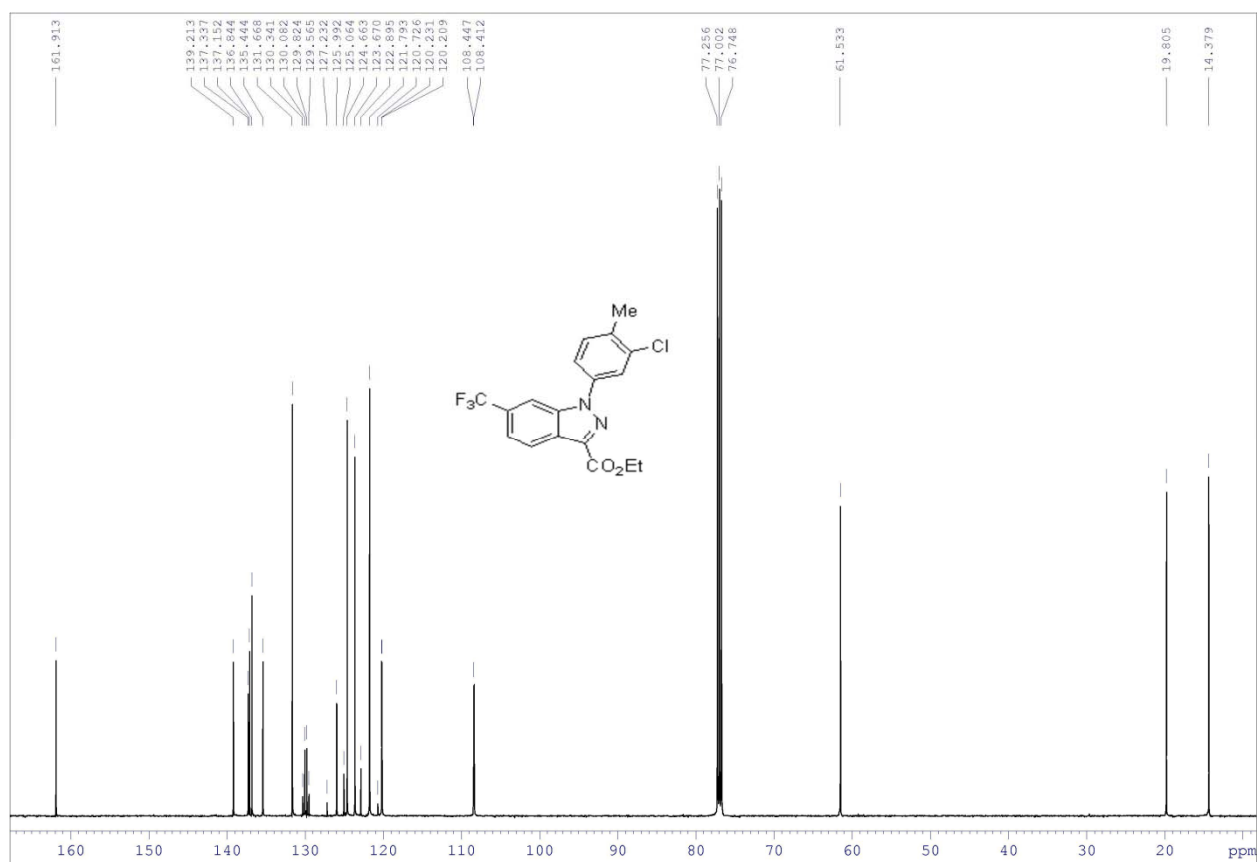



# HRMS spectrum of compound 8f

## Display Report

### Analysis Info

Analysis Name D:\Data\Kolotyrkina\2022\Bastrakov\1221031.d  
Method tune\_low.m  
Sample Name /LPIK YM-18  
Comment C18H14ClF3N2O2 mH 383.0768 calibrant added CH3CN

Acquisition Date 21.12.2022 14:53:49

Operator BDAL@DE  
Instrument / Ser# micrOTOF 10248

### Acquisition Parameter

|             |            |                      |          |                  |           |
|-------------|------------|----------------------|----------|------------------|-----------|
| Source Type | ESI        | Ion Polarity         | Positive | Set Nebulizer    | 0.4 Bar   |
| Focus       | Not active |                      |          | Set Dry Heater   | 180 °C    |
| Scan Begin  | 50 m/z     | Set Capillary        | 4500 V   | Set Dry Gas      | 4.0 l/min |
| Scan End    | 2500 m/z   | Set End Plate Offset | -500 V   | Set Divert Valve | Waste     |

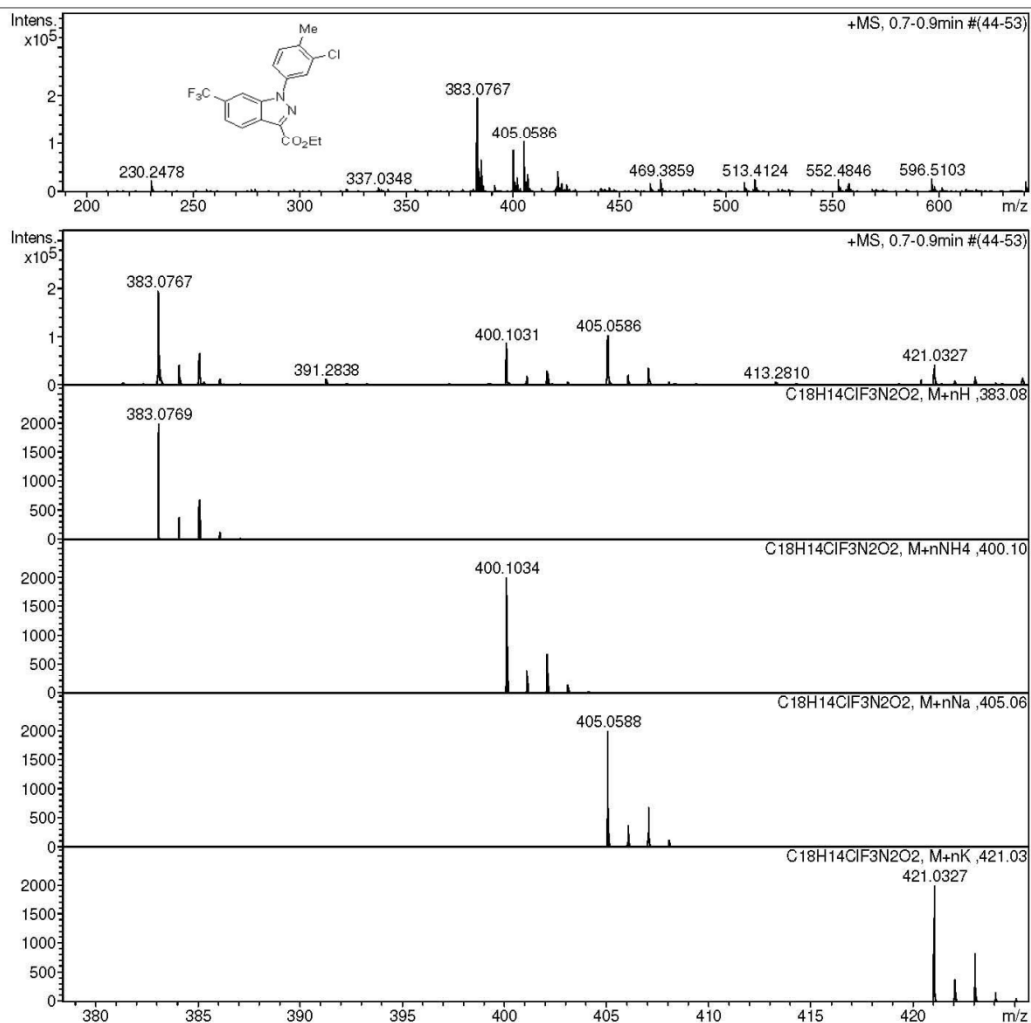

$^1\text{H}$  and  $^{13}\text{C}$  NMR spectra of compound **8g** in  $\text{CDCl}_3$

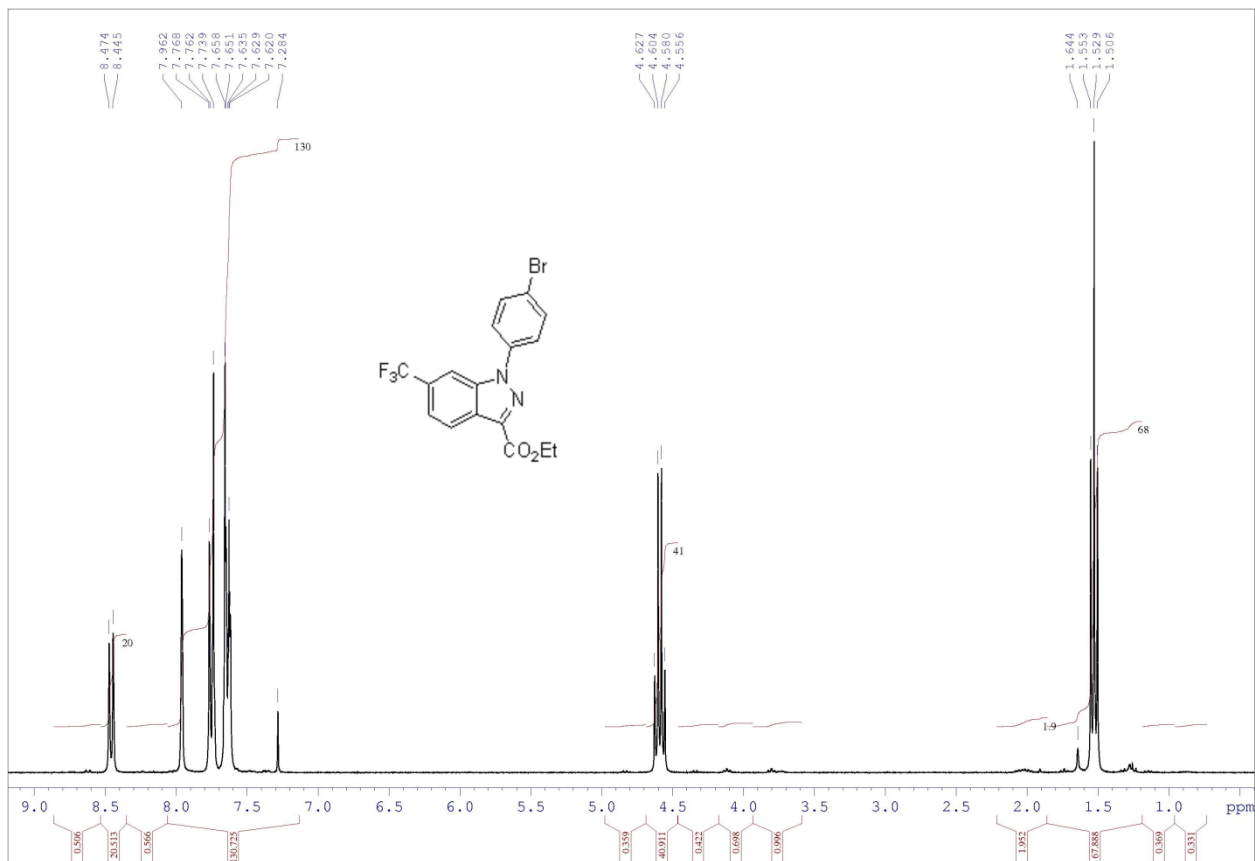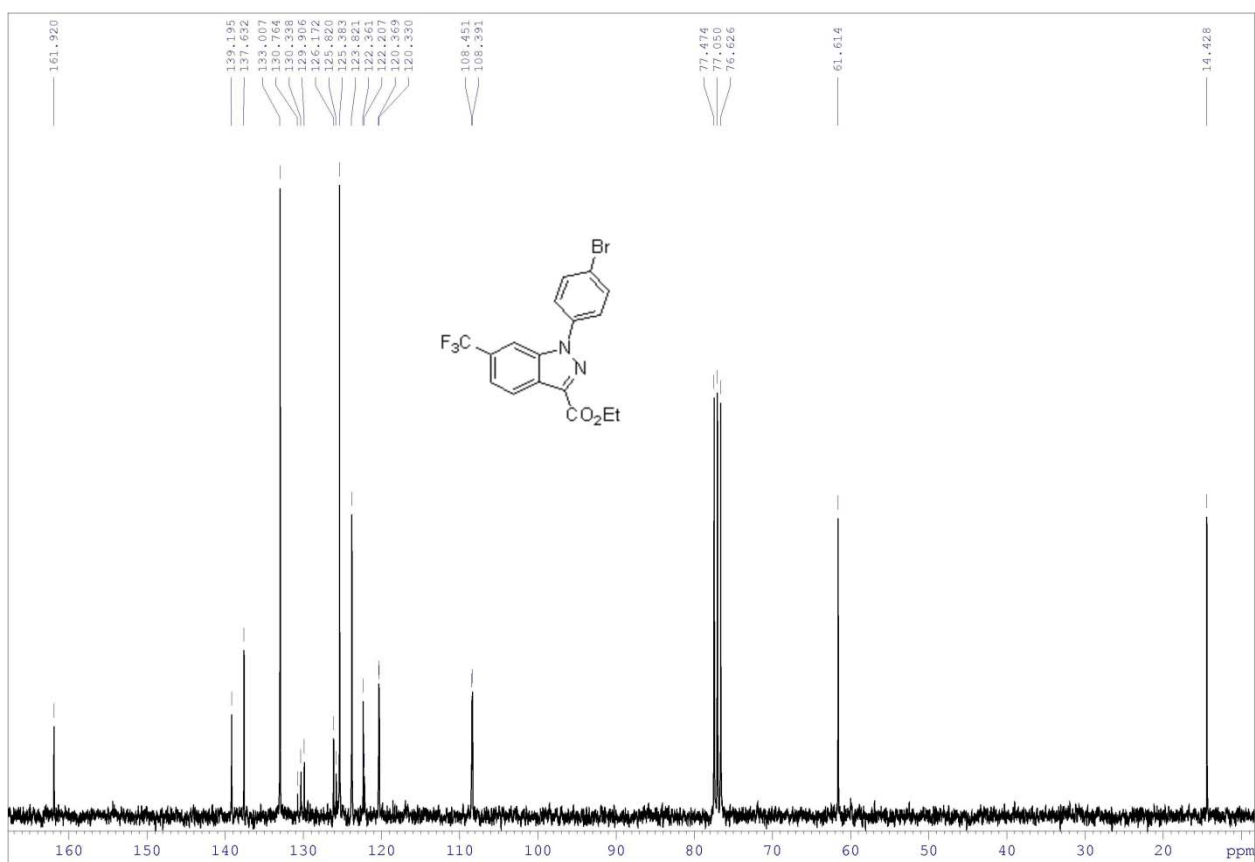

# HRMS spectrum of compound 8g

## Display Report

|               |                                                  |                   |                     |  |
|---------------|--------------------------------------------------|-------------------|---------------------|--|
| Analysis Info |                                                  | Acquisition Date  | 21.12.2022 14:58:24 |  |
| Analysis Name | D:\Data\Kolotyarkina\2022\Bastrakov\1221032.d    | Operator          | BDAL@DE             |  |
| Method        | tune_low.m                                       | Instrument / Ser# | micrOTOF 10248      |  |
| Sample Name   | /LPIK VN-642                                     |                   |                     |  |
| Comment       | C17H12BrF3N2O2 mH 413.0107 calibrant added CH3CN |                   |                     |  |

|                              |            |                      |          |                  |           |
|------------------------------|------------|----------------------|----------|------------------|-----------|
| <b>Acquisition Parameter</b> |            |                      |          |                  |           |
| Source Type                  | ESI        | Ion Polarity         | Positive | Set Nebulizer    | 0.4 Bar   |
| Focus                        | Not active |                      |          | Set Dry Heater   | 180 °C    |
| Scan Begin                   | 50 m/z     | Set Capillary        | 4500 V   | Set Dry Gas      | 4.0 l/min |
| Scan End                     | 2500 m/z   | Set End Plate Offset | -500 V   | Set Divert Valve | Waste     |

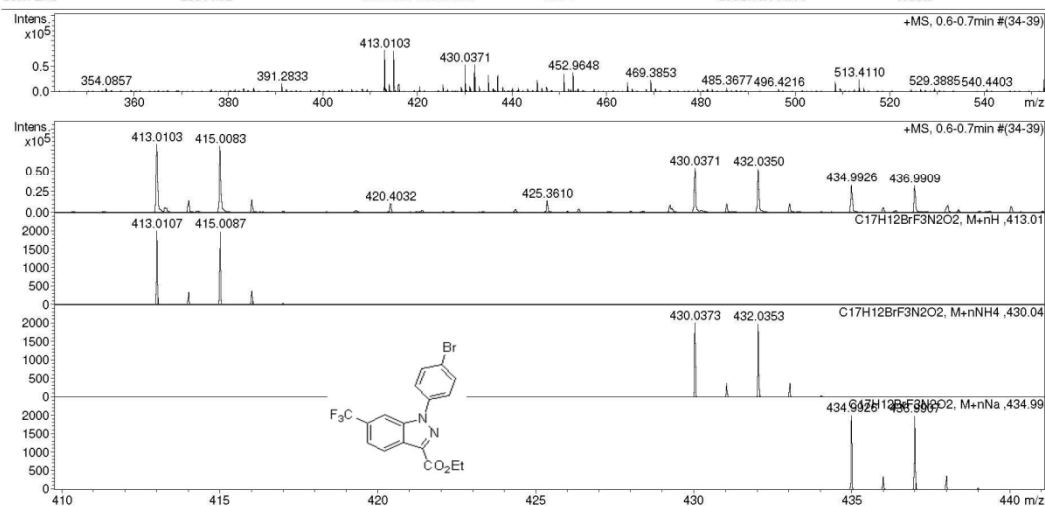

$^1\text{H}$  and  $^{13}\text{C}$  NMR spectra of compound **8h** in  $\text{CDCl}_3$

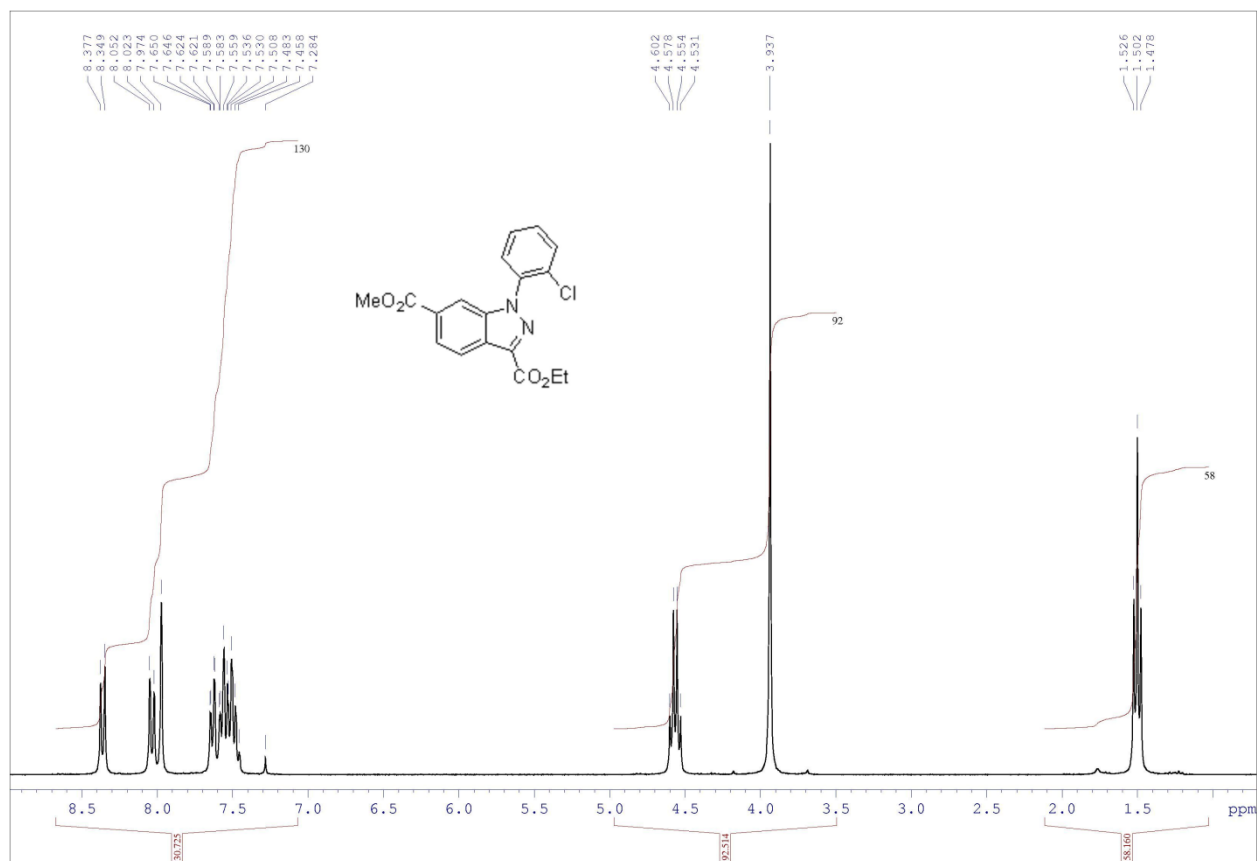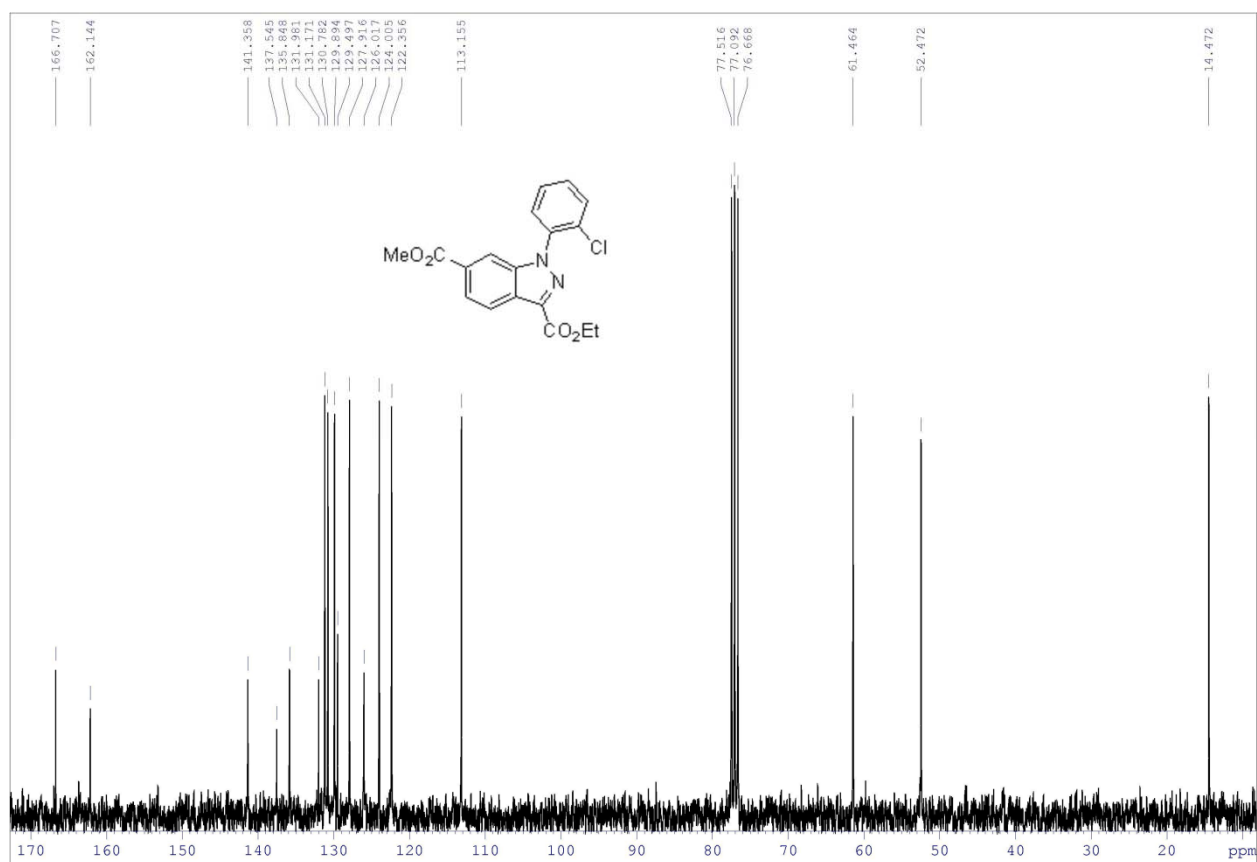

# HRMS spectrum of compound 8h

## Display Report

| Analysis Info |                                                | Acquisition Date  | 21.12.2022 15:20:24 |
|---------------|------------------------------------------------|-------------------|---------------------|
| Analysis Name | D:\Data\Kolotyarkina\2022\Bastrakov\1221035.d  | Operator          | BDAL@DE             |
| Method        | tune_low.m                                     | Instrument / Ser# | micrOTOF 10248      |
| Sample Name   | /LPIK YM-21                                    |                   |                     |
| Comment       | C18H15ClN2O4 mH 359.0793 calibrant added CH3CN |                   |                     |

| Acquisition Parameter |            | Ion Polarity         | Positive | Set Nebulizer    | 0.4 Bar   |
|-----------------------|------------|----------------------|----------|------------------|-----------|
| Source Type           | ESI        |                      |          | Set Dry Heater   | 180 °C    |
| Focus                 | Not active |                      |          | Set Dry Gas      | 4.0 l/min |
| Scan Begin            | 50 m/z     | Set Capillary        | 4500 V   | Set Divert Valve | Waste     |
| Scan End              | 2500 m/z   | Set End Plate Offset | -500 V   |                  |           |

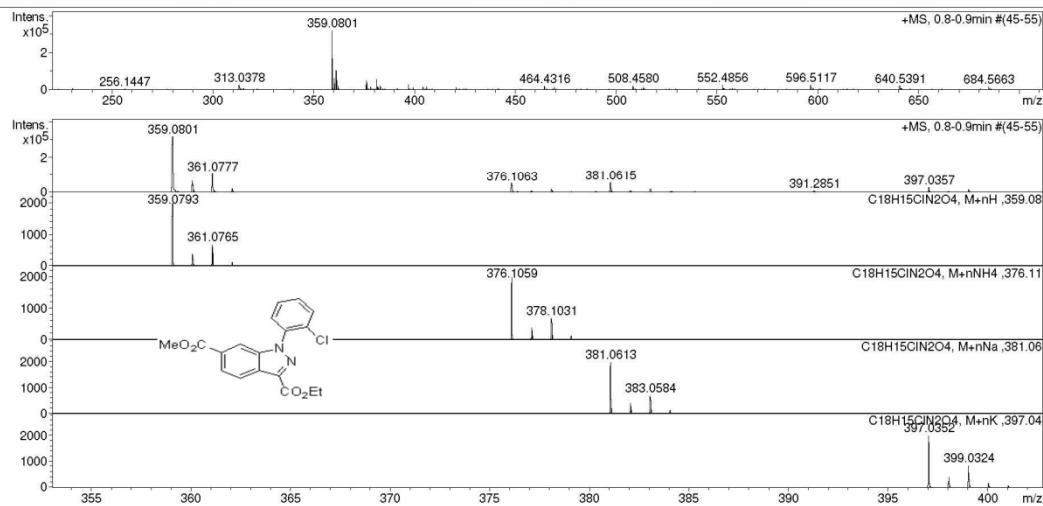

$^1\text{H}$  and  $^{13}\text{C}$  NMR spectra of compound **8i** in  $\text{CDCl}_3$

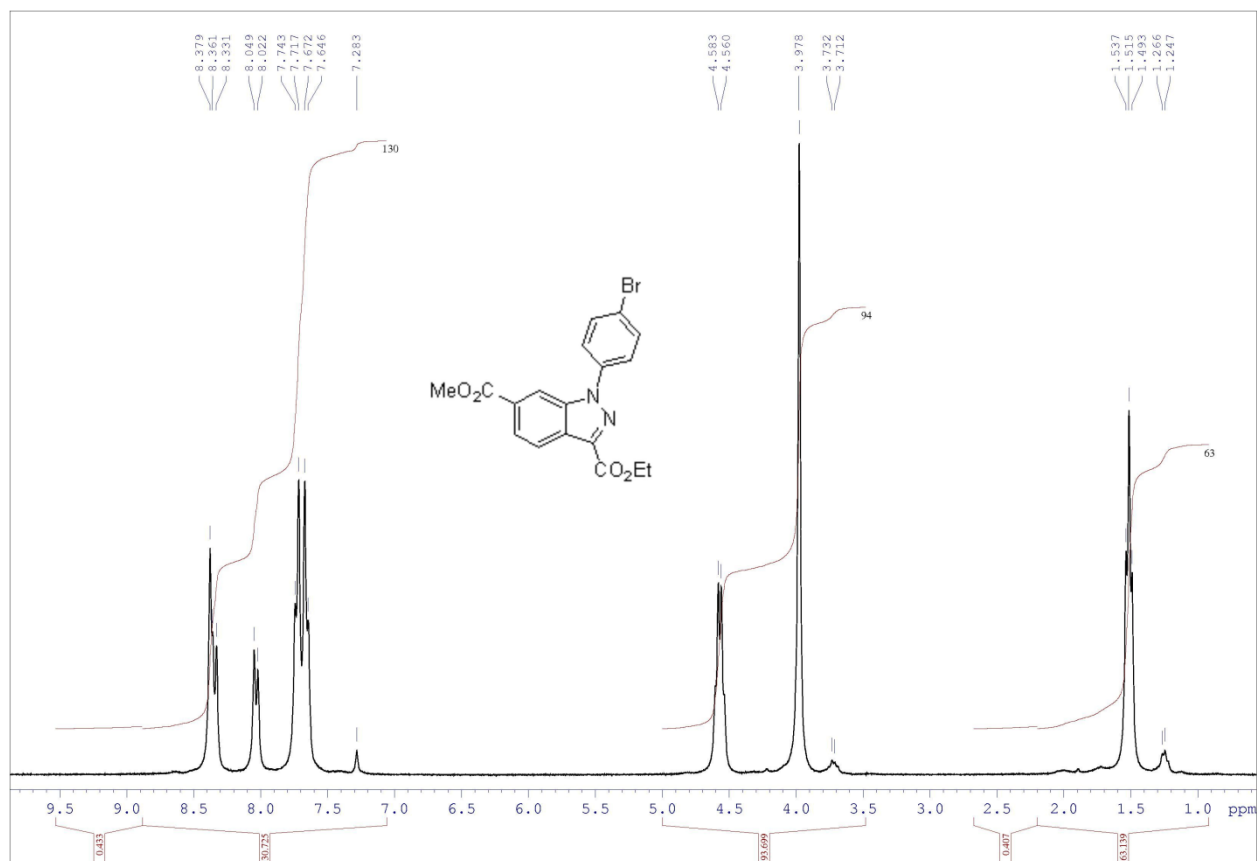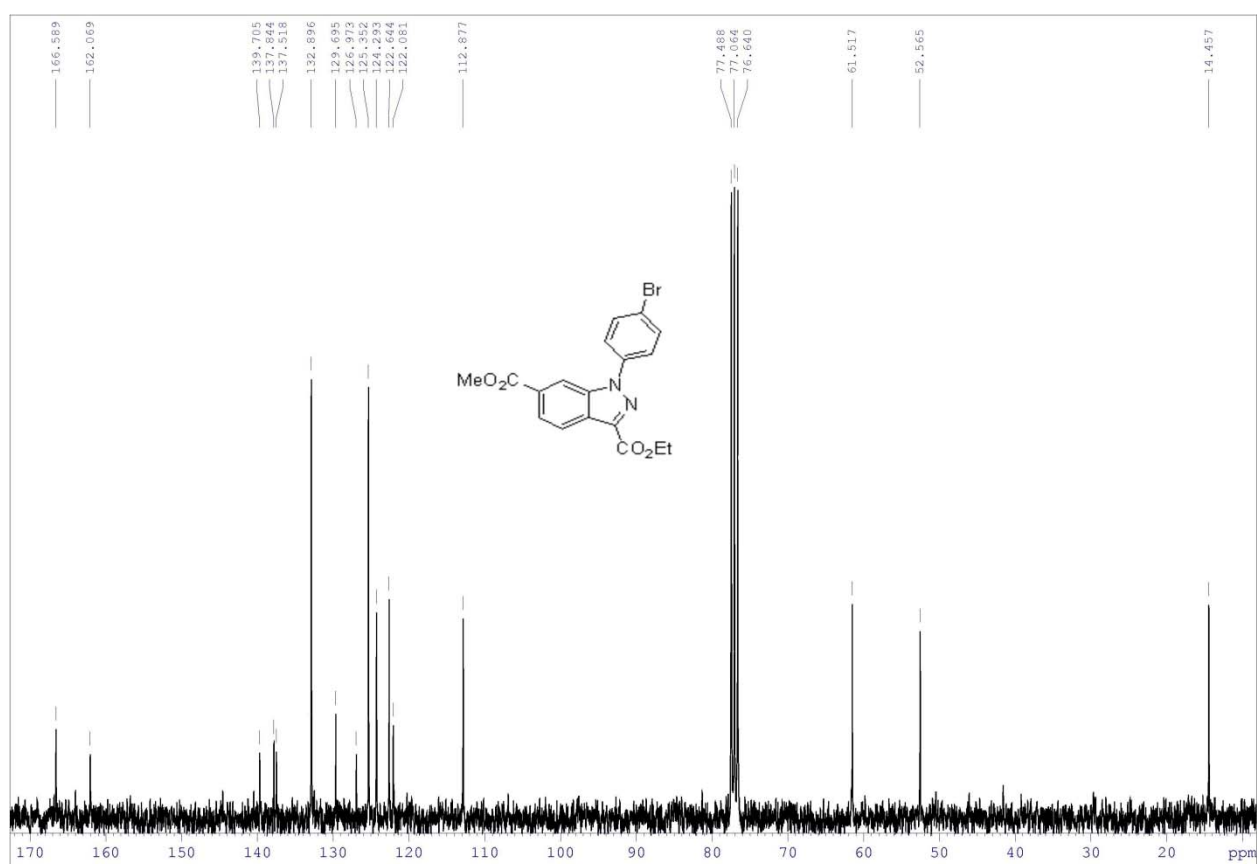

# HRMS spectrum of compound 8i

## Display Report

| Analysis Info |                                                | Acquisition Date  | 21.12.2022 15:26:09 |
|---------------|------------------------------------------------|-------------------|---------------------|
| Analysis Name | D:\Data\Kolotyrykina\2022\Bastrakov\1221036.d  | Operator          | BDAL@DE             |
| Method        | tune_low.m                                     | Instrument / Ser# | micrOTOF 10248      |
| Sample Name   | /LPIK YM-27                                    |                   |                     |
| Comment       | C18H15BrN2O4 mH 403.0287 calibrant added CH3CN |                   |                     |

| Acquisition Parameter |            | Ion Polarity         | Positive | Set Nebulizer    | 0.4 Bar   |
|-----------------------|------------|----------------------|----------|------------------|-----------|
| Source Type           | ESI        | Set Capillary        | 4500 V   | Set Dry Heater   | 180 °C    |
| Focus                 | Not active | Set End Plate Offset | -500 V   | Set Dry Gas      | 4.0 l/min |
| Scan Begin            | 50 m/z     |                      |          | Set Divert Valve | Waste     |
| Scan End              | 2500 m/z   |                      |          |                  |           |

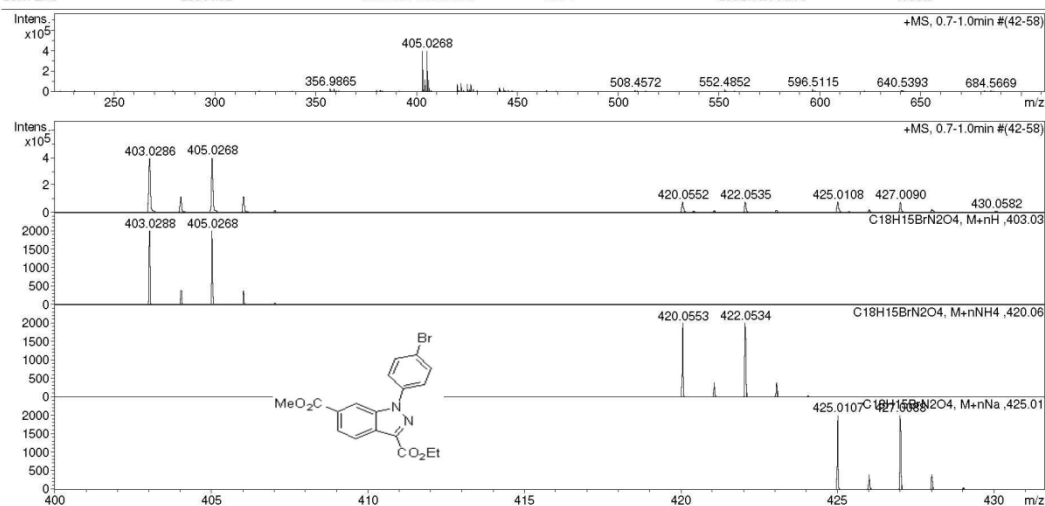

$^1\text{H}$  and  $^{13}\text{C}$  NMR spectra of compound **8j** in  $\text{CDCl}_3$

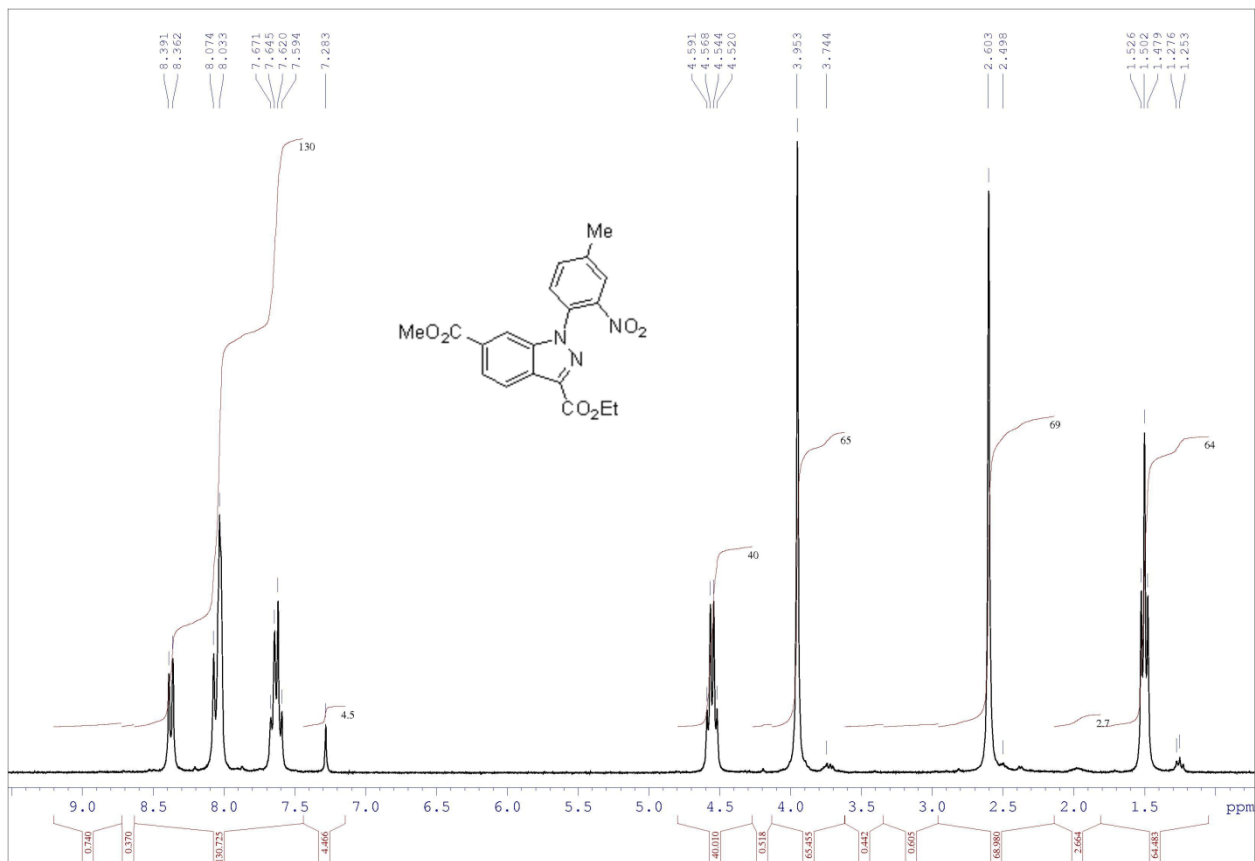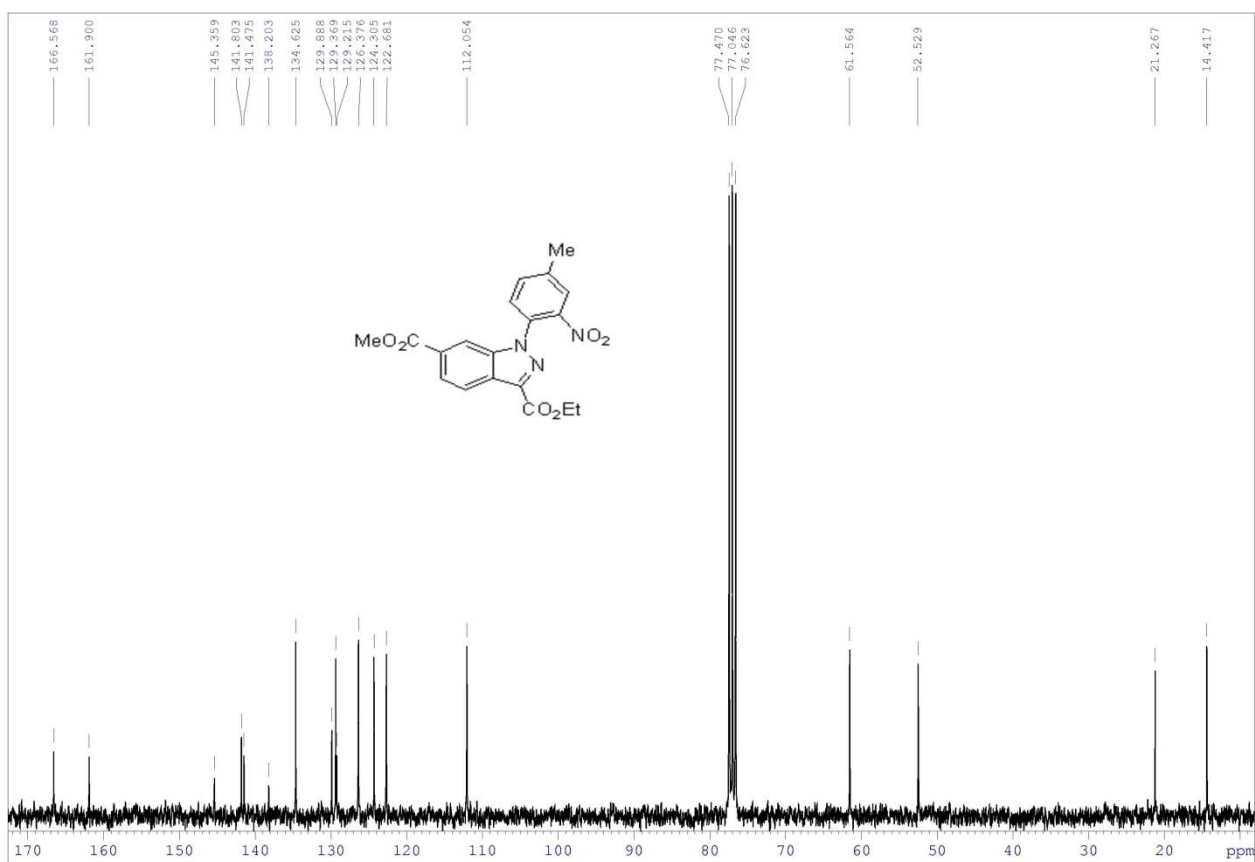



# HRMS spectrum of compound 8j

## Display Report

### Analysis Info

Analysis Name D:\Data\Kolotyrkina\2022\Bastrakov\1221037.d  
Method tune\_low.m  
Sample Name /LPIK YM-28  
Comment C19H17N3O6 mH 384.1190 calibrant added CH3CN

Acquisition Date 21.12.2022 15:31:56

Operator BDAL@DE  
Instrument / Ser# micrOTOF 10248

### Acquisition Parameter

|             |            |                      |          |                  |           |
|-------------|------------|----------------------|----------|------------------|-----------|
| Source Type | ESI        | Ion Polarity         | Positive | Set Nebulizer    | 0.4 Bar   |
| Focus       | Not active |                      |          | Set Dry Heater   | 180 °C    |
| Scan Begin  | 50 m/z     | Set Capillary        | 4500 V   | Set Dry Gas      | 4.0 l/min |
| Scan End    | 2500 m/z   | Set End Plate Offset | -500 V   | Set Divert Valve | Waste     |

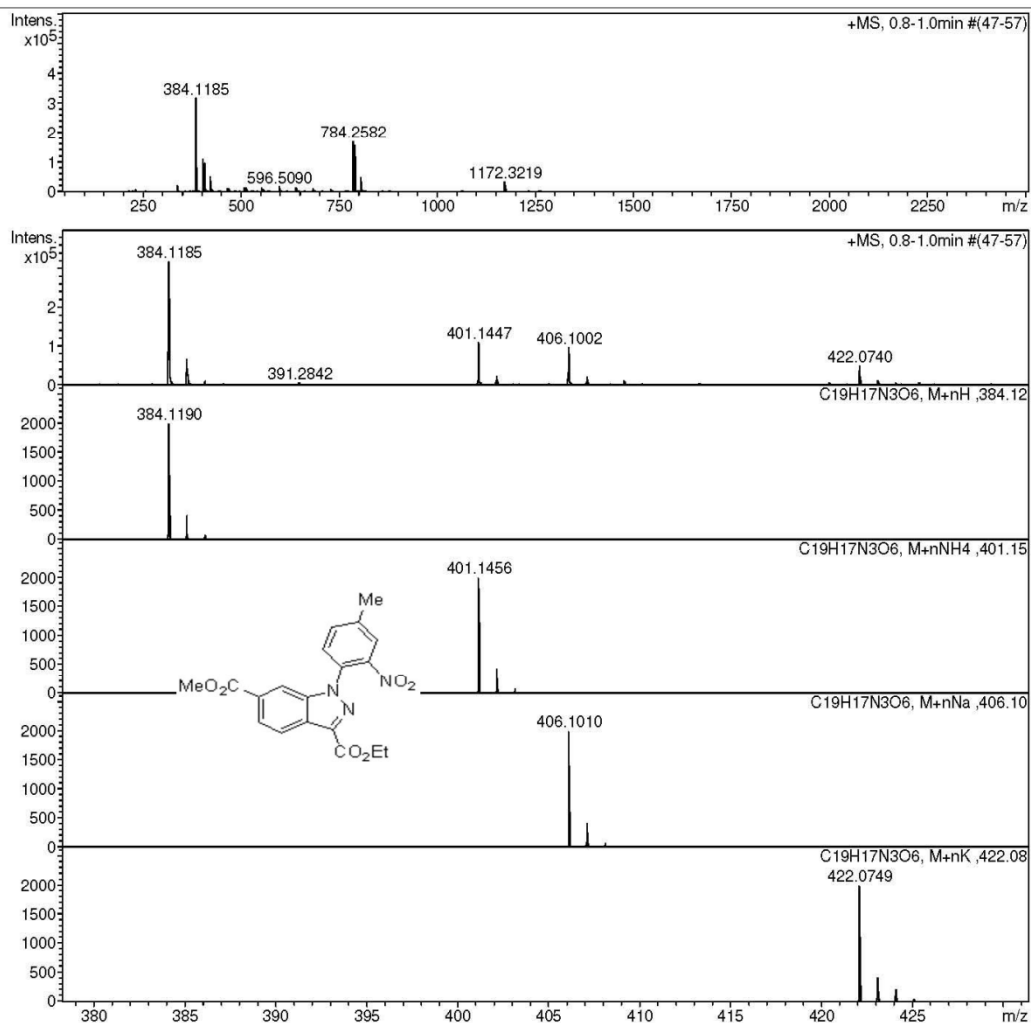

$^1\text{H}$  and  $^{13}\text{C}$  NMR spectra of compound **8k** in  $\text{CDCl}_3$

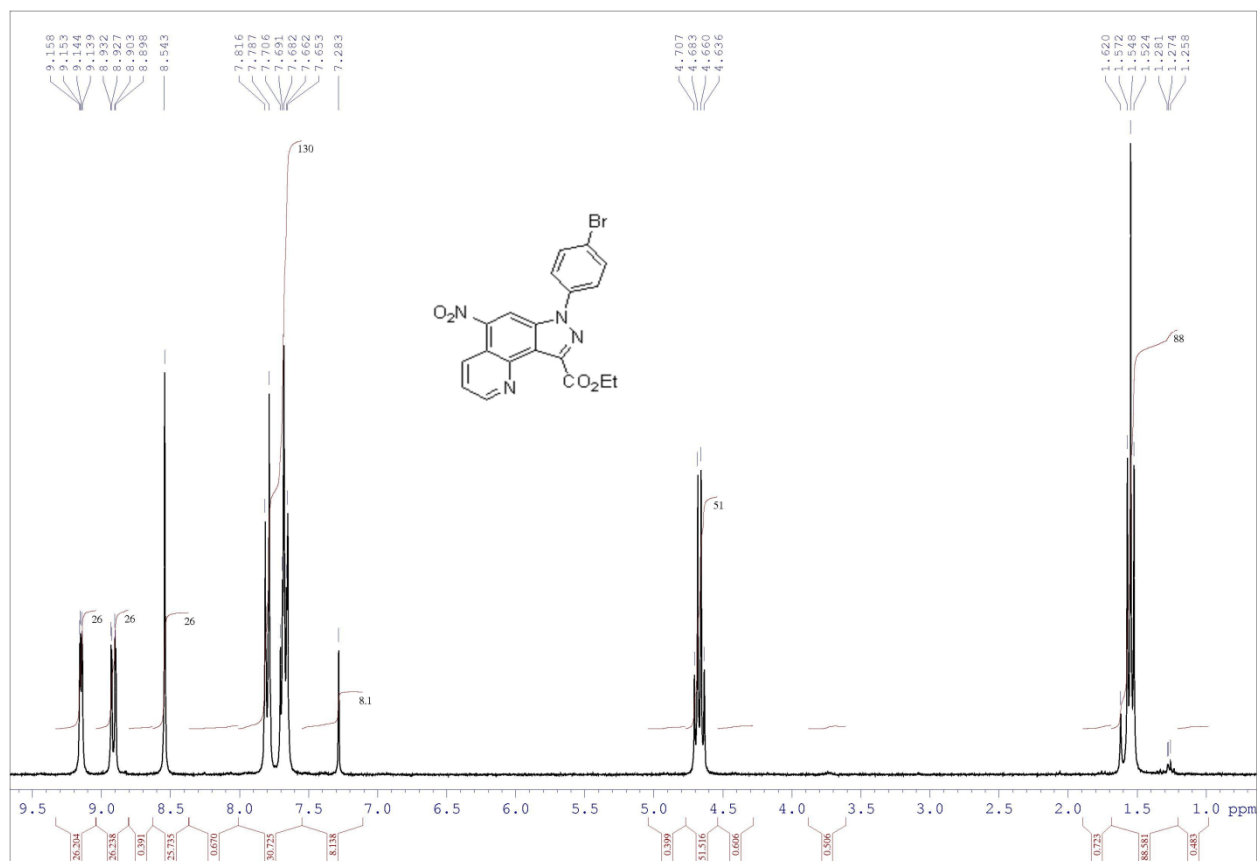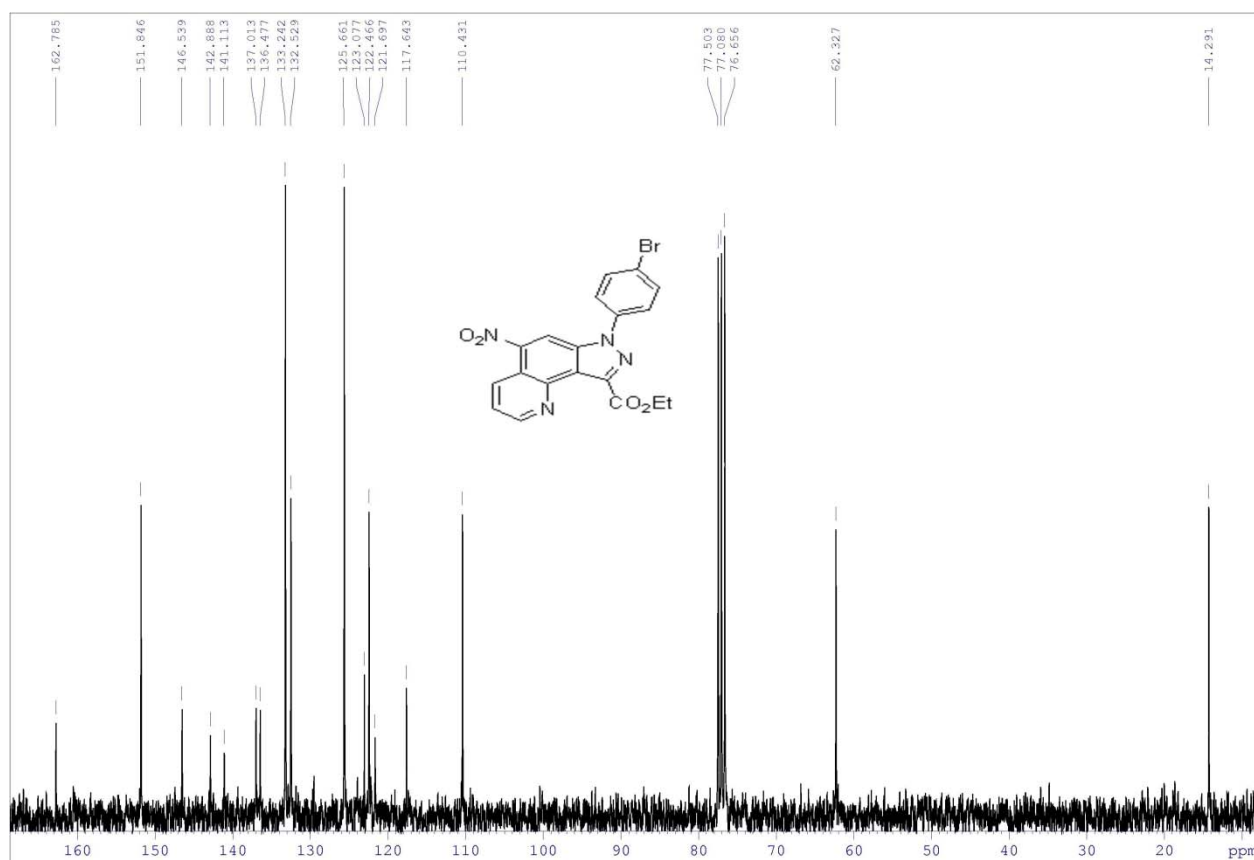

# HRMS spectrum of compound 8k

## Display Report

### Analysis Info

Analysis Name D:\Data\Kolotyrkina\2022\Bastrakov\1221038.d  
Method tune\_low.m  
Sample Name /LPIK YM-32  
Comment C<sub>19</sub>H<sub>13</sub>BrN<sub>4</sub>O<sub>4</sub> mH 441.0192 calibrant added CH<sub>3</sub>CN

Acquisition Date 21.12.2022 15:36:55

Operator BDAL@DE  
Instrument / Ser# micrOTOF 10248

### Acquisition Parameter

|             |            |                      |          |                  |           |
|-------------|------------|----------------------|----------|------------------|-----------|
| Source Type | ESI        | Ion Polarity         | Positive | Set Nebulizer    | 0.4 Bar   |
| Focus       | Not active |                      |          | Set Dry Heater   | 180 °C    |
| Scan Begin  | 50 m/z     | Set Capillary        | 4500 V   | Set Dry Gas      | 4.0 l/min |
| Scan End    | 2500 m/z   | Set End Plate Offset | -500 V   | Set Divert Valve | Waste     |

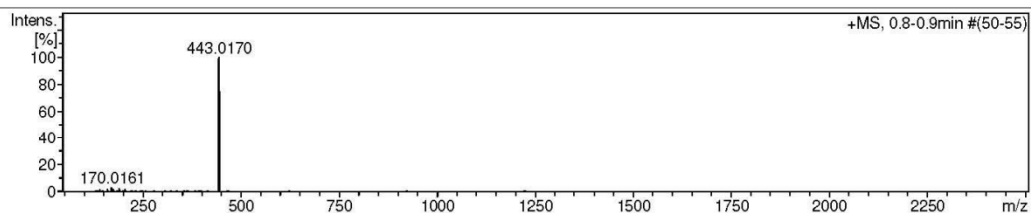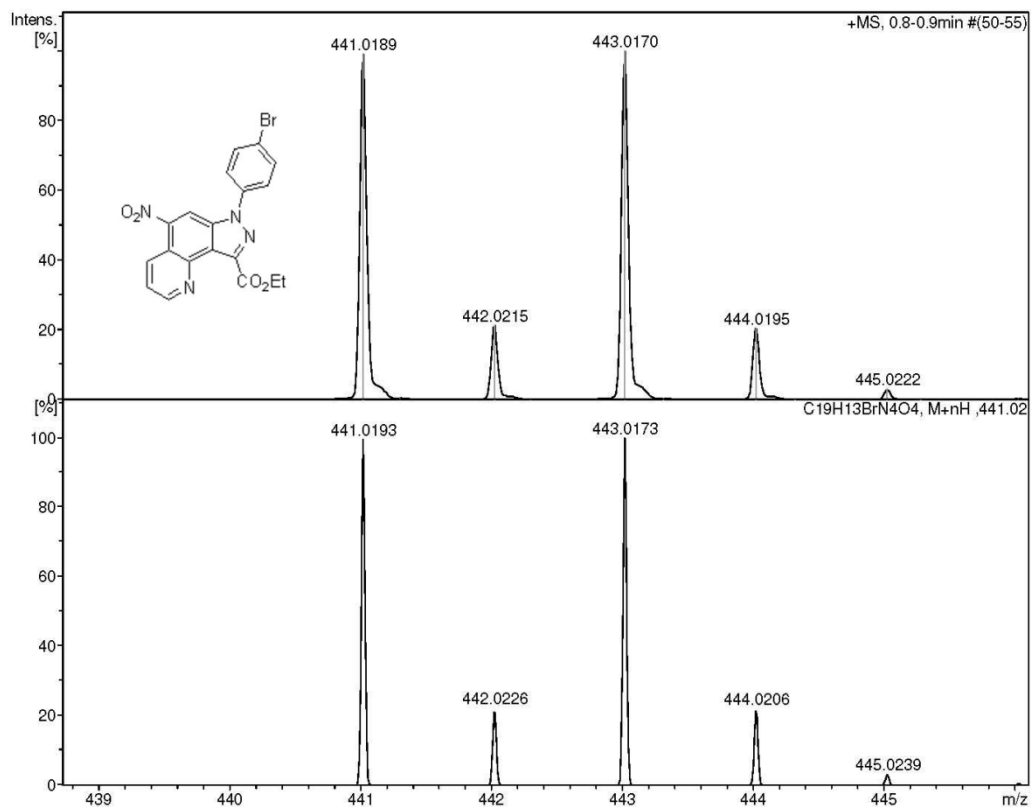

$^1\text{H}$  and  $^{13}\text{C}$  NMR spectra of compound **10e** in  $\text{CDCl}_3$

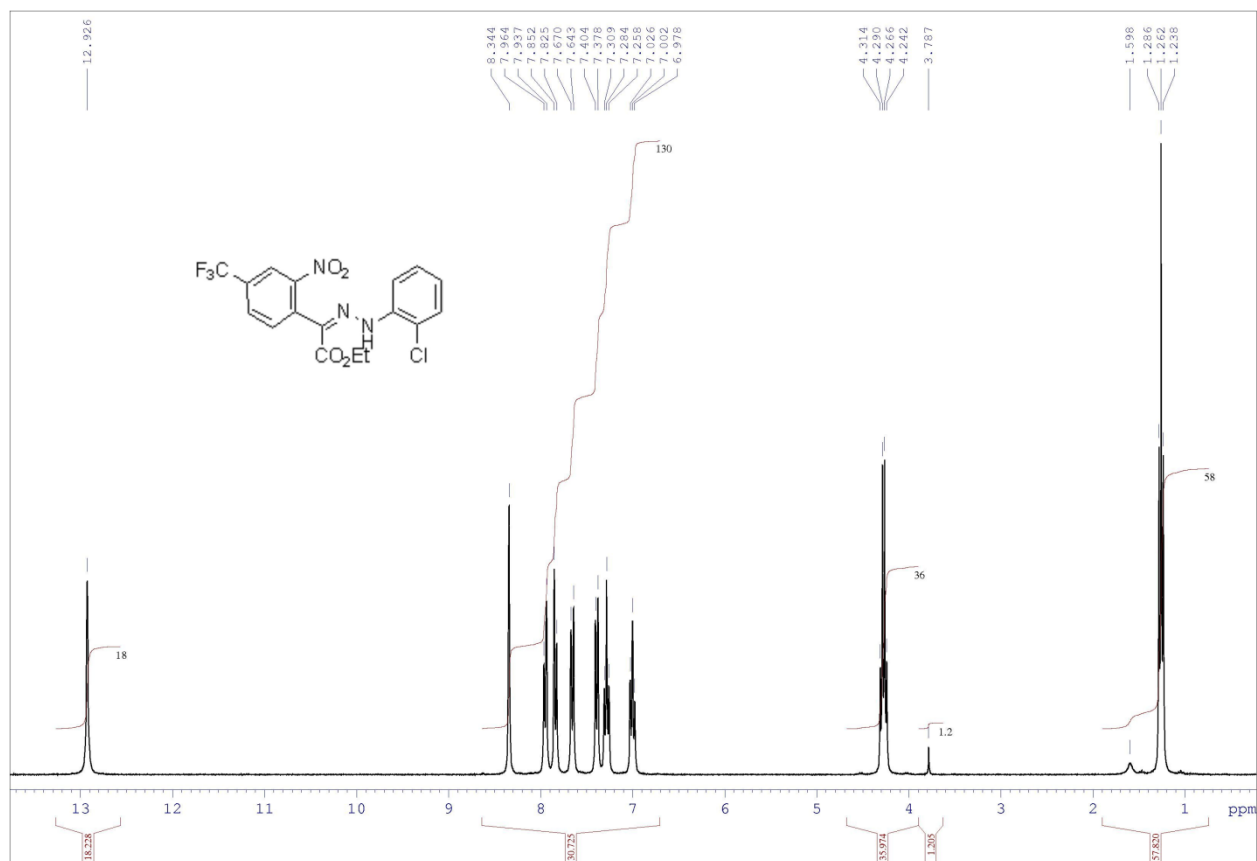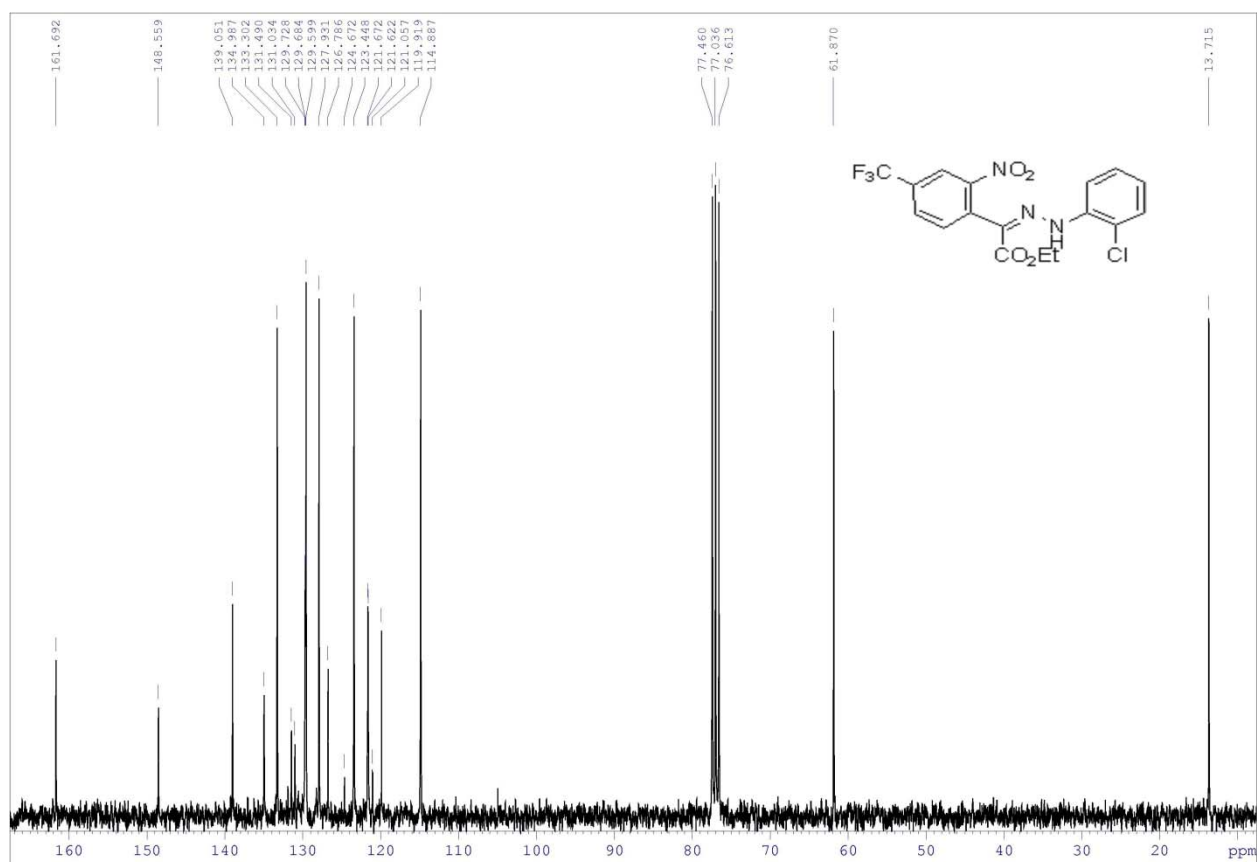

# HRMS spectrum of compound 10e

## Display Report

### Analysis Info

Analysis Name D:\Data\Kolotyrkina\2022\Niko'sky\1222009.d  
Method tune\_low.m  
Sample Name /LPIK VN-655  
Comment C17H13ClF3N3O4 mH 416.0619 calibrant added CH3OH

Acquisition Date 22.12.2022 13:42:25

Operator BDAL@DE  
Instrument / Ser# micrOTOF 10248

### Acquisition Parameter

|             |            |                      |          |                  |           |
|-------------|------------|----------------------|----------|------------------|-----------|
| Source Type | ESI        | Ion Polarity         | Positive | Set Nebulizer    | 0.4 Bar   |
| Focus       | Not active |                      |          | Set Dry Heater   | 180 °C    |
| Scan Begin  | 50 m/z     | Set Capillary        | 4500 V   | Set Dry Gas      | 4.0 l/min |
| Scan End    | 2500 m/z   | Set End Plate Offset | -500 V   | Set Divert Valve | Waste     |

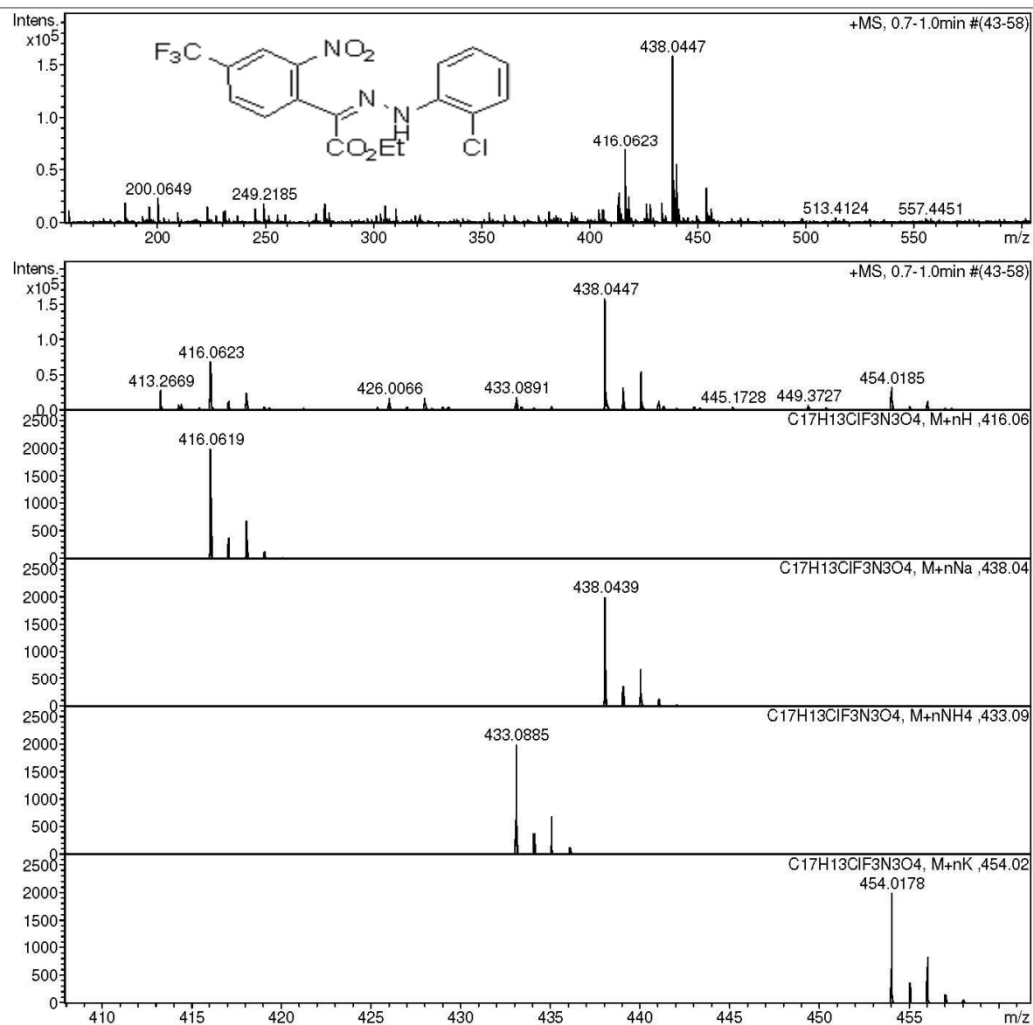

Supplement: s1 [file s1]
